# Supplementary material for: Enantioselective vinylogous aldol reaction between β,γ-unsaturated amides and isatins
Source: Royal Society of Chemistry journal article supplement (doi:10.1039/d4nj01147c), 2024-01-01
Supplement: d4nj01147c1.pdf [file d4nj01147c1.pdf]

## Supporting information

### Enantioselective vinylogous aldol reaction between $\beta,\gamma$ -unsaturated amides and isatins

Jun-Yi Hu<sup>#</sup>, Jun-Hao Fu<sup>#</sup>, Tian-Ze Li, Feng Sha, Xin-Yan Wu\*

<sup>#</sup> These two authors contributed equally to this work.

*Key Laboratory for Advanced Materials and Institute of Fine Chemicals, School of Chemistry & Molecular Engineering, East China University of Science and Technology, Shanghai 200237, P. R. China*

E-mail: [xinyanwu@ecust.edu.cn](mailto:xinyanwu@ecust.edu.cn), [shaf@ecust.edu.cn](mailto:shaf@ecust.edu.cn)

#### Table of Contents

|                                                                              |    |
|------------------------------------------------------------------------------|----|
| 1. General Information .....                                                 | 2  |
| 2. General Procedure for the Enantioselective Vinylogous Aldol Reaction..... | 2  |
| 3. Esterification of Product <b>3aa</b> .....                                | 15 |
| 4. Transformation of Product <b>3aa</b> to Spirolactone <b>6</b> .....       | 16 |
| 5. Transformation of Product <b>3ac</b> to Spirolactone <b>7</b> .....       | 17 |
| 6. References .....                                                          | 18 |
| 7. Copies of NMR Spectra of the Products <b>3-7</b> .....                    | 19 |
| 8. Copies of HPLC Spectra for the Product <b>3-7</b> .....                   | 52 |

## 1. General Information

Melting points were taken on WRS-1B digital melting-point apparatus without correction.  $^1\text{H}$  NMR and  $^{13}\text{C}$  NMR spectra were recorded on Bruker 400 spectrometer with  $\text{CDCl}_3$  or  $\text{DMSO-d}_6$  as solvent. The chemical shifts were referenced to tetramethylsilane (0.00 ppm) for  $^1\text{H}$  NMR spectra, and the residual solvent peak for  $^{13}\text{C}$  NMR (77.00 ppm for  $\text{CDCl}_3$  or 39.60 ppm for  $\text{d}_6\text{-DMSO}$ ). The following abbreviations were used to explain the multiplicities: s = singlet, d = doublet, t = triplet, q = quartet, m = multiplet, br = broad. IR spectra were recorded on Nicolet Magna-I 550 spectrometer. High resolution mass spectra (HRMS) were recorded on Micromass GCT and KE 465 LCT Premier/XE with Electron Spray Ionization (ESI-TOF) resource or Electron Impact (EI) resource. Optical rotations were measured on a WZZ-2A digital polarimeter at wavelength of the sodium D-line (589 nm). HPLC analysis was performed on Waters 510 equipment using Daicel Chiralcel OD-H column or Daicel Chiralpak AS-H column. Toluene, THF, and ether were freshly distilled from sodium-benzophenone. Ethyl acetate and  $\text{CH}_2\text{Cl}_2$  were freshly distilled from  $\text{CaH}_2$ .  $\text{CH}_3\text{CN}$  was freshly distilled from  $\text{P}_2\text{O}_5$ . MeOH was freshly distilled from Magnesium-iodine under  $\text{N}_2$  atmosphere. Thin-layer chromatography (TLC) was performed on 10-40  $\mu\text{m}$  silica gel plate. Column chromatography was performed using silica gel (300-400 mesh) eluted with ethyl acetate and  $\text{CH}_2\text{Cl}_2$ .

Chiral catalysts **C1-C9**<sup>1</sup>, allyl amides **1**<sup>2</sup> and ketimines **2**<sup>3</sup> were prepared according to literature procedures.

## 2. General Procedure for the Enantioselective Vinylogous Aldol Reaction

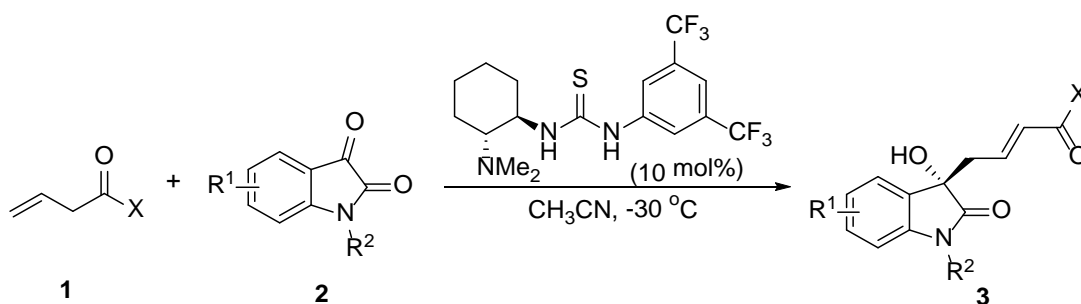

To a solution of  $\beta,\gamma$ -unsaturated amide **1** (0.3 mmol, 1.5 equiv.) and Takemoto catalyst (0.02 mmol, 10 mol%) in 2 mL  $\text{CH}_3\text{CN}$  was added isatin **2** (0.2 mmol, 1.0 equiv.) at  $-30\text{ }^\circ\text{C}$ , and the resulting mixture was stirred at this temperature until the reaction was completed (monitored by TLC). The solvent was removed under reduced pressure, and

the residue was purified by column chromatography (dichloromethane/ethyl acetate) to afford the desired product **3**.

**(*S,E*)-3-hydroxy-1-methyl-3-(4-oxo-4-(1*H*-pyrazol-1-yl)but-2-en-1-yl)indolin-2-one**  
**(3aa)**

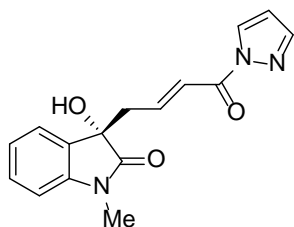

White solid, 51.8 mg, 87% yield, 99% ee; mp: 169.3-170.1 °C;  $[\alpha]_D^{20} = -15.8$  (*c* 0.33, CH<sub>2</sub>Cl<sub>2</sub>); <sup>1</sup>H NMR (400 MHz, CDCl<sub>3</sub>): δ 8.27 (d, *J* = 2.8 Hz, 1H), 7.69 (d, *J* = 0.8 Hz, 1H), 7.40 (dd, *J*<sub>1</sub> = 7.2 Hz, *J*<sub>2</sub> = 0.8 Hz, 1H), 7.35-7.29 (m, 2H), 7.28-7.20 (m, 1H), 7.10 (dt, *J*<sub>1</sub> = 7.6 Hz, *J*<sub>2</sub> = 0.8 Hz, 1H), 6.84 (d, *J* = 8.0 Hz, 1H), 6.44 (dd, *J*<sub>1</sub> = 2.8 Hz, *J*<sub>2</sub> = 1.6 Hz, 1H), 4.11 (brs, 1H), 3.19 (s, 3H), 3.09-3.04 (m, 1H), 2.84 (dd, *J*<sub>1</sub> = 14.0 Hz, *J*<sub>2</sub> = 7.6 Hz, 1H); <sup>13</sup>C{<sup>1</sup>H} NMR (100 MHz, CDCl<sub>3</sub>): δ 177.4, 162.5, 144.9, 143.9, 142.9, 130.0, 129.2, 128.6, 124.3, 123.6, 123.4, 109.8, 108.7, 75.6, 41.5, 26.3; IR (KBr, cm<sup>-1</sup>): ν 3005, 2360, 1712, 1614, 1385, 1353, 1275, 1261, 764, 750; HRMS (ESI) calcd for C<sub>16</sub>H<sub>15</sub>N<sub>3</sub>NaO<sub>3</sub><sup>+</sup> ([M+Na]<sup>+</sup>): 320.1006, found: 320.1001; HPLC analysis (Daicel Chiralcel OD-H column, λ = 254 nm, eluent: 90:10 hexane/2-propanol, flow rate: 0.9 mL/min): *t*<sub>R</sub> = 52.79 min (major), 74.00 min (minor).

**(*S,E*)-1-benzyl-3-hydroxy-3-(4-oxo-4-(1*H*-pyrazol-1-yl)but-2-en-1-yl)indolin-2-one**  
**(3ab)**

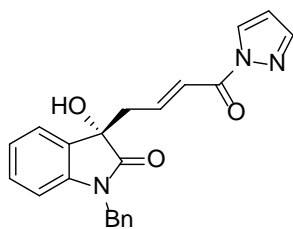

White solid, 66.6 mg, 89% yield, 92% ee; mp 172.1-174.2 °C;  $[\alpha]_D^{20} +11.7$  (*c* 0.60, CH<sub>2</sub>Cl<sub>2</sub>); <sup>1</sup>H NMR (400 MHz, CDCl<sub>3</sub>): δ 8.27 (d, *J* = 2.8 Hz, 1H), 7.67 (d, *J* = 0.8 Hz, 1H), 7.41 (dd, *J*<sub>1</sub> = 7.6 Hz, *J*<sub>2</sub> = 0.8 Hz, 1H), 7.34 (d, *J* = 15.6 Hz, 1H), 7.23-7.14 (m, 7H), 7.05 (dt, *J*<sub>1</sub> = 7.6 Hz, *J*<sub>2</sub> = 0.4 Hz, 1H), 6.70 (d, *J* = 8.0 Hz, 1H), 6.43 (dd, *J*<sub>1</sub> = 2.8 Hz, *J*<sub>2</sub> = 1.6 Hz, 1H), 5.02 (d, *J* = 15.6 Hz, 1H), 4.69 (d, *J* = 15.6 Hz, 1H), 4.00 (brs, 1H), 3.13 (ddd, *J*<sub>1</sub> = 14.0 Hz, *J*<sub>2</sub> = 6.8 Hz, *J*<sub>3</sub> = 1.6 Hz, 1H), 2.96 (dd, *J*<sub>1</sub> = 14.0 Hz, *J*<sub>2</sub> = 8.4 Hz, 1H); <sup>13</sup>C{<sup>1</sup>H} NMR (100 MHz, CDCl<sub>3</sub>): δ 177.3, 162.4, 144.6, 143.9, 142.1, 135.1, 129.9, 129.0, 128.8, 128.6, 127.6, 127.1, 124.3, 123.8, 123.4, 109.9, 109.8, 75.7, 43.9, 41.7; IR (KBr, cm<sup>-1</sup>): ν 3377, 1717, 1639, 1615, 1463, 1401, 1343, 1276, 971, 945; HRMS (ESI) calcd for C<sub>22</sub>H<sub>19</sub>N<sub>3</sub>NaO<sub>3</sub><sup>+</sup> ([M+Na]<sup>+</sup>): 396.1319, found: 396.1316; HPLC analysis (Daicel Chiralcel OD-H column, λ = 254 nm, eluent: 90:10 hexane/2-propanol, flow rate: 0.9 mL/min): *t*<sub>R</sub> = 23.21 min (major), 37.11 min (minor).

**(*S,E*)-3-hydroxy-3-(4-oxo-4-(1*H*-pyrazol-1-yl)but-2-en-1-yl)indolin-2-one (3ac)**

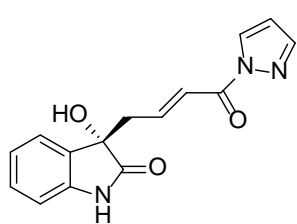

White solid, 48.2 mg, 85% yield, 95% ee; mp 150.7-151.0 °C;  $[\alpha]_{\text{D}}^{20} +13.2$  (*c* 0.49, CH<sub>2</sub>Cl<sub>2</sub>); <sup>1</sup>H NMR (400 MHz, DMSO-*d*<sub>6</sub>):  $\delta$  10.37 (s, 1H), 8.43 (d, *J* = 2.8 Hz, 1H), 7.89 (d, *J* = 0.8 Hz, 1H), 7.28 (d, *J* = 7.2 Hz, 1H), 7.23-7.21 (m, 1H), 7.20-7.19 (m, 1H), 7.15-7.08 (m, 1H), 6.99-6.95 (m, 1H), 6.82 (d, *J* = 7.6 Hz, 1H), 6.62 (dd, *J*<sub>1</sub> = 2.8 Hz, *J*<sub>2</sub> = 1.6 Hz, 1H), 6.29 (s, 1H), 2.92-2.87 (m, 1H), 2.80 (dd, *J*<sub>1</sub> = 14.0 Hz, *J*<sub>2</sub> = 7.6 Hz, 1H); <sup>13</sup>C{<sup>1</sup>H} NMR (100 MHz, DMSO-*d*<sub>6</sub>):  $\delta$  178.4, 162.2, 146.7, 144.6, 141.5, 131.3, 129.4 129.2, 124.3 122.2, 121.9, 110.7, 109.9, 75.0, 40.8; IR (KBr, cm<sup>-1</sup>):  $\nu$  3006, 1715, 1614, 1470, 1382, 1275, 1261, 1196, 1077, 764; HRMS (ESI) calcd for C<sub>15</sub>H<sub>14</sub>N<sub>3</sub>O<sub>3</sub><sup>+</sup> ([M+H]<sup>+</sup>): 284.1030, found: 284.1027; HPLC analysis (Daicel Chiralcel OD-H column,  $\lambda$  = 254 nm, eluent: 90:10 hexane/2-propanol, flow rate: 0.9 mL/min): *t*<sub>R</sub> = 17.03 min (major), 26.27 min (minor).

**(*S,E*)-3-hydroxy-1,4-dimethyl-3-(4-oxo-4-(1*H*-pyrazol-1-yl)but-2-en-1-yl)indolin-2-one (3ad)**

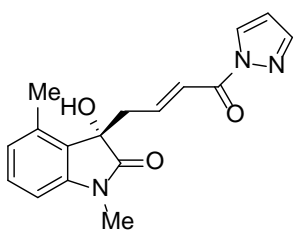

White solid, 54.9 mg, 88% yield, 99% ee; mp 184.3-184.5 °C;  $[\alpha]_{\text{D}}^{20} +30.9$  (*c* 0.44, CH<sub>2</sub>Cl<sub>2</sub>); <sup>1</sup>H NMR (400 MHz, CDCl<sub>3</sub>):  $\delta$  8.22 (d, *J* = 2.8 Hz, 1H), 7.69 (d, *J* = 0.8 Hz, 1H), 7.29-7.25 (m, 1H), 7.20 (t, *J* = 8.0 Hz, 1H), 6.91-6.83 (m, 2H), 6.65 (d, *J* = 7.6 Hz, 1H), 6.42 (dd, *J*<sub>1</sub> = 2.8 Hz, *J*<sub>2</sub> = 1.6 Hz, 1H), 3.80 (s, 1H), 3.17-3.14 (m, 5H), 2.50 (s, 3H); <sup>13</sup>C{<sup>1</sup>H} NMR (100 MHz, CDCl<sub>3</sub>):  $\delta$  177.2, 162.4, 144.5, 143.9, 143.1, 136.0, 129.7, 128.6, 126.1, 125.8, 122.9, 109.8, 106.2, 76.9, 40.5, 26.3, 17.6; IR (KBr, cm<sup>-1</sup>):  $\nu$  3390, 2924, 1712, 1643, 1607, 1385, 1275, 1200, 1077, 765; HRMS (ESI) calcd for C<sub>17</sub>H<sub>17</sub>N<sub>3</sub>NaO<sub>3</sub><sup>+</sup> ([M+Na]<sup>+</sup>): 334.1162, found: 334.1166; HPLC analysis (Daicel Chiralpak AS-H column,  $\lambda$  = 254 nm, eluent: 90:10 hexane/EtOH, flow rate: 0.7 mL/min): *t*<sub>R</sub> = 25.17 min (major), 40.43 min (minor).

**(*S,E*)-4-chloro-3-hydroxy-1-methyl-3-(4-oxo-4-(1*H*-pyrazol-1-yl)but-2-en-1-yl)indolin-2-one (3ae)**

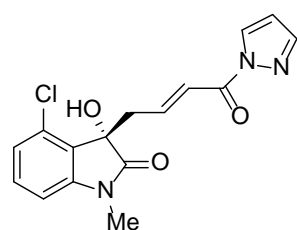

White solid, 59.9 mg, 90% yield, 91% ee; mp 164.2-164.9 °C;  $[\alpha]_{\text{D}}^{20} +11.7$  (*c* 0.46, CH<sub>2</sub>Cl<sub>2</sub>); <sup>1</sup>H NMR (400 MHz, CDCl<sub>3</sub>):  $\delta$  8.21 (d, *J* = 2.8 Hz, 1H), 7.69 (d, *J* = 0.8 Hz, 1H), 7.31-7.23 (m, 2H), 7.04 (dd, *J*<sub>1</sub> = 8.0 Hz, *J*<sub>2</sub> = 0.4 Hz, 1H), 6.88-6.80 (m, 1H), 6.73 (d, *J* = 7.6 Hz, 1H), 6.42 (dd, *J*<sub>1</sub> = 2.8 Hz, *J*<sub>2</sub> = 1.2 Hz, 1H), 3.97 (s, 1H), 3.42 (ddd, *J*<sub>1</sub> = 13.6 Hz, *J*<sub>2</sub> = 7.6 Hz, *J*<sub>3</sub> = 1.2 Hz, 1H), 3.22 (ddd, *J*<sub>1</sub> = 13.6 Hz, *J*<sub>2</sub> = 7.6 Hz, *J*<sub>3</sub> = 1.2 Hz, 1H), 3.17 (s, 3H); <sup>13</sup>C{<sup>1</sup>H} NMR (100 MHz, CDCl<sub>3</sub>):  $\delta$  176.0, 162.4, 144.9, 143.9 143.8, 131.5, 131.2, 128.5, 125.2, 124.4, 123.3, 109.9, 107.2,

76.7, 39.1, 26.5; IR (KBr,  $\text{cm}^{-1}$ ):  $\nu$  3006, 1713, 1643, 1609, 1385, 1276, 1200, 1131, 764, 750; HRMS (ESI) calcd for  $\text{C}_{16}\text{H}_{14}^{35}\text{ClN}_3\text{NaO}_3^+$  ( $[\text{M}+\text{Na}]^+$ ): 354.0616, found: 354.0608; HPLC analysis (Daicel Chiralpak AS-H column,  $\lambda = 254$  nm, eluent: 90:10 hexane/EtOH, flow rate: 0.7 mL/min):  $t_{\text{R}} = 24.99$  min (major), 39.72 min (minor).

**(*S,E*)-3-hydroxy-1,5-dimethyl-3-(4-oxo-4-(1*H*-pyrazol-1-yl)but-2-en-1-yl)indolin-2-one (3af)**

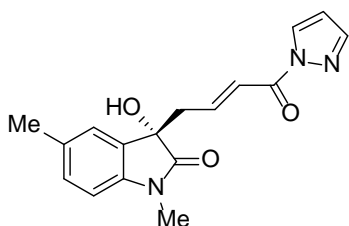

White solid, 55.0 mg, 88% yield, 97% ee; mp 153.6-154.2 °C;  $[\alpha]_{\text{D}}^{20} +45.7$  ( $c$  0.46,  $\text{CH}_2\text{Cl}_2$ );  $^1\text{H}$  NMR (400 MHz,  $\text{CDCl}_3$ ):  $\delta$  8.28 (d,  $J = 2.8$  Hz, 1H), 7.70 (d,  $J = 0.8$  Hz, 1H), 7.32 (d,  $J = 15.6$  Hz, 1H), 7.25-7.17 (m, 2H), 7.12 (dd,  $J_1 = 8.0$  Hz,  $J_2 = 0.8$  Hz, 1H), 6.73 (d,  $J = 8.0$  Hz, 1H), 6.44 (dd,  $J_1 = 2.8$  Hz,  $J_2 = 1.2$  Hz, 1H), 3.62 (brs, 1H), 3.20-3.15 (m, 3H), 3.05 (ddd,  $J_1 = 14.0$  Hz,  $J_2 = 6.4$  Hz,  $J_3 = 1.2$  Hz, 1H), 2.90-2.84 (m, 1H), 2.33 (s, 3H);  $^{13}\text{C}\{^1\text{H}\}$  NMR (100 MHz,  $\text{CDCl}_3$ ):  $\delta$  177.2, 162.5, 144.9, 143.9, 140.6, 133.0, 130.2, 129.1, 128.6, 125.0, 123.5, 109.8, 108.4, 75.7, 41.6, 26.3, 21.1; IR (KBr,  $\text{cm}^{-1}$ ):  $\nu$  3382, 3005, 1712, 1642, 1499, 1385, 1275, 1198, 1096, 764; HRMS (ESI) calcd for  $\text{C}_{17}\text{H}_{17}\text{N}_3\text{NaO}_3^+$  ( $[\text{M}+\text{Na}]^+$ ): 334.1162, found: 334.1160; HPLC analysis (Daicel Chiralpak AS-H column,  $\lambda = 254$  nm, eluent: 90:10 hexane/EtOH, flow rate: 0.7 mL/min):  $t_{\text{R}} = 34.88$  min (major), 61.11 min (minor).

**(*S,E*)-5-fluoro-3-hydroxy-1-methyl-3-(4-oxo-4-(1*H*-pyrazol-1-yl)but-2-en-1-yl)indolin-2-one (3ag)**

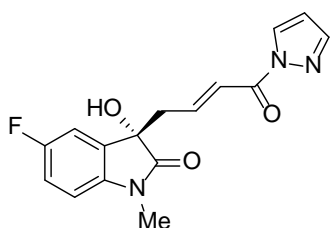

White solid, 61.3 mg, 97% yield, 88% ee; mp 168.5-168.9 °C;  $[\alpha]_{\text{D}}^{20} -10.6$  ( $c$  0.51,  $\text{CH}_2\text{Cl}_2$ );  $^1\text{H}$  NMR (400 MHz,  $\text{CDCl}_3$ ):  $\delta$  8.27 (d,  $J = 2.8$  Hz, 1H), 7.68 (d,  $J = 0.8$  Hz, 1H), 7.32-7.28 (m, 1H), 7.25-7.17 (m, 2H), 7.08-7.00 (m, 2H), 6.44 (dd,  $J_1 = 2.8$  Hz,  $J_2 = 1.6$  Hz, 1H), 4.54 (brs, 1H), 3.39 (dd,  $J_1 = 10.8$  Hz,  $J_2 = 2.4$  Hz, 3H), 3.08-3.03 (m, 1H), 2.86 (dd,  $J_1 = 14.0$  Hz,  $J_2 = 8.0$  Hz, 1H);  $^{13}\text{C}\{^1\text{H}\}$  NMR (100 MHz,  $\text{CDCl}_3$ ):  $\delta$  177.1, 162.4, 147.8 (d,  $J = 243.3$  Hz), 144.4, 144.0, 132.1 (d,  $J = 2.5$  Hz), 129.3 (d,  $J = 8.4$  Hz), 128.7, 124.1, 123.7, 120.1, 117.9 (d,  $J = 19.1$  Hz), 109.9, 75.6, 41.5, 28.8; IR (KBr,  $\text{cm}^{-1}$ ):  $\nu$  3390, 3005, 1713, 1643, 1417, 1385, 1354, 1275, 1261, 765; HRMS (ESI) calcd for  $\text{C}_{16}\text{H}_{14}\text{FN}_3\text{NaO}_3^+$  ( $[\text{M}+\text{Na}]^+$ ): 338.0911, found: 338.0921; HPLC analysis (Daicel Chiralpak AS-H column,  $\lambda = 254$  nm, eluent: 90:10 hexane/EtOH, flow rate: 0.7 mL/min):  $t_{\text{R}} = 24.75$  min (major), 51.62 min (minor).

**(*S,E*)-5-chloro-3-hydroxy-1-methyl-3-(4-oxo-4-(1*H*-pyrazol-1-yl)but-2-en-1-yl)indolin-2-one (3ah)**

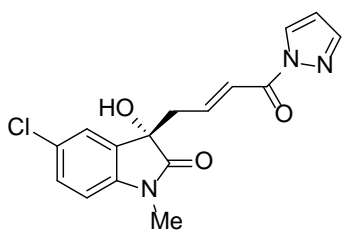

White solid, 62.0 mg, 93% yield, 85% ee; mp: 112.5-113.4 °C;  $[\alpha]_D^{20} = +67.4$  (*c* 0.57, CH<sub>2</sub>Cl<sub>2</sub>); <sup>1</sup>H NMR (400 MHz, CDCl<sub>3</sub>): δ 8.27 (d, *J* = 2.8 Hz, 1H), 7.69 (d, *J* = 0.4 Hz, 1H), 7.39 (d, *J* = 2.0 Hz, 1H), 7.34-7.29 (m, 2H), 7.19-7.12 (m, 1H), 6.77 (d, *J* = 8.0 Hz, 1H), 6.44 (dd, *J*<sub>1</sub> = 2.8 Hz, *J*<sub>2</sub> = 1.2 Hz, 1H), 4.57 (brs, 1H), 3.17 (s, 3H), 3.04 (ddd, *J*<sub>1</sub> = 14.4 Hz, *J*<sub>2</sub> = 7.2 Hz, *J*<sub>3</sub> = 1.2 Hz, 1H), 2.88 (dd, *J*<sub>1</sub> = 14.4 Hz, *J*<sub>2</sub> = 8.0 Hz, 1H); <sup>13</sup>C{<sup>1</sup>H} NMR (100 MHz, CDCl<sub>3</sub>): δ 177.0, 162.4, 144.0, 144.0, 141.4, 130.9, 129.9, 128.8, 128.7, 124.8, 123.9, 109.9, 109.7, 75.7, 41.3, 26.4; IR (KBr, cm<sup>-1</sup>): ν 3390, 1713, 1385, 1354, 1275, 1261, 765, 747; HRMS (ESI) calcd for C<sub>16</sub>H<sub>15</sub><sup>35</sup>ClN<sub>3</sub>O<sub>3</sub><sup>+</sup> ([M+H]<sup>+</sup>): 332.0797, found: 332.0794; HPLC analysis (Daicel Chiralpak AS-H column, λ = 254 nm, eluent: 90:10 hexane/EtOH, flow rate: 0.7 mL/min): *t*<sub>R</sub> = 22.99 min (major), 45.88 min (minor).

**(*S,E*)-5-bromo-3-hydroxy-1-methyl-3-(4-oxo-4-(1*H*-pyrazol-1-yl)but-2-en-1-yl)indolin-2-one (3ai)**

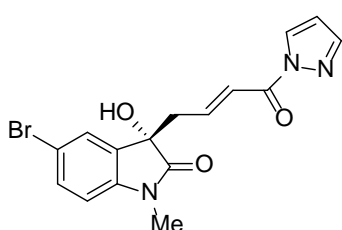

White solid, 62.6 mg, 83% yield, 85% ee; mp 151.2-152.2 °C;  $[\alpha]_D^{20} +32.8$  (*c* 0.52, CH<sub>2</sub>Cl<sub>2</sub>); <sup>1</sup>H NMR (400 MHz, CDCl<sub>3</sub>): δ 8.28 (d, *J* = 2.8 Hz, 1H), 7.71 (d, *J* = 0.8 Hz, 1H), 7.53 (d, *J* = 1.6 Hz, 1H), 7.46 (dd, *J*<sub>1</sub> = 8.4 Hz, *J*<sub>2</sub> = 2.0 Hz, 1H), 7.33 (d, *J* = 15.6 Hz, 1H), 7.19-7.12 (m, 1H), 6.73 (d, *J* = 8.4 Hz, 1H), 6.45 (dd, *J*<sub>1</sub> = 2.8 Hz, *J*<sub>2</sub> = 1.2 Hz, 1H), 3.86 (brs, 1H), 3.17 (s, 3H), 3.03 (ddd, *J*<sub>1</sub> = 14.0 Hz, *J*<sub>2</sub> = 6.8 Hz, *J*<sub>3</sub> = 1.2 Hz, 1H), 2.89 (ddd, *J*<sub>1</sub> = 14.0 Hz, *J*<sub>2</sub> = 8.0 Hz, *J*<sub>3</sub> = 0.8 Hz, 1H); <sup>13</sup>C{<sup>1</sup>H} NMR (100 MHz, CDCl<sub>3</sub>): δ 176.7, 162.4, 144.0, 143.9, 142.0, 132.9, 131.1, 128.7, 127.5, 124.1, 116.1, 110.2, 110.0, 75.6, 41.4, 26.4; IR (KBr, cm<sup>-1</sup>): ν 3390, 1713, 1643, 1609, 1385, 1354, 1201, 1098, 932, 810; HRMS (ESI) calcd for C<sub>16</sub>H<sub>15</sub><sup>79</sup>BrN<sub>3</sub>O<sub>3</sub><sup>+</sup> ([M+H]<sup>+</sup>): 376.0291, found: 376.0290; HPLC analysis (Daicel Chiralcel OD-H column, λ = 254 nm, eluent: 90:10 hexane/2-propanol, flow rate: 0.9 mL/min): *t*<sub>R</sub> = 36.12 min (major), 32.48 min (minor).

**(*S,E*)-3-hydroxy-1,6-dimethyl-3-(4-oxo-4-(1*H*-pyrazol-1-yl)but-2-en-1-yl)indolin-2-one (3aj)**

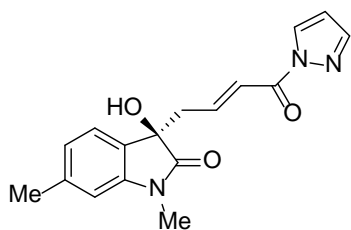

White solid, 51.3 mg, 82% yield, 98% ee; mp 190.1-190.5 °C;  $[\alpha]_{\text{D}}^{20}$  -10.2 (*c* 0.42, CH<sub>2</sub>Cl<sub>2</sub>); <sup>1</sup>H NMR (400 MHz, DMSO-d<sub>6</sub>): δ 8.43 (d, *J* = 2.8 Hz, 1H), 7.90 (d, *J* = 0.8 Hz, 1H), 7.21-7.09 (m, 3H), 6.86 (d, *J* = 8.8 Hz, 2H), 6.63 (dd, *J*<sub>1</sub> = 2.8 Hz, *J*<sub>2</sub> = 1.6 Hz, 1H), 6.27 (s, 1H), 3.37 (s, 1H), 3.08 (s, 3H), 2.89 (dd, *J*<sub>1</sub> = 14.4 Hz, *J*<sub>2</sub> = 5.6 Hz, 1H), 2.78 (dd, *J*<sub>1</sub> = 14.8 Hz, *J*<sub>2</sub> = 6.4 Hz, 1H), 2.32 (s, 3H); <sup>13</sup>C{<sup>1</sup>H} NMR (100 MHz, DMSO-d<sub>6</sub>): δ 176.8, 162.2, 147.0, 144.6, 143.1, 139.2, 129.2, 127.8, 123.7, 122.9, 122.1, 110.7, 109.5, 74.6, 40.8, 25.9, 21.5; IR (KBr, cm<sup>-1</sup>): ν 3390, 2926, 1712, 1642, 1605, 1385, 1354, 1198, 1077; HRMS (ESI) calcd for C<sub>17</sub>H<sub>17</sub>N<sub>3</sub>NaO<sub>3</sub><sup>+</sup> ([M+Na]<sup>+</sup>): 334.1162, found: 334.1156; HPLC analysis (Daicel Chiralpak AS-H column, λ = 254 nm, eluent: 90:10 hexane/EtOH, flow rate: 0.7 mL/min): *t*<sub>R</sub> = 25.35 min (major), 42.36 min (minor).

**(*S,E*)-3-hydroxy-6-methoxy-1-methyl-3-(4-oxo-4-(1*H*-pyrazol-1-yl)but-2-en-1-yl)indolin-2-one (3ak)**

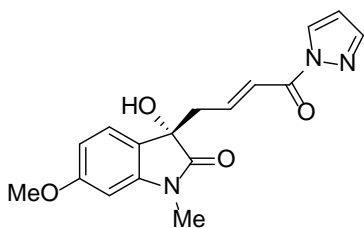

White solid, 57.3 mg, 88% yield, 97% ee; mp 165.7-167.4 °C;  $[\alpha]_{\text{D}}^{20}$  -15.6 (*c* 0.36, CH<sub>2</sub>Cl<sub>2</sub>); <sup>1</sup>H NMR (400 MHz, CDCl<sub>3</sub>): δ 8.28 (d, *J* = 2.8 Hz, 1H), 7.69 (d, *J* = 0.8 Hz, 1H), 7.33-7.20 (m, 3H), 6.56 (dd, *J*<sub>1</sub> = 8.0 Hz, *J*<sub>2</sub> = 2.4 Hz, 1H), 6.44 (dd, *J*<sub>1</sub> = 2.8 Hz, *J*<sub>2</sub> = 1.6 Hz, 1H), 6.40 (d, *J* = 2.0 Hz, 1H), 3.81 (s, 4H), 3.15 (s, 3H), 3.07-3.02 (m, 1H), 2.82 (dd, *J*<sub>1</sub> = 14.0 Hz, *J*<sub>2</sub> = 7.6 Hz, 1H); <sup>13</sup>C{<sup>1</sup>H} NMR (100 MHz, DMSO-d<sub>6</sub>): δ 177.1, 162.2, 160.8, 147.1, 144.6, 144.4, 129.1, 124.7, 122.5, 122.0, 110.7, 106.7, 96.4, 74.3, 55.5, 40.8, 26.0; IR (KBr, cm<sup>-1</sup>): ν 3391, 1713, 1626, 1417, 1384, 1354, 1275, 1261, 1091; HRMS (ESI) calcd for C<sub>17</sub>H<sub>17</sub>N<sub>3</sub>NaO<sub>4</sub><sup>+</sup> ([M+Na]<sup>+</sup>): 350.1111, found: 350.1113; HPLC analysis (Daicel Chiralcel OD-H column, λ = 254 nm, eluent: 90:10 hexane/2-propanol, flow rate: 0.9 mL/min): *t*<sub>R</sub> = 34.51 min (major), 40.09 min (minor).

**(*S,E*)-6-fluoro-3-hydroxy-1-methyl-3-(4-oxo-4-(1*H*-pyrazol-1-yl)but-2-en-1-yl)indolin-2-one (3al)**

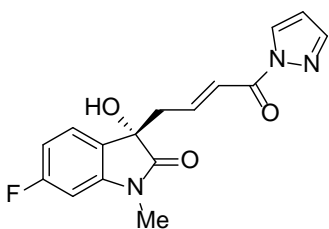

White solid, 61.3 mg, 97% yield, 96% ee; mp 182.9-183.7 °C;  $[\alpha]_{\text{D}}^{20}$  -12.7 (*c* 0.47, CH<sub>2</sub>Cl<sub>2</sub>); <sup>1</sup>H NMR (400 MHz, CDCl<sub>3</sub>): δ 8.29 (d, *J* = 2.8 Hz, 1H), 7.71 (d, *J* = 0.8 Hz, 1H), 7.36-7.30 (m, 2H), 7.25-7.18 (m, 1H), 6.80- 6.75 (m, 1H), 6.59 (dd, *J*<sub>1</sub> = 8.8 Hz, *J*<sub>2</sub> = 2.4 Hz, 1H), 6.45 (dd, *J*<sub>1</sub> = 2.8 Hz, *J*<sub>2</sub> = 1.6 Hz,

1H), 3.47 (brs, 1H), 3.18 (s, 3H), 3.04 (ddd,  $J_1 = 14.0$  Hz,  $J_2 = 6.4$  Hz,  $J_3 = 1.2$  Hz, 1H), 2.86-2.81 (m, 1H);  $^{13}\text{C}\{^1\text{H}\}$  NMR (100 MHz,  $\text{CDCl}_3$ ):  $\delta$  177.4, 164.1(d,  $J = 246.3$  Hz), 162.5, 144.8, 144.3, 144.0, 128.7, 125.7 (d,  $J = 9.8$  Hz), 124.5 (d,  $J = 3.1$  Hz), 123.9, 110.0, 109.4 (d,  $J = 22.4$  Hz), 97.9, 75.2, 41.5, 26.5; IR (KBr,  $\text{cm}^{-1}$ ):  $\nu$  3396, 1713, 1614, 1505, 1384, 1354, 1197, 1133, 1076; HRMS (ESI) calcd for  $\text{C}_{16}\text{H}_{14}\text{FN}_3\text{NaO}_3^+$  ( $[\text{M}+\text{Na}]^+$ ): 338.0911, found: 338.0907; HPLC analysis (Daicel Chiralpak AS-H column,  $\lambda = 254$  nm, eluent: 90:10 hexane/EtOH, flow rate: 0.7 mL/min):  $t_{\text{R}} = 19.57$  min (major), 30.82 min (minor).

**(*S,E*)-6-chloro-3-hydroxy-1-methyl-3-(4-oxo-4-(1*H*-pyrazol-1-yl)but-2-en-1-yl)indolin-2-one (3am)**

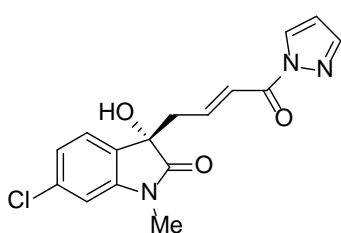

White solid, 61.8 mg, 93% yield, 93% ee; mp 138.0-139.5 °C;  $[\alpha]_{\text{D}}^{20} -59.7$  ( $c$  0.38,  $\text{CH}_2\text{Cl}_2$ );  $^1\text{H}$  NMR (400 MHz,  $\text{DMSO-d}_6$ ):  $\delta$  8.44 (d,  $J = 2.8$  Hz, 1H), 7.90 (d,  $J = 0.8$  Hz, 1H), 7.31 (d,  $J = 8.0$  Hz, 1H), 7.22-7.12 (m, 3H), 7.10 (dd,  $J_1 = 8.0$  Hz,  $J_2 = 1.6$  Hz, 1H), 6.63 (dd,  $J_1 = 2.8$  Hz,  $J_2 = 1.6$  Hz, 1H), 6.44 (s, 1H), 3.11 (s, 3H), 2.91 (dd,  $J_1 = 14.0$  Hz,  $J_2 = 5.6$  Hz, 1H), 2.81 (dd,  $J_1 = 14.0$  Hz,  $J_2 = 6.4$  Hz, 1H);  $^{13}\text{C}\{^1\text{H}\}$  NMR (100 MHz,  $\text{DMSO-d}_6$ ):  $\delta$  176.6, 162.1, 146.4, 144.6, 144.6, 134.0, 129.5, 129.1, 125.3, 122.4, 122.1, 110.7, 109.3, 74.3, 40.4, 26.2; IR (KBr,  $\text{cm}^{-1}$ ):  $\nu$  3372, 3005, 1713, 1643, 1463, 1385, 1275, 1260, 1199, 1115, 764; HRMS (ESI) calcd for  $\text{C}_{16}\text{H}_{14}^{35}\text{ClN}_3\text{NaO}_3^+$  ( $[\text{M}+\text{Na}]^+$ ): 354.0616, found: 354.0618; HPLC analysis (Daicel Chiralpak AS-H column,  $\lambda = 254$  nm, eluent: 90:10 hexane/EtOH, flow rate: 0.7 mL/min):  $t_{\text{R}} = 29.34$  min (major), 42.58 min (minor).

**(*S,E*)-6-bromo-3-hydroxy-1-methyl-3-(4-oxo-4-(1*H*-pyrazol-1-yl)but-2-en-1-yl)indolin-2-one (3an)**

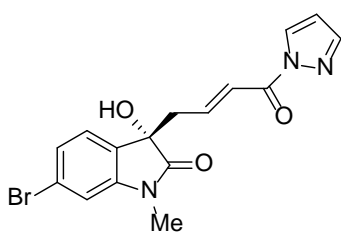

White solid, 61.9 mg, 82% yield, 90% ee; mp 178.5-179.4 °C;  $[\alpha]_{\text{D}}^{20} -25.8$  ( $c$  0.51,  $\text{CH}_2\text{Cl}_2$ );  $^1\text{H}$  NMR (400 MHz,  $\text{CDCl}_3$ ):  $\delta$  8.27 (d,  $J = 2.8$  Hz, 1H), 7.69 (d,  $J = 0.8$  Hz, 1H), 7.31 (d,  $J = 15.6$  Hz, 1H), 7.26-7.18 (m, 3H), 6.98 (d,  $J = 1.2$  Hz, 1H), 6.44 (dd,  $J_1 = 2.8$  Hz,  $J_2 = 1.2$  Hz, 1H), 4.19 (brs, 1H), 3.15 (s, 3H), 3.04 (ddd,  $J_1 = 14.0$  Hz,  $J_2 = 6.8$  Hz,  $J_3 = 0.8$  Hz, 1H), 2.81 (dd,  $J_1 = 14.0$  Hz,  $J_2 = 7.6$  Hz, 1H);  $^{13}\text{C}\{^1\text{H}\}$  NMR (100 MHz,  $\text{CDCl}_3$ ):  $\delta$  177.2, 162.4, 144.3, 144.2, 144.0, 128.7, 128.1, 126.1, 125.6, 123.8, 123.6, 112.2, 110.0, 75.3, 41.3, 26.4; IR (KBr,  $\text{cm}^{-1}$ ):  $\nu$  3390, 1712, 1607, 1417, 1385, 1354, 1275, 1261, 764, 750; HRMS (ESI) calcd for  $\text{C}_{16}\text{H}_{14}^{79}\text{BrN}_3\text{NaO}_3^+$  ( $[\text{M}+\text{Na}]^+$ ): 398.0111, found: 398.0110; HPLC analysis (Daicel Chiralcel OD-H column,  $\lambda = 254$  nm, eluent: 90:10 hexane/2-propanol, flow rate:



0.9 mL/min):  $t_R = 31.35$  min (major), 34.43 min (minor).

**(*S,E*)-3-hydroxy-1,7-dimethyl-3-(4-oxo-4-(1*H*-pyrazol-1-yl)but-2-en-1-yl)indolin-2-one (3ao)**

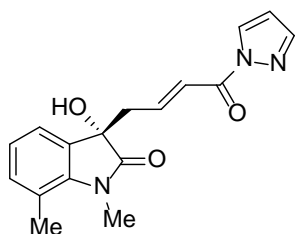

White solid, 50.3 mg, 81% yield, 96% ee; mp 137.6-137.6 °C;  $[\alpha]_D^{20} -13.7$  ( $c$  0.48,  $\text{CH}_2\text{Cl}_2$ );  $^1\text{H}$  NMR (400 MHz,  $\text{CDCl}_3$ ):  $\delta$  8.26 (d,  $J = 2.8$  Hz, 1H), 7.67 (d,  $J = 0.4$  Hz, 1H), 7.31-7.27 (m, 1H), 7.25-7.18 (m, 2H), 7.04 (d,  $J = 7.6$  Hz, 1H), 6.96 (t,  $J = 7.6$  Hz, 1H), 6.42 (dd,  $J_1 = 2.8$  Hz,  $J_2 = 1.6$  Hz, 1H), 4.16 (brs, 1H), 3.43 (s, 3H), 3.05-3.00 (m, 1H), 2.86 (dd,  $J_1 = 14.0$  Hz,  $J_2 = 8.0$  Hz, 1H), 2.52 (s, 3H);  $^{13}\text{C}\{^1\text{H}\}$  NMR (100 MHz,  $\text{CDCl}_3$ ):  $\delta$  178.0, 162.5, 144.9, 143.8, 140.5, 133.6, 129.9, 128.6, 123.3, 123.2, 122.1, 120.3, 109.8, 74.9, 41.8, 29.7, 18.9; IR (KBr,  $\text{cm}^{-1}$ ):  $\nu$  3390, 1712, 1385, 1353, 1274, 1261, 1197, 1077; HRMS (ESI) calcd for  $\text{C}_{17}\text{H}_{17}\text{N}_3\text{NaO}_3^+$  ( $[\text{M}+\text{Na}]^+$ ): 334.1162, found: 334.1166; HPLC analysis (Daicel Chiralpak AS-H column,  $\lambda = 254$  nm, eluent: 90:10 hexane/EtOH, flow rate: 0.7 mL/min):  $t_R = 33.76$  min (major), 54.40 min (minor).

**(*S,E*)-7-fluoro-3-hydroxy-1-methyl-3-(4-oxo-4-(1*H*-pyrazol-1-yl)but-2-en-1-yl)indolin-2-one (3ap)**

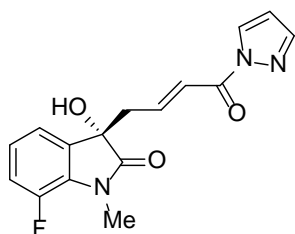

White solid, 58.6 mg, 93% yield, 89% ee; mp 154.2-154.3 °C;  $[\alpha]_D^{20} +17.1$  ( $c$  0.42,  $\text{CH}_2\text{Cl}_2$ );  $^1\text{H}$  NMR (400 MHz,  $\text{CDCl}_3$ ):  $\delta$  8.27 (d,  $J = 2.8$  Hz, 1H), 7.69 (d,  $J = 0.8$  Hz, 1H), 7.31 (d,  $J = 15.6$  Hz, 1H), 7.23-7.12 (m, 2H), 7.02 (dt,  $J_1 = 8.8$  Hz,  $J_2 = 2.4$  Hz, 1H), 6.77 (dd,  $J_1 = 8.4$  Hz,  $J_2 = 4.0$  Hz, 1H), 6.44 (dd,  $J_1 = 2.8$  Hz,  $J_2 = 1.6$  Hz, 1H), 4.44 (brs, 1H), 3.17 (s, 3H), 3.05 (ddd,  $J_1 = 14.4$  Hz,  $J_2 = 6.8$  Hz,  $J_3 = 1.2$  Hz, 1H), 2.89-2.84 (m, 1H);  $^{13}\text{C}\{^1\text{H}\}$  NMR (100 MHz,  $\text{CDCl}_3$ ):  $\delta$  177.2, 162.4, 159.5 (d,  $J = 240.9$  Hz), 144.2, 144.0, 138.7 (d,  $J = 1.9$  Hz), 130.9 (d,  $J = 7.9$  Hz), 128.7, 123.9, 116.1 (d,  $J = 23.5$  Hz), 112.5 (d,  $J = 24.9$  Hz), 109.9, 109.4, 75.8, 41.4, 26.4; IR (KBr,  $\text{cm}^{-1}$ ):  $\nu$  3382, 1712, 1643, 1623, 1495, 1385, 1354, 1275, 1198, 1105; HRMS (ESI) calcd for  $\text{C}_{16}\text{H}_{14}\text{FN}_3\text{NaO}_3^+$  ( $[\text{M}+\text{Na}]^+$ ): 338.0911, found: 338.0903; HPLC analysis (Daicel Chiralpak AS-H column,  $\lambda = 254$  nm, eluent: 90:10 hexane/EtOH, flow rate: 0.7 mL/min):  $t_R = 26.50$  min (major), 42.25 min (minor).

**(*S,E*)-7-chloro-3-hydroxy-1-methyl-3-(4-oxo-4-(1*H*-pyrazol-1-yl)but-2-en-1-yl)indolin-2-one (3aq)**

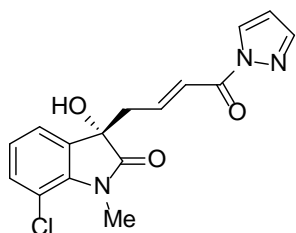

White solid, 56.4 mg, 85% yield, 84% ee; mp 116.3-118.1 °C;  $[\alpha]_{\text{D}}^{20} +45.3$  (*c* 0.23, CH<sub>2</sub>Cl<sub>2</sub>); <sup>1</sup>H NMR (400 MHz, CDCl<sub>3</sub>): δ 8.27 (d, *J* = 2.8 Hz, 1H), 7.68 (s, 1H), 7.32-7.18 (m, 4H), 7.00 (t, *J* = 8.0 Hz, 1H), 6.44 (dd, *J*<sub>1</sub> = 2.8 Hz, *J*<sub>2</sub> = 1.6 Hz, 1H), 4.64 (brs, 1H), 3.54 (s, 3H), 3.04 (dd, *J*<sub>1</sub> = 14.0 Hz, *J*<sub>2</sub> = 6.0 Hz, 1H), 2.83 (dd, *J*<sub>1</sub> = 14.0 Hz, *J*<sub>2</sub> = 8.0 Hz, 1H); <sup>13</sup>C{<sup>1</sup>H} NMR (100 MHz, CDCl<sub>3</sub>): δ 177.8, 162.4, 144.3, 143.9, 138.7, 132.1, 132.1, 128.7, 124.2, 123.8, 122.8, 116.1, 110.0, 75.1, 41.5, 29.7; IR (KBr, cm<sup>-1</sup>): ν 3391, 1713, 1611, 1495, 1385, 1354, 1275, 1201, 1070, 932; HRMS (ESI) calcd for C<sub>16</sub>H<sub>14</sub><sup>35</sup>ClN<sub>3</sub>NaO<sub>3</sub><sup>+</sup> ([M+Na]<sup>+</sup>): 354.0616, found: 354.0620; HPLC analysis (Daicel Chiralpak AS-H column, λ = 254 nm, eluent: 90:10 hexane/EtOH, flow rate: 0.7 mL/min): *t*<sub>R</sub> = 22.00 min (major), 29.08 min (minor).

**(*S,E*)-7-bromo-3-hydroxy-1-methyl-3-(4-oxo-4-(1*H*-pyrazol-1-yl)but-2-en-1-yl)indolin-2-one (3ar)**

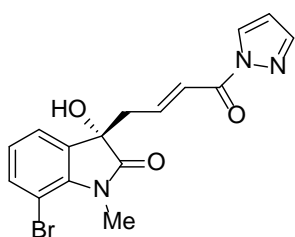

White solid, 61.5 mg, 82% yield, 85% ee; mp 130.1-130.5 °C;  $[\alpha]_{\text{D}}^{20} -12.7$  (*c* 0.33, CH<sub>2</sub>Cl<sub>2</sub>); <sup>1</sup>H NMR (400 MHz, CDCl<sub>3</sub>): δ 8.28 (d, *J* = 2.8 Hz, 1H), 7.69 (d, *J* = 0.8 Hz, 1H), 7.43 (dd, *J*<sub>1</sub> = 8.4 Hz, *J*<sub>2</sub> = 1.2 Hz, 1H), 7.33 (dd, *J*<sub>1</sub> = 7.2 Hz, *J*<sub>2</sub> = 0.8 Hz, 1H), 7.28 (d, *J* = 6.4 Hz, 1H), 7.26-7.18 (m, 1H), 6.94 (t, *J* = 7.6 Hz, 1H), 6.44 (dd, *J*<sub>1</sub> = 2.8 Hz, *J*<sub>2</sub> = 1.6 Hz, 1H), 4.22 (brs, 1H), 3.57 (s, 3H), 3.05-3.00 (m, 1H), 2.83 (dd, *J*<sub>1</sub> = 14.4 Hz, *J*<sub>2</sub> = 8.0 Hz, 1H); <sup>13</sup>C{<sup>1</sup>H} NMR (100 MHz, CDCl<sub>3</sub>): δ 177.9, 162.4, 144.2, 144.30, 140.2, 135.5, 132.4, 128.7, 124.6, 123.9, 123.4, 109.9, 102.9, 75.0, 41.6, 30.0; IR (KBr, cm<sup>-1</sup>): ν 3363, 3005, 1713, 1643, 1458, 1385, 1275, 1261, 1199, 1099, 764; HRMS (ESI) calcd for C<sub>16</sub>H<sub>14</sub><sup>79</sup>BrN<sub>3</sub>NaO<sub>3</sub><sup>+</sup> ([M+Na]<sup>+</sup>): 398.0111, found: 398.0105; HPLC analysis (Daicel Chiralpak AS-H column, λ = 254 nm, eluent: 90:10 hexane/EtOH, flow rate: 0.7 mL/min): *t*<sub>R</sub> = 22.32 min (major), 29.24 min (minor).

**(*S,E*)-3-hydroxy-1,5,7-trimethyl-3-(4-oxo-4-(1*H*-pyrazol-1-yl)but-2-en-1-yl)indolin-2-one (3as)**

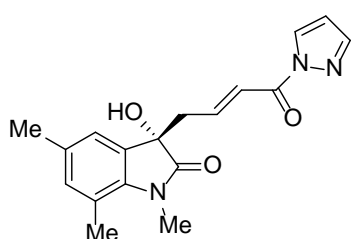

White solid, 53.6 mg, 82% yield, 97% ee; mp 169.7-170.7 °C;  $[\alpha]_{\text{D}}^{20} +34.7$  (*c* 0.50, CH<sub>2</sub>Cl<sub>2</sub>); <sup>1</sup>H NMR (400 MHz, CDCl<sub>3</sub>): δ 8.27 (d, *J* = 2.8 Hz, 1H), 7.69 (d, *J* = 0.8 Hz, 1H), 7.30 (d, *J* = 15.6 Hz, 1H), 7.21-7.14 (m, 1H), 7.05 (s, 1H), 6.85 (s, 1H), 6.43 (dd, *J*<sub>1</sub> = 2.8 Hz, *J*<sub>2</sub> = 1.6 Hz, 1H), 3.96 (brs, 1H), 3.41 (s, 3H), 3.00 (ddd, *J*<sub>1</sub> = 14.4 Hz, *J*<sub>2</sub> = 6.8 Hz, *J*<sub>3</sub> = 1.2 Hz, 1H), 2.91-2.85

(m, 1H), 2.48 (s, 3H), 2.26 (s, 3H);  $^{13}\text{C}\{^1\text{H}\}$  NMR (100 MHz,  $\text{CDCl}_3$ ):  $\delta$  177.8, 162.5, 145.2, 143.8, 138.1, 134.1, 132.8, 130.0, 128.6, 123.3, 122.7, 120.0, 109.8, 75.0, 41.8, 29.6, 20.7, 18.7; IR (KBr,  $\text{cm}^{-1}$ ):  $\nu$  3312, 2922, 1713, 1690, 1640, 1385, 1275, 1261, 764; HRMS (ESI) calcd for  $\text{C}_{18}\text{H}_{20}\text{N}_3\text{O}_3^+$  ( $[\text{M}+\text{H}]^+$ ): 326.1499, found: 326.1501; HPLC analysis (Daicel Chiralpak AS-H column,  $\lambda = 254$  nm, eluent: 90:10 hexane/EtOH, flow rate: 0.7 mL/min):  $t_{\text{R}} = 115.27$  min (major), 107.91 min (minor).

**(*S,E*)-5-bromo-3-hydroxy-3-(4-oxo-4-(1*H*-pyrazol-1-yl)but-2-en-1-yl)indolin-2-one (3at)**

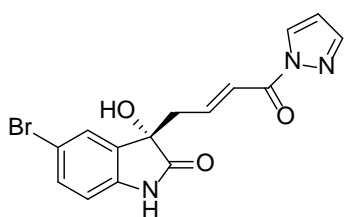

White solid, 57.8 mg, 80% yield, 82% ee; mp 157.3-157.9 °C;  $[\alpha]_{\text{D}}^{20} +7.3$  ( $c$  0.49,  $\text{CH}_2\text{Cl}_2$ );  $^1\text{H}$  NMR (400 MHz,  $\text{DMSO-d}_6$ ):  $\delta$  10.51 (s, 1H), 8.44 (d,  $J = 2.8$  Hz, 1H), 7.91 (d,  $J = 1.2$  Hz, 1H), 7.45 (d,  $J = 2.0$  Hz, 1H), 7.40 (dd,  $J_1 = 8.4$  Hz,  $J_2 = 2.0$  Hz, 1H), 7.22 (d,  $J = 15.6$  Hz, 1H), 7.10-7.02 (m, 1H), 6.79 (d,  $J = 8.4$  Hz, 1H), 6.64 (dd,  $J_1 = 2.8$  Hz,  $J_2 = 1.6$  Hz, 1H), 6.41 (s, 1H), 2.92 (ddd,  $J_1 = 14.4$  Hz,  $J_2 = 6.8$  Hz,  $J_3 = 1.2$  Hz, 1H), 2.84 (dd,  $J_1 = 14.4$  Hz,  $J_2 = 7.6$  Hz, 1H);  $^{13}\text{C}\{^1\text{H}\}$  NMR (100 MHz,  $\text{DMSO-d}_6$ ):  $\delta$  177.8, 162.2, 146.4, 144.6, 140.8, 133.8, 132.1, 129.1, 127.2, 122.4, 113.5, 111.9, 110.7, 75.0, 40.4; IR (KBr,  $\text{cm}^{-1}$ ):  $\nu$  3282, 2359, 1714, 1642, 1385, 1355, 1275, 1261, 1197, 764; HRMS (ESI) calcd for  $\text{C}_{15}\text{H}_{12}^{79}\text{BrN}_3\text{NaO}_3^+$  ( $[\text{M}+\text{Na}]^+$ ): 383.9954, found: 383.9952; HPLC analysis (Daicel Chiralcel OD-H column,  $\lambda = 254$  nm, eluent: 90:10 hexane/2-propanol, flow rate: 0.9 mL/min):  $t_{\text{R}} = 24.44$  min (major), 27.72 min (minor).

**(*S,E*)-3-hydroxy-6-methyl-3-(4-oxo-4-(1*H*-pyrazol-1-yl)but-2-en-1-yl)indolin-2-one (3au)**

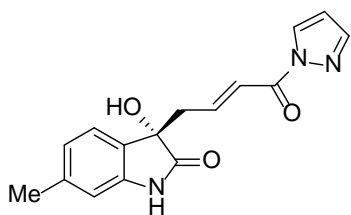

White solid, 47.5 mg, 80% yield, 96% ee; mp 166.6-167.2 °C;  $[\alpha]_{\text{D}}^{20} +19.4$  ( $c$  0.41,  $\text{CH}_2\text{Cl}_2$ );  $^1\text{H}$  NMR (400 MHz,  $\text{DMSO-d}_6$ ):  $\delta$  10.32 (s, 1H), 8.43 (d,  $J = 2.8$  Hz, 1H), 7.90 (d,  $J = 0.8$  Hz, 1H), 7.22-7.16 (m, 2H), 7.12-7.07 (m, 1H), 6.63 (dd,  $J_1 = 2.8$  Hz,  $J_2 = 1.6$  Hz, 1H), 6.52 (dd,  $J_1 = 8.0$  Hz,  $J_2 = 2.0$  Hz, 1H), 6.37 (d,  $J = 2.0$  Hz, 1H), 6.16 (s, 1H), 3.72 (s, 3H), 2.88 (dd,  $J_1 = 14.4$  Hz,  $J_2 = 6.4$  Hz, 1H), 2.76 (dd,  $J_1 = 14.0$  Hz,  $J_2 = 8.0$  Hz, 1H),  $^{13}\text{C}\{^1\text{H}\}$  NMR (100 MHz,  $\text{DMSO-d}_6$ ):  $\delta$  178.8, 162.2, 160.5, 147.2, 144.6, 142.8, 129.2, 125.2, 123.2, 122.1, 110.7, 106.5, 96.8, 74.7, 55.3, 40.9; IR (KBr,  $\text{cm}^{-1}$ ):  $\nu$  3381, 2923, 1712, 1642, 1499, 1385, 1198, 1095, 933; HRMS (ESI) calcd for  $\text{C}_{16}\text{H}_{15}\text{N}_3\text{NaO}_3^+$  ( $[\text{M}+\text{Na}]^+$ ): 320.1006, found: 320.1011; HPLC analysis (Daicel Chiralpak AS-H column,  $\lambda = 254$  nm, eluent: 90:10 hexane/EtOH, flow rate: 0.7 mL/min):  $t_{\text{R}} = 97.87$  min (major), 139.61 min (minor).

**(*S,E*)-6-fluoro-3-hydroxy-3-(4-oxo-4-(1*H*-pyrazol-1-yl)but-2-en-1-yl)indolin-2-one**

**(3av)**

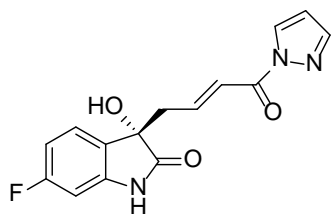

White solid, 58.9 mg, 98% yield, 84% ee; mp 176.5-176.6 °C;  $[\alpha]_D^{20} +23.6$  (*c* 0.37, CH<sub>2</sub>Cl<sub>2</sub>); <sup>1</sup>H NMR (400 MHz, DMSO-d<sub>6</sub>): δ 10.54 (s, 1H), 8.43 (d, *J* = 2.8 Hz, 1H), 7.9 (s, 1H), 7.29 (dd, *J*<sub>1</sub> = 8.0 Hz, *J*<sub>2</sub> = 5.6 Hz, 1H), 7.2 (d, *J* = 15.6 Hz, 1H), 7.13-7.06 (m, 1H), 6.80-6.75 (m, 1H), 6.66-6.63 (m, 2H), 6.34 (s, 1H), 2.90 (dd, *J*<sub>1</sub> = 14.4 Hz, *J*<sub>2</sub> = 6.4 Hz, 1H), 2.80 (dd, *J*<sub>1</sub> = 14.0 Hz, *J*<sub>2</sub> = 8.0 Hz, 1H); <sup>13</sup>C{<sup>1</sup>H} NMR (100 MHz, DMSO-d<sub>6</sub>): δ 178.6, 162.9 (d, *J* = 241.5 Hz), 162.2, 146.7, 144.7, 143.3 (d, *J* = 12.4 Hz), 129.2, 127.3 (d, *J* = 2.6 Hz), 125.9 (d, *J* = 10.0 Hz), 122.3, 110.8, 108.0 (d, *J* = 22.3 Hz), 98.3, 74.6, 40.6; IR (KBr, cm<sup>-1</sup>): ν 3281, 1721, 1626, 1386, 1275, 1141, 930, 764; HRMS (ESI) calcd for C<sub>15</sub>H<sub>12</sub>FN<sub>3</sub>NaO<sub>3</sub><sup>+</sup> ([M+Na]<sup>+</sup>): 324.0755, found: 324.0758; Daicel Chiralpak AS-H column, λ = 254 nm, eluent: 90:10 hexane/EtOH, flow rate: 0.7 mL/min): *t*<sub>R</sub> = 105.75 min (major), 74.61 min (minor).

**(*S,E*)-6-chloro-3-hydroxy-3-(4-oxo-4-(1*H*-pyrazol-1-yl)but-2-en-1-yl)indolin-2-one**

**(3aw)**

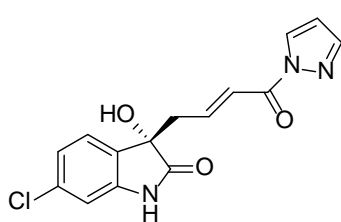

White solid, 57.4 mg, 90% yield, 90% ee; mp 181.7-182.9 °C;  $[\alpha]_D^{20} +13.3$  (*c* 0.45, CH<sub>2</sub>Cl<sub>2</sub>); <sup>1</sup>H NMR (400 MHz, DMSO-d<sub>6</sub>): δ 10.53 (s, 1H), 8.43 (d, *J* = 2.8 Hz, 1H), 7.90 (d, *J* = 0.8 Hz, 1H), 7.28 (d, *J* = 8.0 Hz, 1H), 7.21 (d, *J* = 15.6 Hz, 1H), 7.14-7.06 (m, 1H), 7.03 (dd, *J*<sub>1</sub> = 8.0 Hz, *J*<sub>2</sub> = 2.0 Hz, 1H), 6.84 (d, *J* = 2.0 Hz, 1H), 6.63 (dd, *J*<sub>1</sub> = 2.8 Hz, *J*<sub>2</sub> = 1.6 Hz, 1H), 6.38 (s, 1H), 2.93-2.87 (m, 1H), 2.80 (dd, *J*<sub>1</sub> = 14.4 Hz, *J*<sub>2</sub> = 8.0 Hz, 1H); <sup>13</sup>C{<sup>1</sup>H} NMR (100 MHz, DMSO-d<sub>6</sub>): δ 178.3, 162.2, 146.5, 144.6, 143.0, 133.6, 130.2, 129.1, 125.8, 122.4, 121.6, 110.7, 110.0, 74.6, 40.5; IR (KBr, cm<sup>-1</sup>): ν 3006, 1715, 1385, 1275, 1261, 1197, 1133, 1076, 764, 750; HRMS (ESI) calcd for C<sub>15</sub>H<sub>12</sub><sup>35</sup>ClN<sub>3</sub>NaO<sub>3</sub><sup>+</sup> ([M+Na]<sup>+</sup>): 340.0459, found: 340.0451; HPLC analysis (Daicel Chiralpak AS-H column, λ = 254 nm, eluent: 90:10 hexane/EtOH, flow rate: 0.7 mL/min): *t*<sub>R</sub> = 23.19 min (major), 35.14 min (minor).

**(*S,E*)-6-bromo-3-hydroxy-3-(4-oxo-4-(1*H*-pyrazol-1-yl)but-2-en-1-yl)indolin-2-one**

**(3ax)**

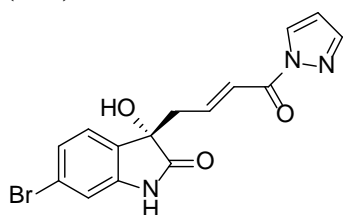

White solid, 55.2 mg, 76% yield, 90% ee; mp 186.6-186.8 °C;  $[\alpha]_D^{20} -22.6$  (*c* 0.52, CH<sub>2</sub>Cl<sub>2</sub>); <sup>1</sup>H NMR (400 MHz, DMSO-d<sub>6</sub>): δ 10.51 (s, 1H), 8.44 (d, *J* = 2.4 Hz, 1H), 7.90 (d, *J* = 0.8 Hz, 1H), 7.23-7.16 (m, 3H), 7.13-7.06 (m, 1H),

6.97 (d,  $J = 1.6$  Hz, 1H), 6.64 (dd,  $J_1 = 2.8$  Hz,  $J_2 = 1.6$  Hz, 1H), 6.37 (s, 1H), 2.89 (dd,  $J_1 = 14.8$  Hz,  $J_2 = 6.8$  Hz, 1H), 2.79 (dd,  $J_1 = 14.4$  Hz,  $J_2 = 8.0$  Hz, 1H);  $^{13}\text{C}\{^1\text{H}\}$  NMR (100 MHz, DMSO- $d_6$ ):  $\delta$  178.1, 162.1, 146.4, 144.6, 143.2, 130.6, 129.1, 126.1, 124.5, 122.4, 121.9, 112.7, 110.7, 74.7, 40.4; IR (KBr,  $\text{cm}^{-1}$ ):  $\nu$  3313, 1715, 1612, 1385, 1354, 1275, 1261, 1198, 1077, 764; HRMS (ESI) calcd for  $\text{C}_{15}\text{H}_{12}^{79}\text{BrN}_3\text{NaO}_3^+$  ( $[\text{M}+\text{Na}]^+$ ): 383.9954, found: 383.9959; HPLC analysis (Daicel Chiralcel OD-H column,  $\lambda = 254$  nm, eluent: 90:10 hexane/2-propanol, flow rate: 0.9 mL/min):  $t_{\text{R}} = 25.55$  min (major), 41.26 min (minor).

**(*S,E*)-7-bromo-3-hydroxy-3-(4-oxo-4-(1*H*-pyrazol-1-yl)but-2-en-1-yl)indolin-2-one (3ay)**

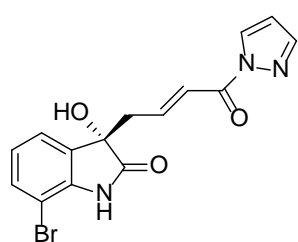

White solid, 53.4 mg, 74% yield, 79% ee; mp 131.7-131.9 °C;  $[\alpha]_{\text{D}}^{20} +37.1$  ( $c$  0.53,  $\text{CH}_2\text{Cl}_2$ );  $^1\text{H}$  NMR (400 MHz, DMSO- $d_6$ ):  $\delta$  10.69 (s, 1H), 8.44 (d,  $J = 2.4$  Hz, 1H), 7.90 (d,  $J = 0.8$  Hz, 1H), 7.42 (dd,  $J_1 = 8.0$  Hz,  $J_2 = 0.8$  Hz, 1H), 7.28 (d,  $J = 7.2$  Hz, 1H), 7.22 (d,  $J = 15.6$  Hz, 1H), 7.16-7.09 (m, 1H), 6.95 (t,  $J = 8.0$  Hz, 1H), 6.64 (dd,  $J_1 = 2.4$  Hz,  $J_2 = 1.2$  Hz, 1H), 6.44 (s, 1H), 2.93-2.88 (m, 1H), 2.82 (dd,  $J_1 = 14.4$  Hz,  $J_2 = 7.6$  Hz, 1H);  $^{13}\text{C}\{^1\text{H}\}$  NMR (100 MHz, DMSO- $d_6$ ):  $\delta$  178.2, 162.2, 146.5, 144.6, 140.9, 133.3, 132.2, 129.2, 123.7, 123.4, 122.4, 110.7, 102.3, 75.7, 40.6; IR (KBr,  $\text{cm}^{-1}$ ):  $\nu$  3285, 1721, 1626, 1502, 1461, 1386, 1275, 1200, 1141, 765; HRMS (ESI) calcd for  $\text{C}_{15}\text{H}_{12}^{79}\text{BrN}_3\text{NaO}_3^+$  ( $[\text{M}+\text{Na}]^+$ ): 383.9954, found: 383.9956; HPLC analysis (Daicel Chiralcel OD-H column,  $\lambda = 254$  nm, eluent: 90:10 hexane/2-propanol, flow rate: 0.9 mL/min):  $t_{\text{R}} = 19.26$  min (major), 31.11 min (minor).

**(*S,E*)-3-(4-(3,5-dimethyl-1*H*-pyrazol-1-yl)-4-oxobut-2-en-1-yl)-3-hydroxy-1-methylindolin-2-one (3ba)**

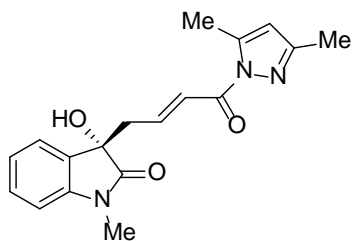

White solid, 60.3 mg, 93% yield, 81% ee; mp 175.6-177.3 °C;  $[\alpha]_{\text{D}}^{20} +12.1$  ( $c$  0.42,  $\text{CH}_2\text{Cl}_2$ );  $^1\text{H}$  NMR (400 MHz,  $\text{CDCl}_3$ ):  $\delta$  7.40 (d,  $J = 7.2$  Hz, 1H), 7.34-7.30 (m, 2H), 7.12-7.04 (m, 2H), 6.83 (dd,  $J_1 = 7.6$  Hz,  $J_2 = 4.0$  Hz, 1H), 5.95 (s, 1H), 4.17 (brs, 1H), 3.18 (d,  $J = 7.2$  Hz, 3H), 3.04 (ddd,  $J_1 = 14.0$  Hz,  $J_2 = 6.8$  Hz,  $J_3 = 1.2$  Hz, 1H), 2.81 (dd,  $J_1 = 14.0$  Hz,  $J_2 = 8.0$  Hz, 1H), 2.52 (s, 3H), 2.21 (s, 3H);  $^{13}\text{C}\{^1\text{H}\}$  NMR (100 MHz,  $\text{CDCl}_3$ ):  $\delta$  177.2, 164.4, 151.9, 144.3, 143.0, 142.5, 129.9, 129.1, 125.5, 124.3, 123.3, 111.4, 108.6, 75.6, 41.4, 26.3, 14.5, 13.7; IR (KBr,  $\text{cm}^{-1}$ ):  $\nu$  3391, 2924, 1712, 1643, 1614, 1468, 1385, 1354, 1275, 1197, 1078; HRMS (ESI) calcd for  $\text{C}_{18}\text{H}_{19}\text{N}_3\text{NaO}_3^+$  ( $[\text{M}+\text{Na}]^+$ ): 348.1319, found: 348.1322; HPLC

analysis (Daicel Chiralpak AS-H column,  $\lambda = 254$  nm, eluent: 90:10 hexane/EtOH, flow rate: 0.7 mL/min):  $t_R = 38.77$  min (major), 33.95 min (minor).

**(*S,E*)-3-(4-(3,5-diphenyl-1*H*-pyrazol-1-yl)-4-oxobut-2-en-1-yl)-3-hydroxy-1-methylindolin-2-one (3ca)**

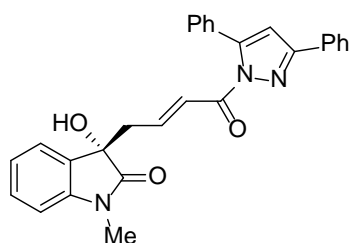

White solid, 79.2 mg, 88% yield, 92% ee; mp 187.3-187.5 °C;  $[\alpha]_D^{20} +7.9$  (*c* 0.60, CH<sub>2</sub>Cl<sub>2</sub>); <sup>1</sup>H NMR (400 MHz, CDCl<sub>3</sub>):  $\delta$  7.90-7.88 (m, 2H), 7.53 (d, *J* = 15.6 Hz, 1H), 7.47-7.38 (m, 9H), 7.32 (dt, *J*<sub>1</sub> = 8.0 Hz, *J*<sub>2</sub> = 0.8 Hz, 1H), 7.10-6.99 (m, 2H), 6.82 (d, *J* = 8.0 Hz, 1H), 6.72 (s, 1H), 3.28 (s, 1H), 3.17 (s, 3H), 3.08 (ddd, *J*<sub>1</sub> = 14.0 Hz, *J*<sub>2</sub> = 6.8 Hz, *J*<sub>3</sub> = 1.2 Hz, 1H), 2.88 (ddd, *J*<sub>1</sub> = 14.0 Hz, *J*<sub>2</sub> = 8.4 Hz, *J*<sub>3</sub> = 0.4 Hz, 1H); <sup>13</sup>C{<sup>1</sup>H} NMR (100 MHz, CDCl<sub>3</sub>):  $\delta$  177.1, 163.5, 153.4, 147.5, 143.3, 143.0, 131.6, 131.2, 130.0, 129.2, 128.9, 128.7, 127.8, 126.3, 125.5, 124.3, 123.3, 110.1, 108.7, 75.6, 41.5, 26.3; IR (KBr, cm<sup>-1</sup>):  $\nu$  3331, 2351, 1701, 1621, 1381, 1351, 1091, 1071, 930, 779; HRMS (ESI) calcd for C<sub>28</sub>H<sub>23</sub>N<sub>3</sub>NaO<sub>3</sub><sup>+</sup> ([M+Na]<sup>+</sup>): 472.1632, found: 472.1637; HPLC analysis (Daicel Chiralpak AS-H column,  $\lambda = 254$  nm, eluent: 90:10 hexane/EtOH, flow rate: 0.7 mL/min):  $t_R = 59.25$  min (major), 32.11 min (minor).

**(*S,E*)-3-(4-(1*H*-benzo[*d*][1,2,3]triazol-1-yl)-4-oxobut-2-en-1-yl)-3-hydroxy-1-methylindolin-2-one (3da)**

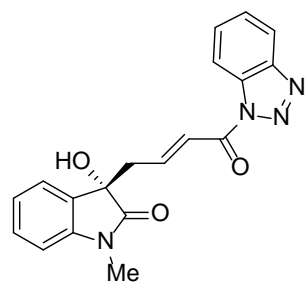

White solid, 63.9 mg, 92% yield, 88% ee; mp 173.5-175.1 °C;  $[\alpha]_D^{20} +41.8$  (*c* 0.42, CH<sub>2</sub>Cl<sub>2</sub>); <sup>1</sup>H NMR (400 MHz, CDCl<sub>3</sub>):  $\delta$  8.30 (d, *J* = 8.4 Hz, 1H), 8.10 (d, *J* = 8.0 Hz, 1H), 7.66-7.62 (m, 1H), 7.56-7.40 (m, 4H), 7.34 (dt, *J*<sub>1</sub> = 8.0 Hz, *J*<sub>2</sub> = 0.8 Hz, 1H), 7.11 (t, *J* = 7.2 Hz, 1H), 6.87 (d, *J* = 8.0 Hz, 1H), 3.70 (s, 1H), 3.22 (s, 3H), 3.14 (ddd, *J*<sub>1</sub> = 14.0 Hz, *J*<sub>2</sub> = 6.8 Hz, *J*<sub>3</sub> = 0.8 Hz, 1H), 2.94 (dd, *J*<sub>1</sub> = 14.0 Hz, *J*<sub>2</sub> = 7.6 Hz, 1H); <sup>13</sup>C{<sup>1</sup>H} NMR (100 MHz, CDCl<sub>3</sub>):  $\delta$  177.2, 162.9, 146.1, 142.9, 131.3, 130.3, 130.1, 129.0, 126.2, 124.2, 124.0, 123.4, 120.1, 114.6, 108.8, 75.6, 41.6, 26.4; IR (KBr, cm<sup>-1</sup>):  $\nu$  3382, 3005, 1705, 1639, 1615, 1471, 1377, 1353, 1275, 1261; HRMS (ESI) calcd for C<sub>19</sub>H<sub>16</sub>N<sub>4</sub>NaO<sub>3</sub><sup>+</sup> ([M+Na]<sup>+</sup>): 371.1115, found: 371.1117; HPLC analysis (Daicel Chiralpak AS-H column,  $\lambda = 254$  nm, eluent: 90:10 hexane/EtOH, flow rate: 0.7 mL/min):  $t_R = 49.99$  min (major), 56.11 min (minor).

**(3*S*)-3-hydroxy-1-methyl-3-((*E*)-5-oxo-5-(1*H*-pyrazol-1-yl)pent-3-en-2-yl)indolin-2-one (3ga)**

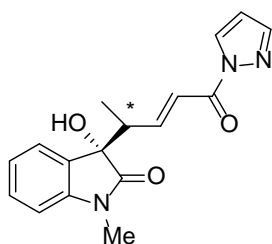

White solid, 52.9 mg, 85% yield, 98% ee, 96:4 dr; mp 146.1-147.3 °C; 96:4 dr, 98% ee;  $[\alpha]_{\text{D}}^{20}$  -46.0 (*c* 0.30, CH<sub>2</sub>Cl<sub>2</sub>); <sup>1</sup>H NMR (400 MHz, CDCl<sub>3</sub>):  $\delta$  8.26 (d, *J* = 2.8 Hz, 1H), 7.69 (d, *J* = 0.8 Hz, 1H), 7.42 (d, *J* = 7.6 Hz, 1H), 7.36-7.30 (m, 2H), 7.16-7.09 (m, 2H), 6.82 (d, *J* = 7.6 Hz, 1H), 6.43 (dd, *J*<sub>1</sub> = 1.6 Hz, *J*<sub>2</sub> = 2.8 Hz, 1H), 3.19-3.11 (m, 4H), 1.21 (d, *J* = 6.8 Hz, 3H); <sup>13</sup>C{<sup>1</sup>H} NMR (100 MHz, CDCl<sub>3</sub>):  $\delta$  177.0, 162.6, 150.7, 143.9, 134.5, 130.0, 128.6, 128.4, 124.3, 123.1, 121.6, 109.8, 108.5, 78.2, 45.4, 26.1, 13.3; HRMS (EI) calcd for C<sub>14</sub>H<sub>15</sub>NO<sub>4</sub><sup>+</sup> ([M]<sup>+</sup>): 311.1264, found: 311.1267; HPLC analysis (Daicel Chiralpak AS-H column,  $\lambda$  = 254 nm, eluent: 87.5:12.5 hexane/EtOH, flow rate: 0.9 mL/min): *t*<sub>R</sub> = 31.83 min (major), 70.96 min (minor).

**3. Esterification of Product 3aa**

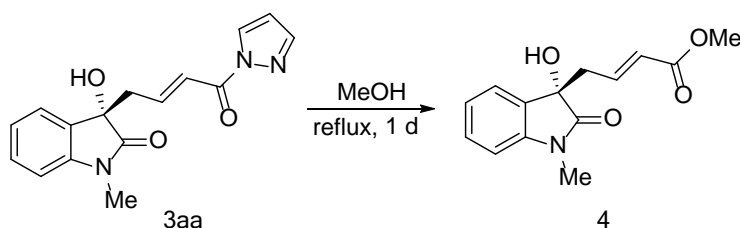

Compound **3aa** (99% ee, 0.2 mmol) and methanol (5 mL) were added to a reaction tube, and the solution was stirred under reflux for 1 day (monitored by TLC). The solvent was concentrated, and the residue was purified by column chromatography on silica gel (5:1 CH<sub>2</sub>Cl<sub>2</sub>/EtOAc) to provide product **4**.

**methyl (*S,E*)-4-(3-hydroxy-1-methyl-2-oxoindolin-3-yl)but-2-enoate (4)**

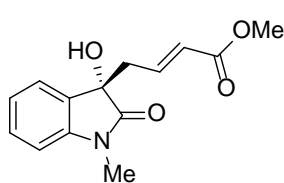

Liquid, 89.7 mg, 99% yield, 99% ee;  $[\alpha]_{\text{D}}^{20}$  -30.2 (*c* 0.31, CH<sub>2</sub>Cl<sub>2</sub>); <sup>1</sup>H NMR (400 MHz, CDCl<sub>3</sub>):  $\delta$  7.37-7.28 (m, 2H), 7.10 (t, *J* = 7.6 Hz, 1H), 6.88-6.80 (m, 2H), 5.84 (d, *J* = 15.6 Hz, 1H), 4.06 (brs, 1H), 3.68 (s, 3H), 3.15 (s, 3H), 2.91 (ddd, *J*<sub>1</sub> = 14.0 Hz, *J*<sub>2</sub> = 6.8 Hz, *J*<sub>3</sub> = 1.6 Hz, 1H), 2.68 (dd, *J*<sub>1</sub> = 14.0 Hz, *J*<sub>2</sub> = 8.4 Hz, 1H); <sup>13</sup>C{<sup>1</sup>H} NMR (100 MHz, CDCl<sub>3</sub>):  $\delta$  177.3, 166.3, 142.8, 141.2, 129.8, 129.2, 125.2, 124.1, 123.2, 108.6, 75.5, 51.5, 40.8, 26.2; IR (KBr, cm<sup>-1</sup>):  $\nu$  3370, 3058, 2950, 1701, 1612, 1468, 1276, 1090, 980, 756; HRMS (EI) calcd for C<sub>14</sub>H<sub>15</sub>NO<sub>4</sub><sup>+</sup> ([M]<sup>+</sup>): 261.0996, found: 261.1004; HPLC analysis (Daicel Chiralpak AS-H column,  $\lambda$  = 254 nm, eluent: 85:5 hexane/EtOH, flow rate: 0.9 mL/min): *t*<sub>R</sub> = 32.38 min (major), 39.73 min (minor).

#### 4. Transformation of Product 3aa to Spirolactone 6

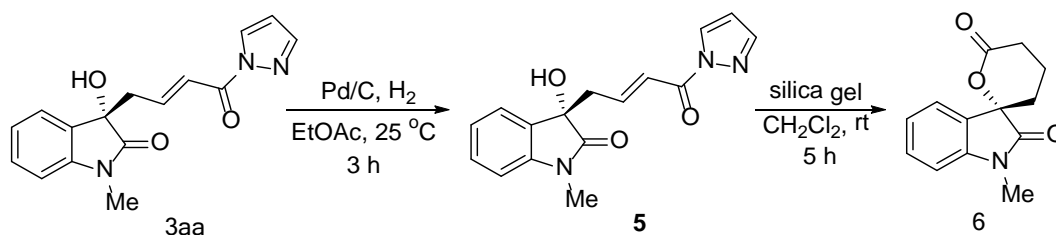

Compound **3aa** (99% ee, 0.2 mmol) was dissolved in 2 mL EtOAc, and 20 mol% Pd catalyst (10% w/w Pd/C, 42.6 mg) was added at room temperature. The mixture was stirred under an atmosphere of hydrogen for 3 hours (monitored by TLC). After the reaction was completed, the resulting mixture was filtered through a celite pad, and washed with CH<sub>2</sub>Cl<sub>2</sub>. The filtrate was concentrated, and provided product **5** with quantitative yield and excellent enantioselectivity (99% ee).

Next, compound **5** (0.2 mmol), silica gel (4.0 g) and CH<sub>2</sub>Cl<sub>2</sub> (30 mL) were added to a round bottom flask with a magnetic stir bar. The mixture was stirred at room temperature for 5 hours (monitored by TLC). After the reaction was completed, the resulting mixture was filtered through a silica pad, and washed with CH<sub>2</sub>Cl<sub>2</sub>. The filtrate was concentrated, and the residue was purified by column chromatography on silica gel (10:1 CH<sub>2</sub>Cl<sub>2</sub>/EtOAc) to provide spiro lactone **6**.

##### (S)-3-hydroxy-1-methyl-3-(4-oxo-4-(1H-pyrazol-1-yl)butyl)indolin-2-one (**5**)

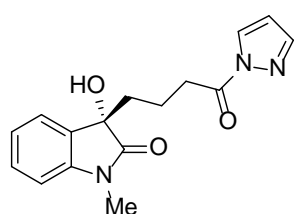

Liquid, 59.9 mg, quantitative yield, 99% ee;  $[\alpha]_D^{20}$  -30.8 (*c* 0.41, CH<sub>2</sub>Cl<sub>2</sub>); <sup>1</sup>H NMR (400 MHz, CDCl<sub>3</sub>):  $\delta$  8.10 (d, *J* = 2.8 Hz, 1H), 7.56 (s, 1H), 7.32 (d, *J* = 7.2 Hz, 1H), 7.23 (d, *J* = 7.6 Hz, 1H), 7.01 (d, *J* = 7.6 Hz, 1H), 6.74 (d, *J* = 7.6 Hz, 1H), 6.31 (t, *J* = 0.8 Hz, 1H), 3.93 (brs, 1H), 3.09 (s, 3H), 3.00 (t, *J* = 7.6 Hz, 1H), 2.06-1.91 (m, 2H), 1.62-1.51 (m, 2H); <sup>13</sup>C{<sup>1</sup>H} NMR (100 MHz, CDCl<sub>3</sub>):  $\delta$  178.2, 171.4, 143.8, 143.2, 129.9, 129.5, 128.1, 123.9, 123.1, 109.4, 108.4, 76.2, 37.4, 33.6, 26.1, 18.0; IR (KBr, cm<sup>-1</sup>):  $\nu$  3384, 3137, 3058, 2947, 1701, 1617, 1384, 1201, 1089, 922; HRMS (EI) for calcd for C<sub>16</sub>H<sub>17</sub>N<sub>3</sub>O<sub>3</sub><sup>+</sup> ([M]<sup>+</sup>): 299.1264, found: 299.1268; HPLC analysis (Daicel Chiralpak AS-H column,  $\lambda$  = 254 nm, eluent: 87.5:12.5 hexane/EtOH, flow rate: 0.9 mL/min): *t*<sub>R</sub> = 35.75 min (major), 44.19 min (minor).



### (S)-1-methyl-4',5'-dihydrospiro[indoline-3,2'-pyran]-6'(3'H)-one (6)

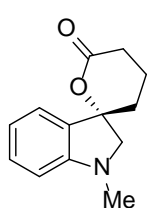

White solid, 46.1 mg, 77% yield, 99% ee; mp 158.8-162.9 °C;  $[\alpha]_D^{20}$ -98.9 (*c* 0.21, CH<sub>2</sub>Cl<sub>2</sub>); <sup>1</sup>H NMR (400 MHz, CDCl<sub>3</sub>): δ 7.39-7.34 (m, 2H), 7.11 (t, *J* = 7.6 Hz, 1H), 6.85 (d, *J* = 7.6 Hz, 1H), 3.18 (s, 3H), 2.94-2.86 (m, 1H), 2.71-2.56 (m, 2H), 2.21-2.13 (m, 1H), 2.08-2.02 (m, 1H), 1.98-1.91 (m, 1H); <sup>13</sup>C{<sup>1</sup>H} NMR (100 MHz, CDCl<sub>3</sub>): δ 173.8, 169.9, 142.9, 130.6, 128.0, 123.8, 123.3, 108.6, 81.6, 29.4, 29.3, 26.3, 15.5; IR (KBr, cm<sup>-1</sup>): ν 2960, 2920, 1720, 1612, 1377, 1322, 1245, 1038, 994, 760; HRMS (EI) calcd for C<sub>13</sub>H<sub>13</sub>NO<sub>3</sub><sup>+</sup> ([M]<sup>+</sup>): 231.0890, found: 231.0898; HPLC analysis (Daicel Chiralcel OD-H column, λ = 254 nm, eluent: 80:20 hexane/EtOH, flow rate: 0.9 mL/min): *t*<sub>R</sub> = 27.41 min (major), 35.61 min (minor).

## 5. Transformation of Product 3ac to Spirolactone 7

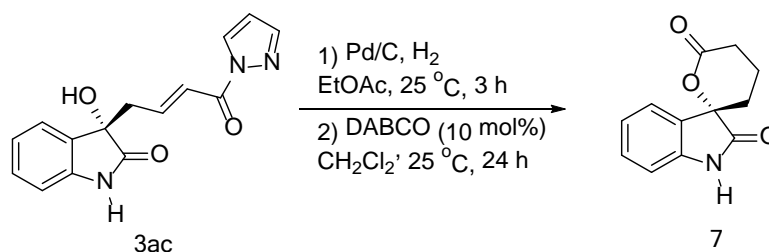

Compound **3ac** (95% ee, 0.5 mmol) was dissolved in 5 mL EtOAc, and 20 mol% Pd catalyst (10% w/w Pd/C, 106.4 mg, 0.10 mmol) was added at room temperature. The mixture was stirred under an atmosphere of hydrogen for 3 hours (monitored by TLC). After the reaction was completed, the resulting mixture was filtered through a celite pad, and washed with CH<sub>2</sub>Cl<sub>2</sub>. After removing the solvent under reduced pressure, the crude reduction product was used directly.

Then, DABCO (5.6 mg, 0.05 mmol) was added to a solution of the crude product in CH<sub>2</sub>Cl<sub>2</sub> (5.0 mL), and the mixture stirred at 25 °C for 24 hours (monitored by TLC). After removing the solvent under reduced pressure, the residue was purified by column chromatography (5:1 CH<sub>2</sub>Cl<sub>2</sub>/EtOAc) to get spiro lactone **7**.

### (S)-4',5'-dihydrospiro[indoline-3,2'-pyran]-2,6'(3'H)-dione (7)

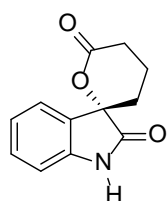

Colorless oil, 94.1 mg, 87% yield, 97% ee;  $[\alpha]_D^{25}$ -85.1 (*c* 1.34, CHCl<sub>3</sub>); <sup>1</sup>H NMR (400 MHz, CDCl<sub>3</sub>): δ 8.82 (s, H), 7.32 (d, *J* = 7.2 Hz, 1H), 7.30-7.26 (m, 1H), 7.09-7.05 (m, 1H), 6.92-6.89 (m, 1H), 2.94-2.87 (m, 1H), 2.73-2.65 (m, 1H), 2.63-2.52 (m, 1H), 2.20-2.05 (m, 2H), 2.01-1.92 (m, 1H); <sup>13</sup>C{<sup>1</sup>H} NMR (100 MHz, CDCl<sub>3</sub>): δ 176.1, 170.2, 140.1, 130.6, 128.5, 124.2, 123.3, 110.7, 82.1, 29.6, 29.4, 15.5; HPLC analysis (Daicel Chiralpak AS-

H column,  $\lambda = 254$  nm, eluent: 70:30 hexane/2-propanol, flow rate: 0.9 mL/min):  $t_R = 25.92$  min (major), 23.85 min (minor).

## 6. References

1. (a) Okino, T.; Hoashi, Y.; Furukawa, T.; Xu, X.; Takemoto, Y. Enantio- and Diastereoselective Michael Reaction of 1,3-Dicarbonyl Compounds to Nitroolefins Catalyzed by a Bifunctional Thiourea. *J. Am. Chem. Soc.* **2005**, *127*, 119-125. (b) Vakulya, B.; Varga, S.; Csámpai, A.; Soós, T. Highly Enantioselective Conjugate Addition of Nitromethane to Chalcones Using Bifunctional Cinchona Organocatalysts. *Org. Lett.* **2005**, *7*, 1967-1969. (c) McCooey, S. H.; Connon, S. J. Readily Accessible 9-Epi-amino Cinchona Alkaloid Derivatives Promote Efficient, Highly Enantioselective Additions of Aldehydes and Ketones to Nitroolefins. *Org. Lett.* **2007**, *9*, 599-602. (d) Yang, W.; Du, D.-M. Highly Enantioselective Michael Addition of Nitroalkanes to Chalcones Using Chiral Squaramides as Hydrogen Bonding Organocatalysts. *Org. Lett.* **2010**, *12*, 5450-5453.
2. (a) Zhang, H.-J.; Shi, C.-Y.; Zhong, F.; Yin, L. Direct Asymmetric Vinylogous and Bisvinylogous Mannich-Type Reaction Catalyzed by a Copper(I) Complex. *J. Am. Chem. Soc.* **2017**, *139*, 2196-2199. (b) Sun, X.; Zhou, L.; Wang, C.-J.; Zhang, X. Rh-Catalyzed Highly Enantioselective Synthesis of 3-Arylbutanoic Acids. *Angew. Chem. Int. Ed.* **2007**, *46*, 2623-2626.
3. Yan, W.-J.; Wang, D.; Feng, J.-C.; Li, P.; Zhao, D.-P.; Wang, R. Synthesis of N-Alkoxy carbonyl Ketimines Derived from Isatins and Their Application in Enantioselective Synthesis of 3-Aminooxindoles. *Org. Lett.* **2012**, *14*, 2512-2515.

## 7. Copies of NMR Spectra of the Products 3-7

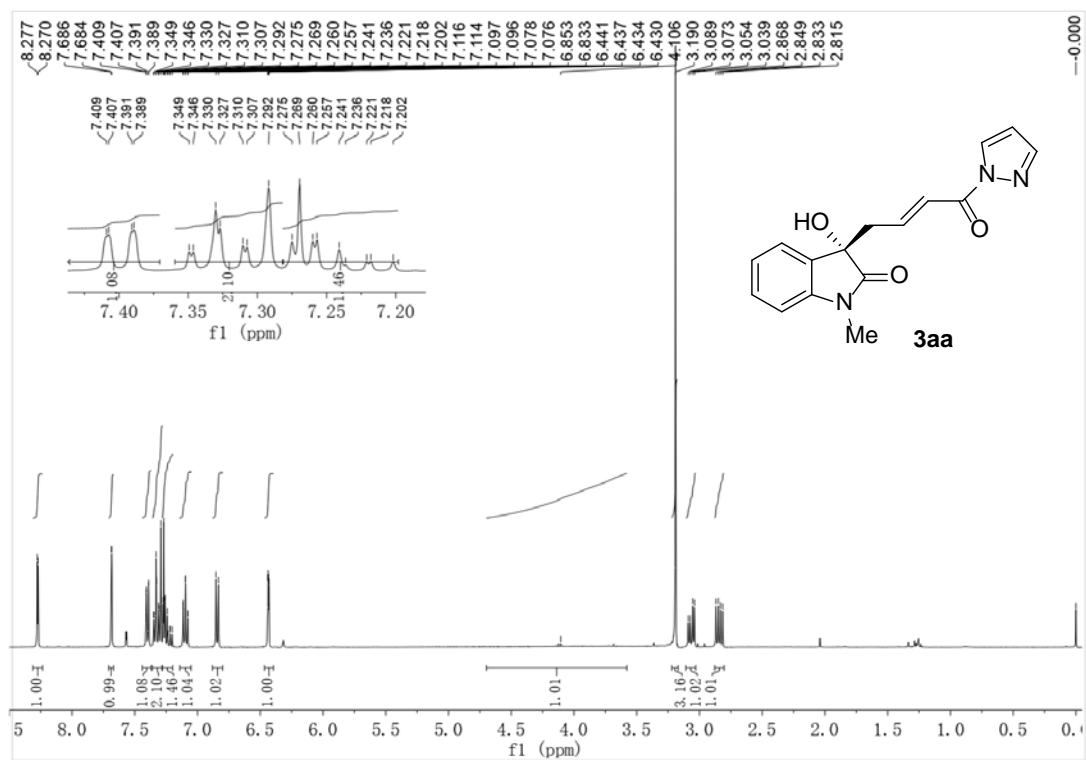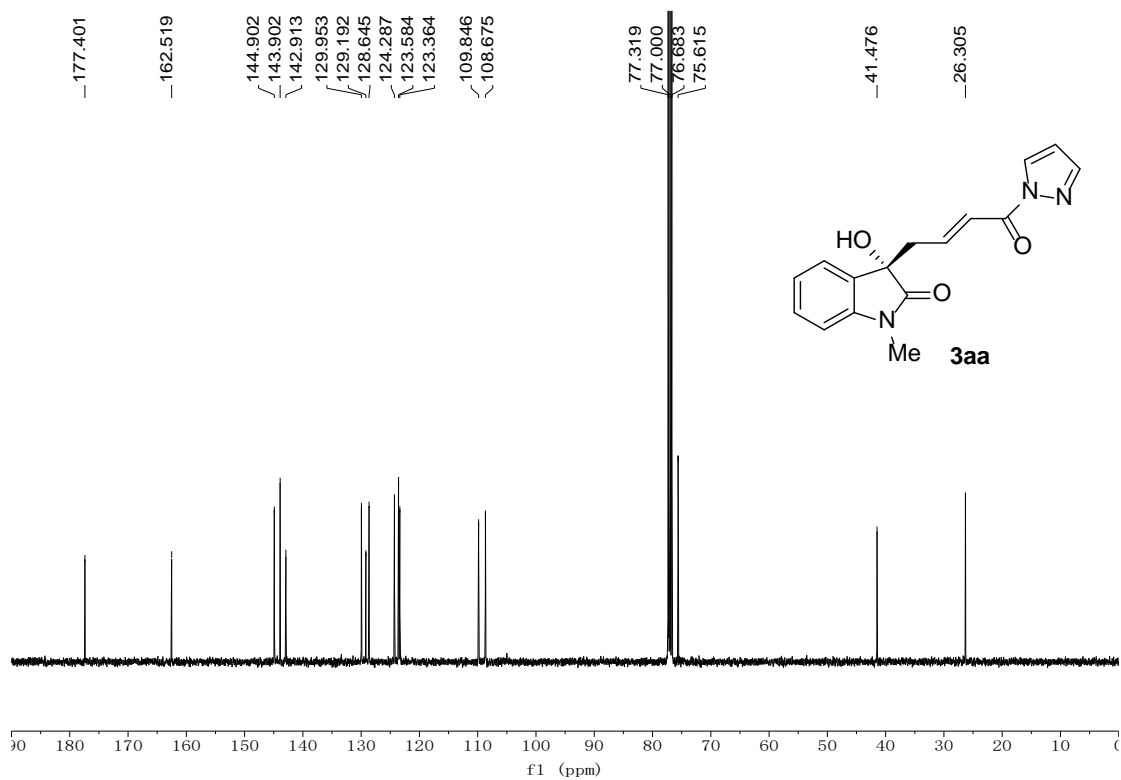

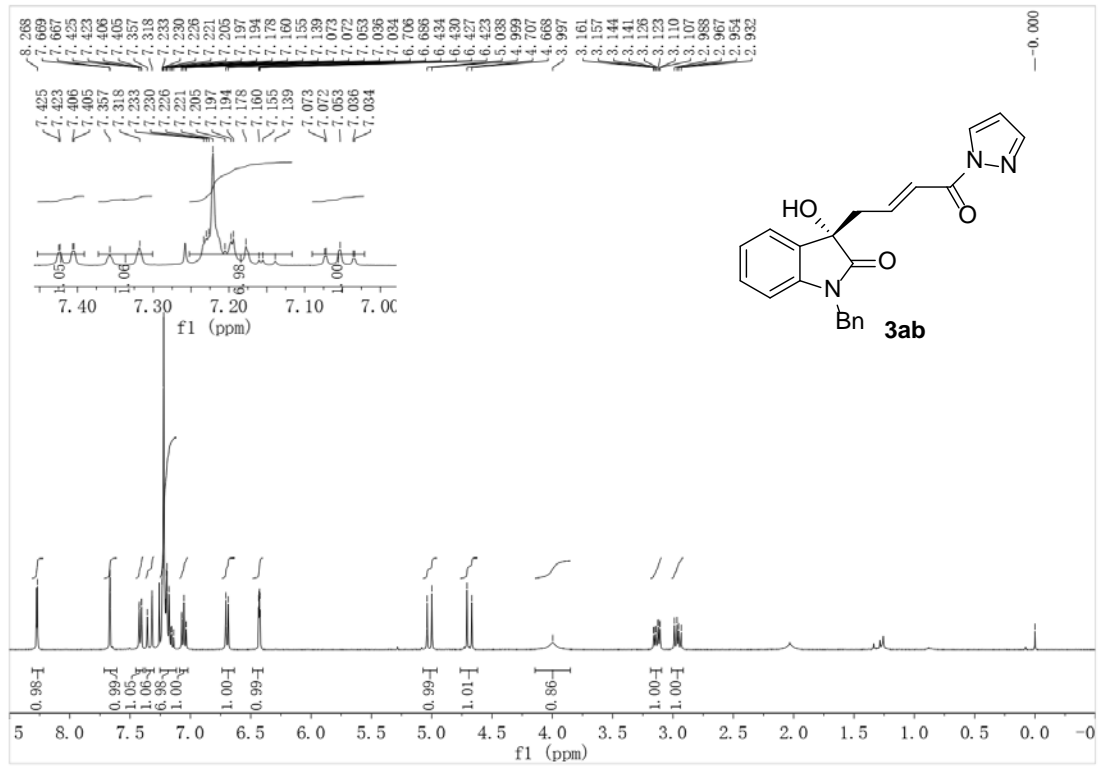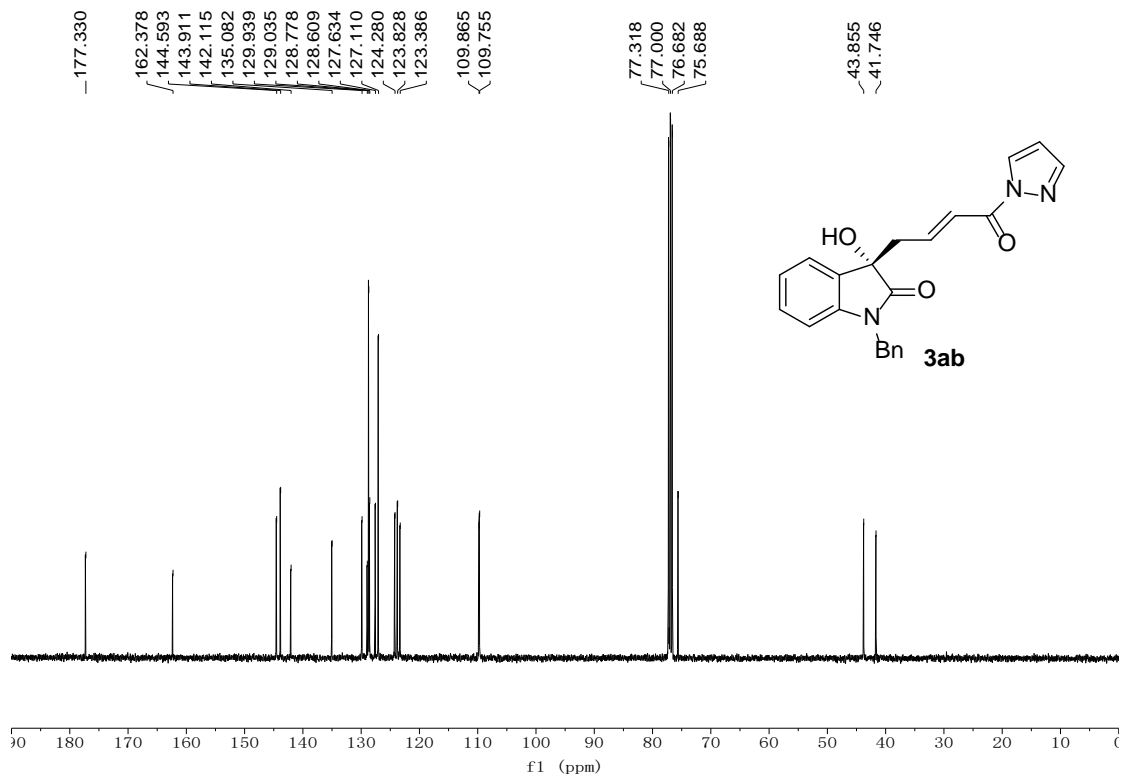

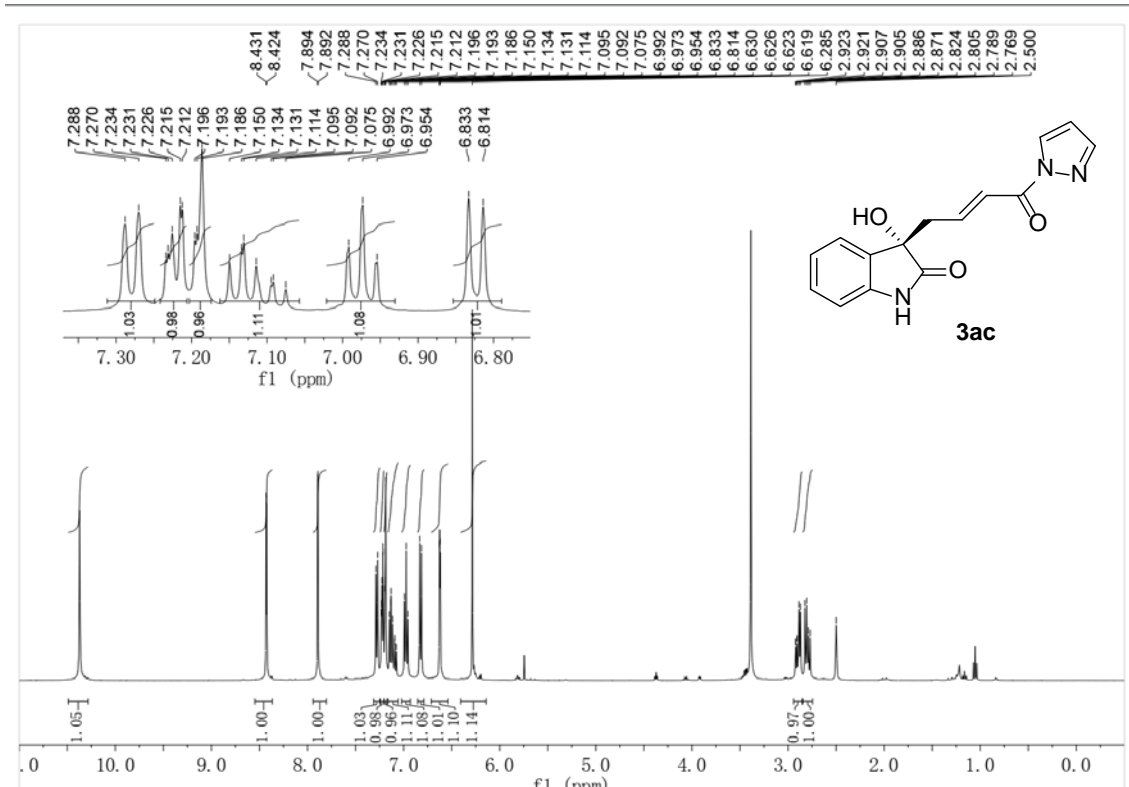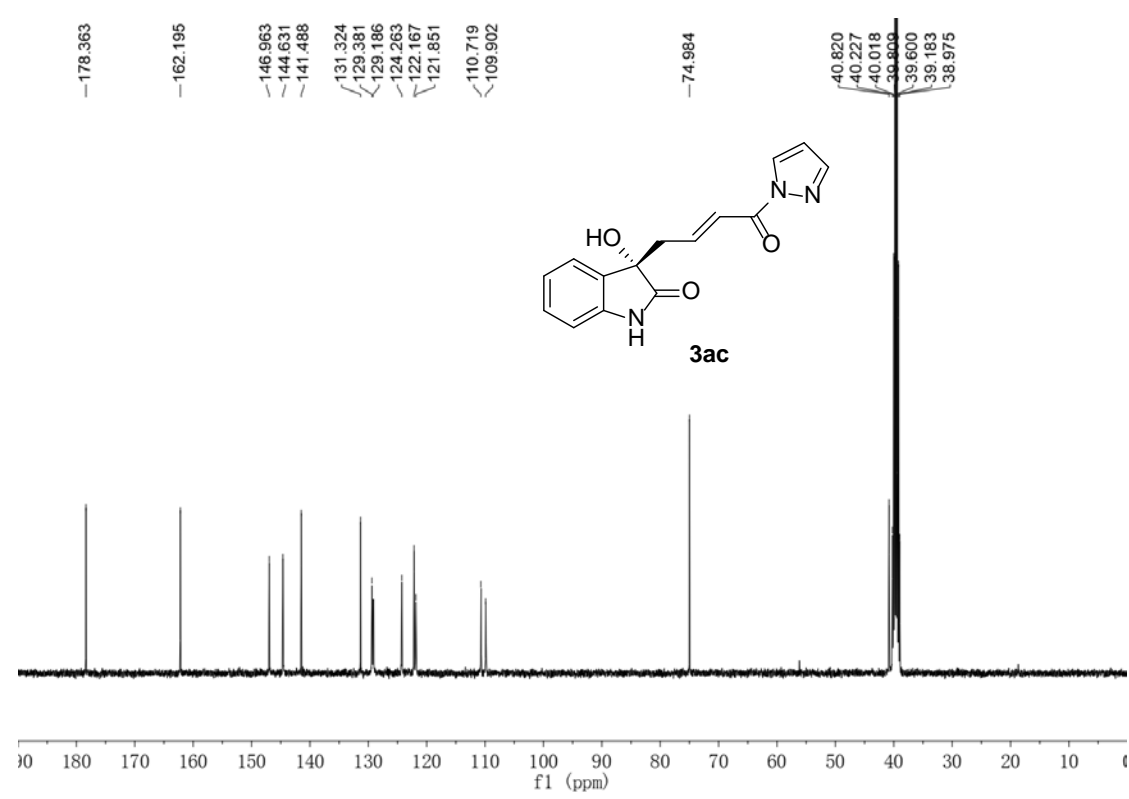

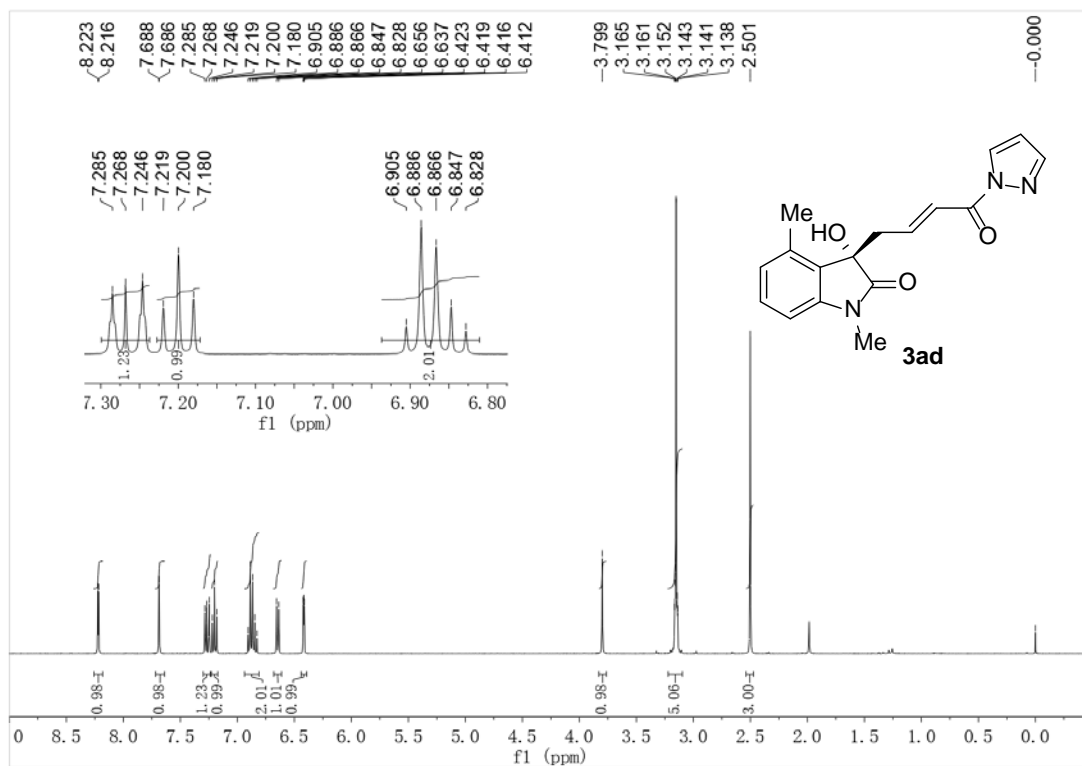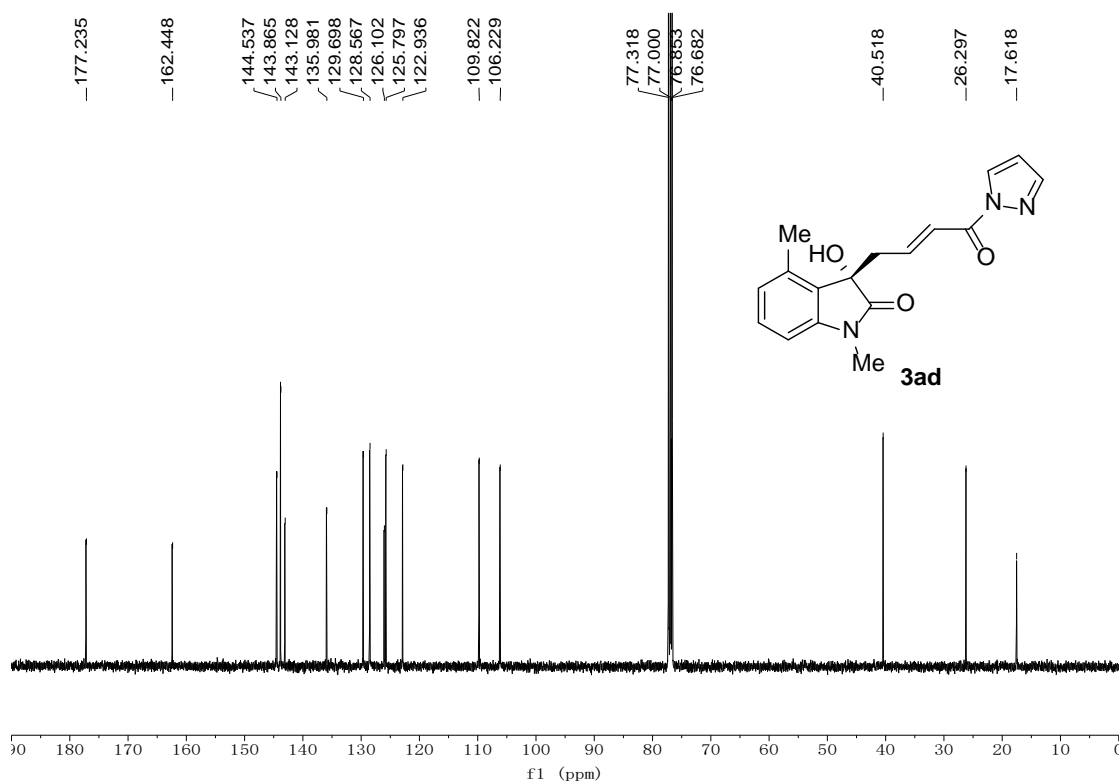

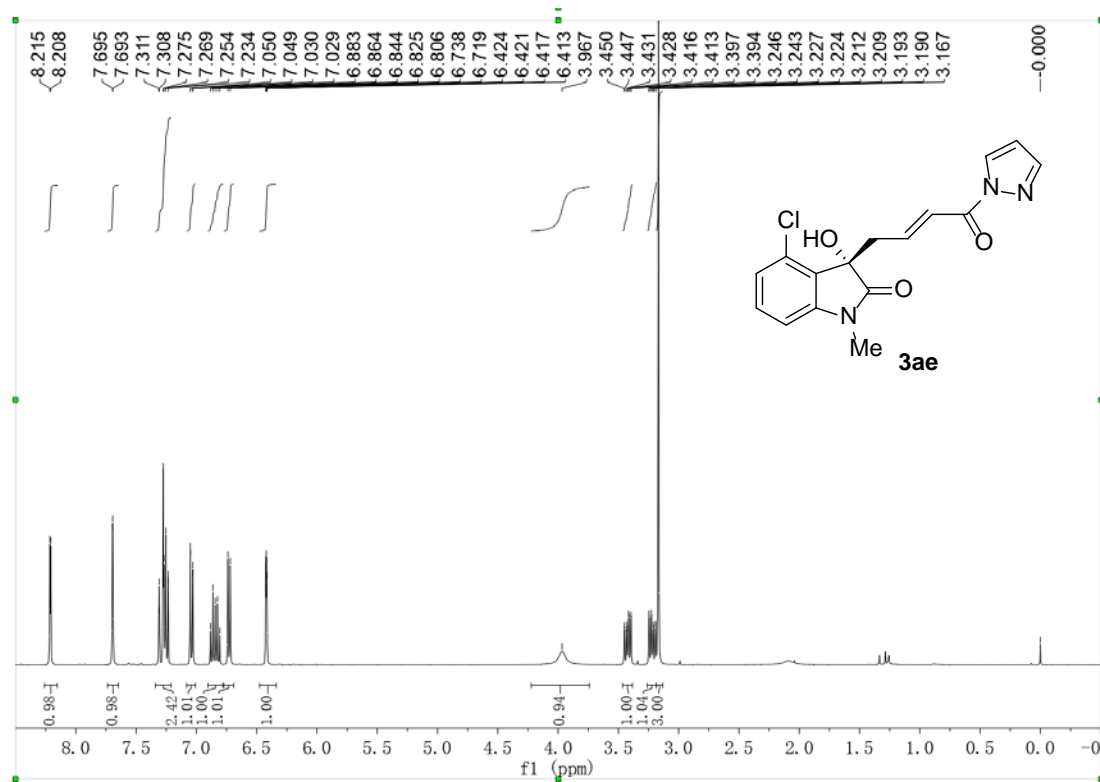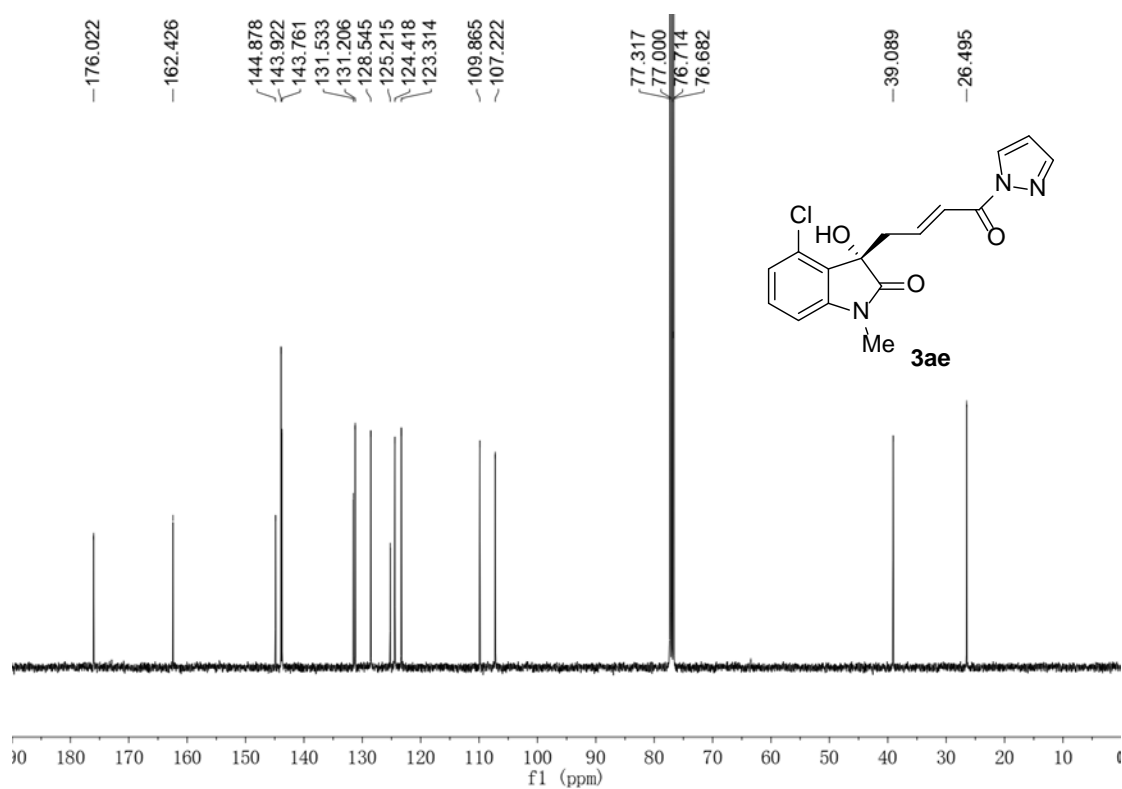

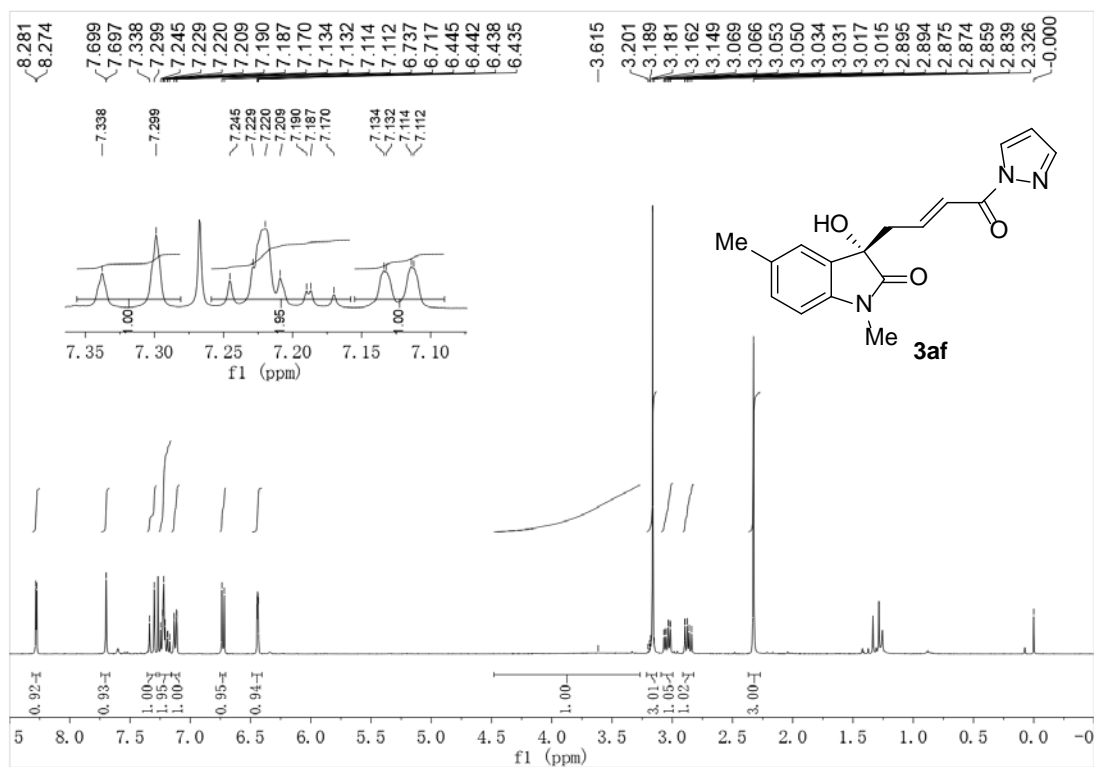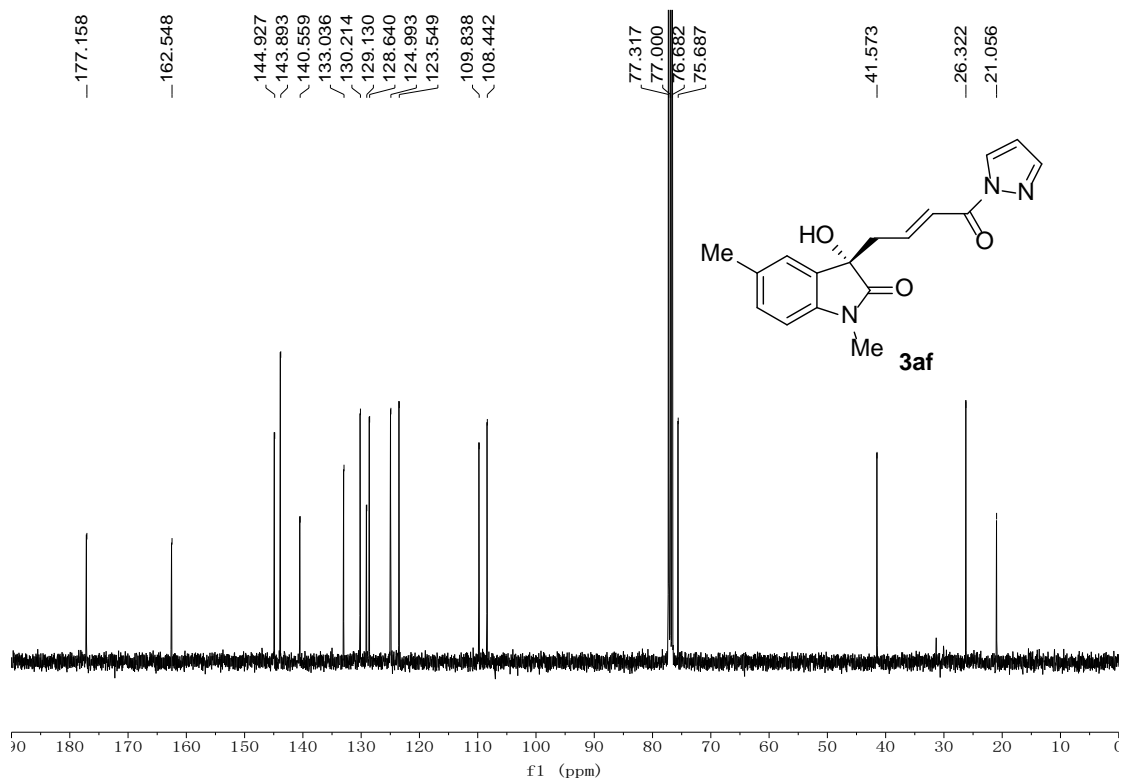



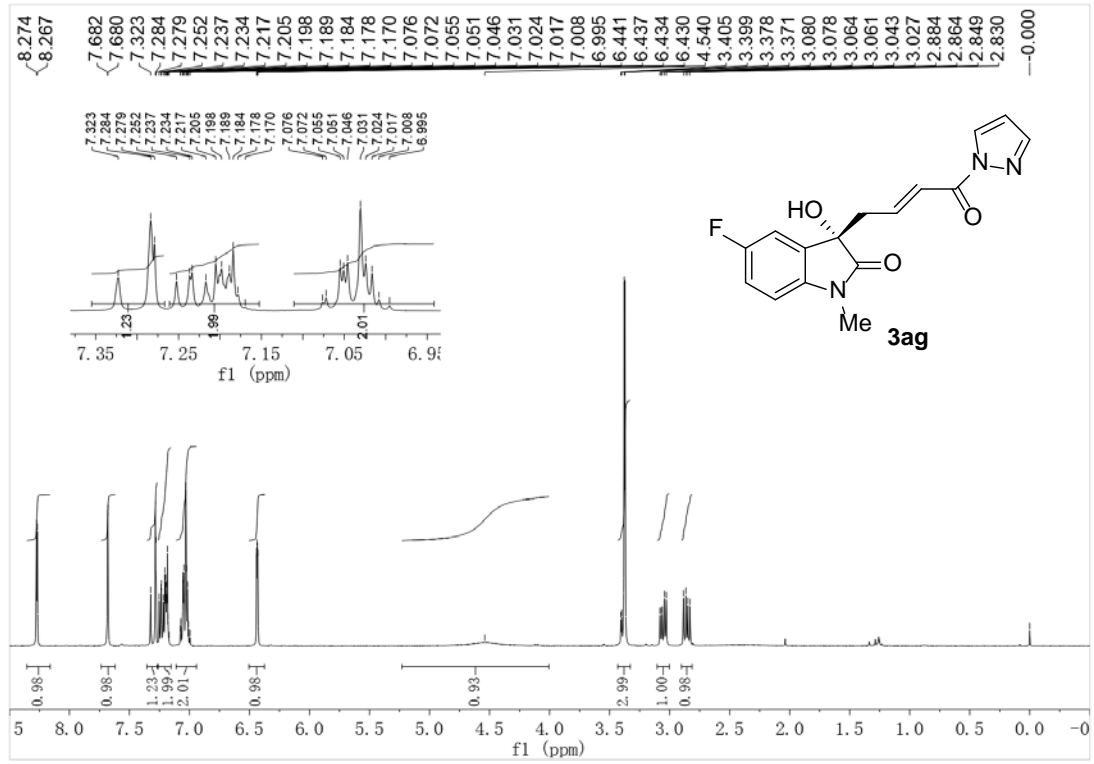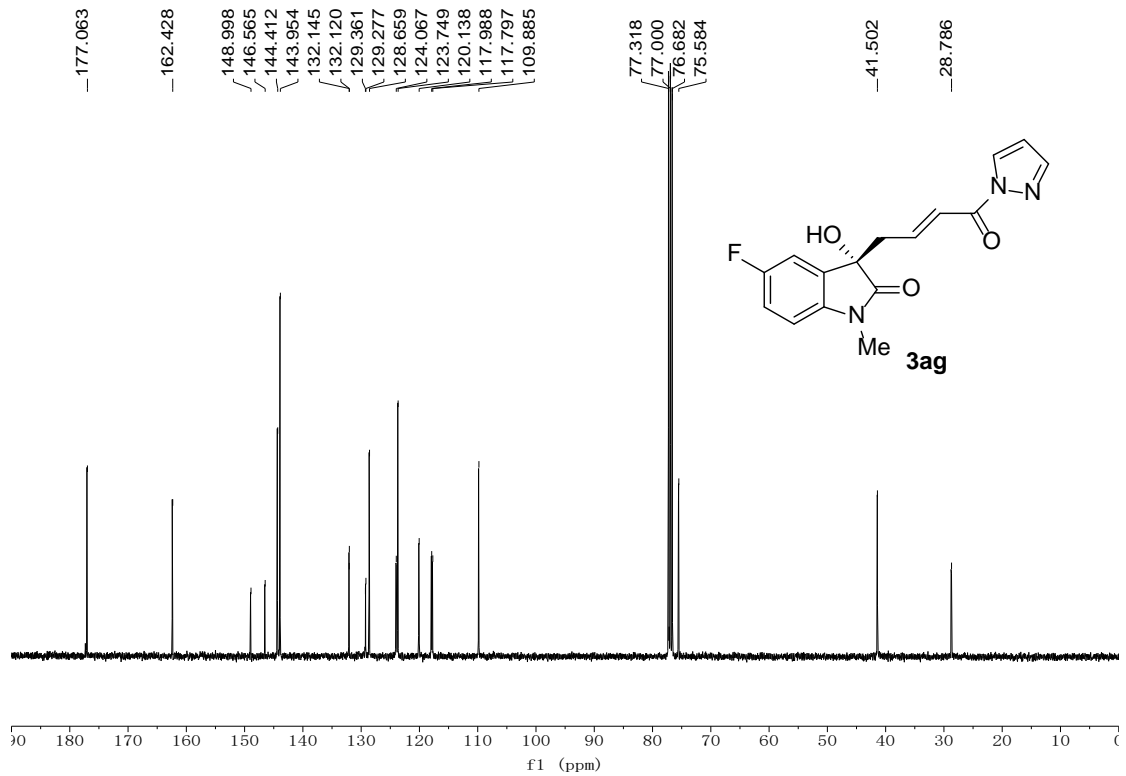

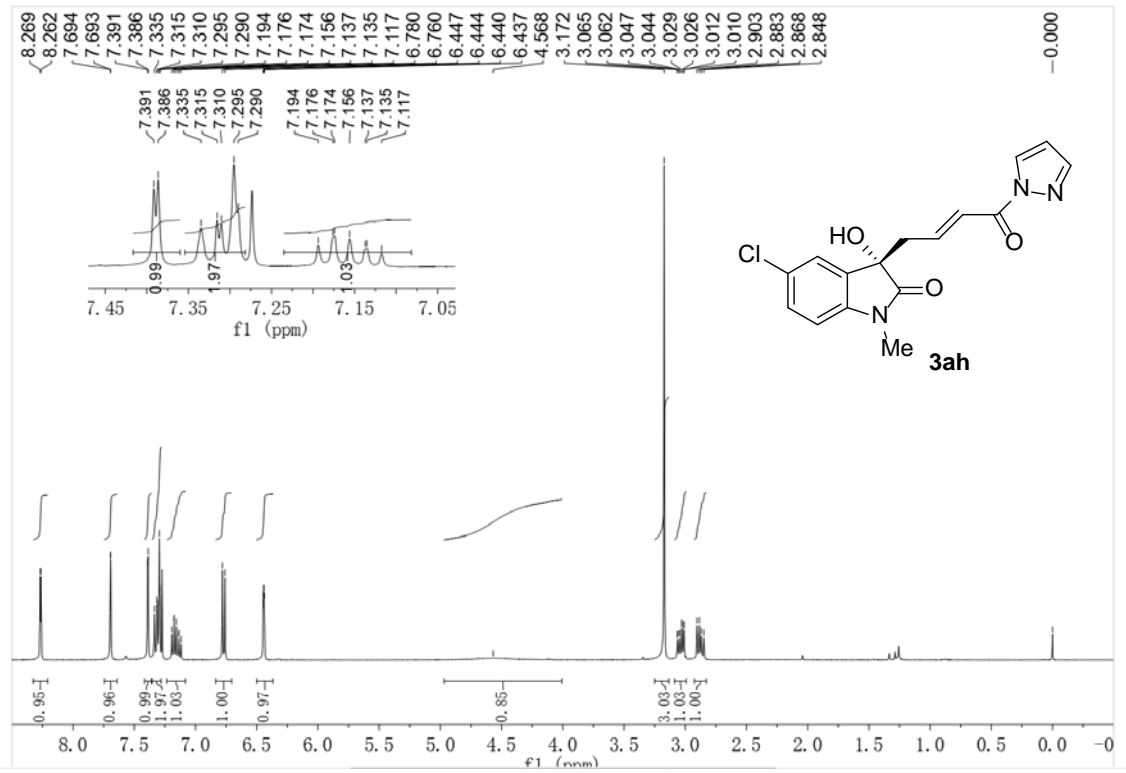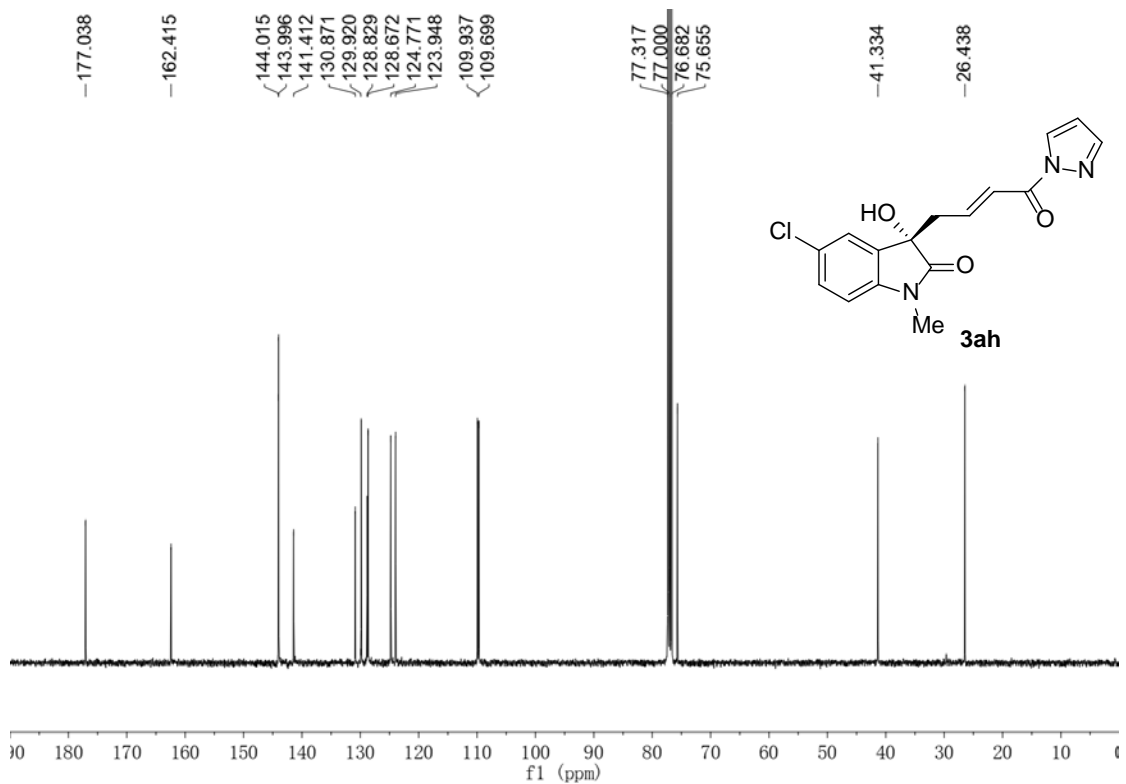

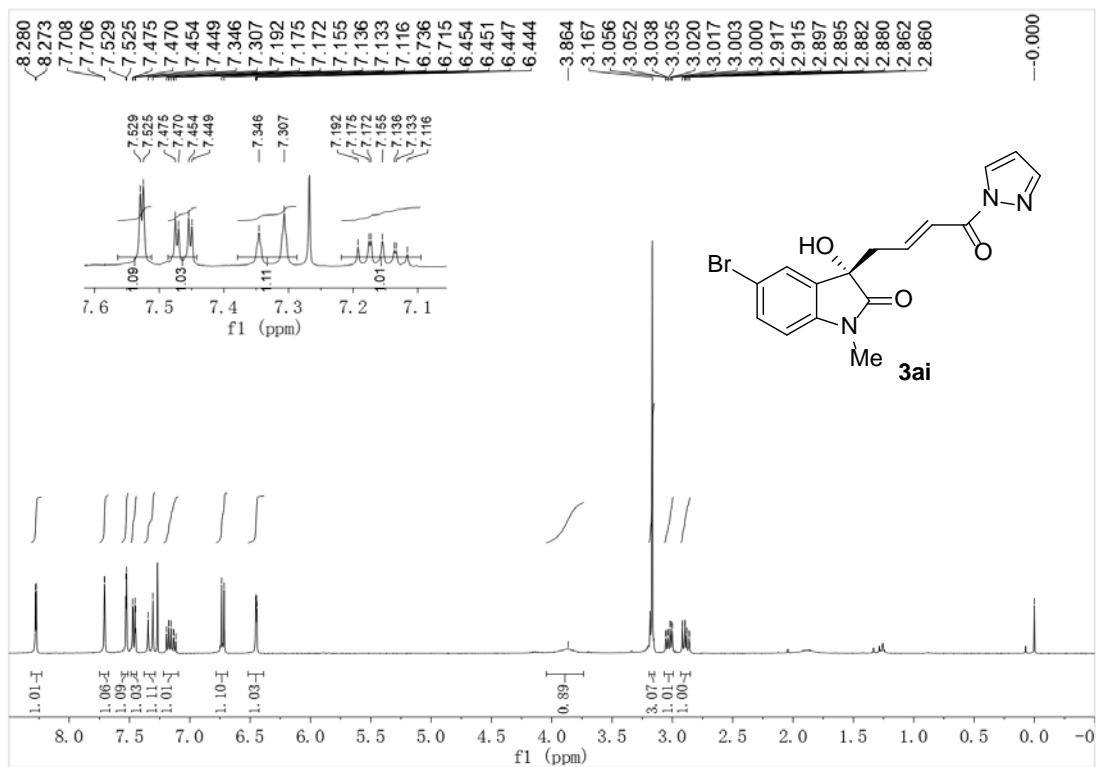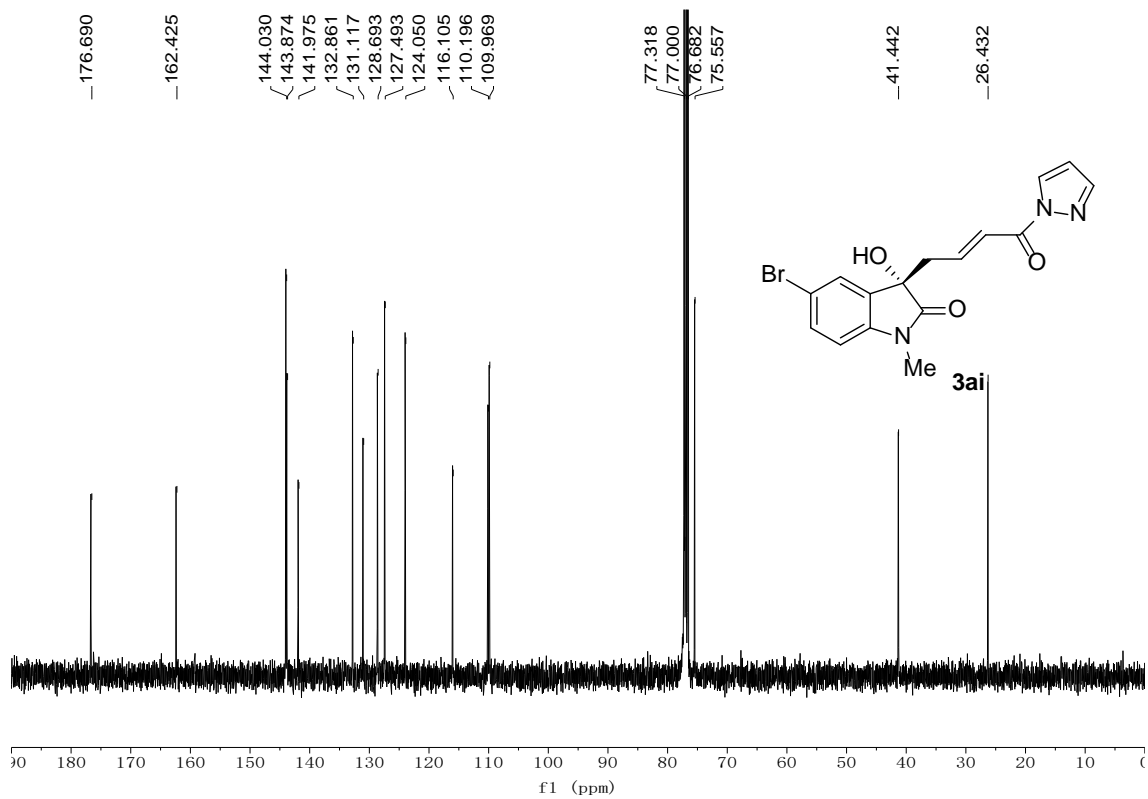

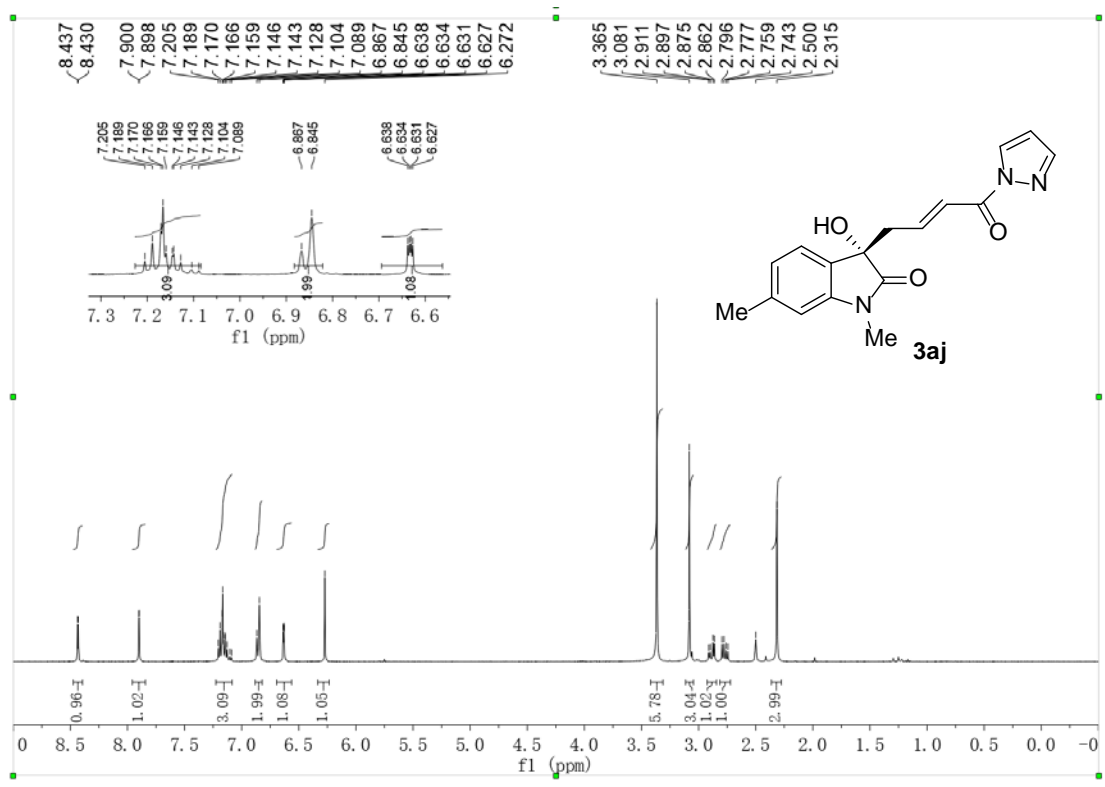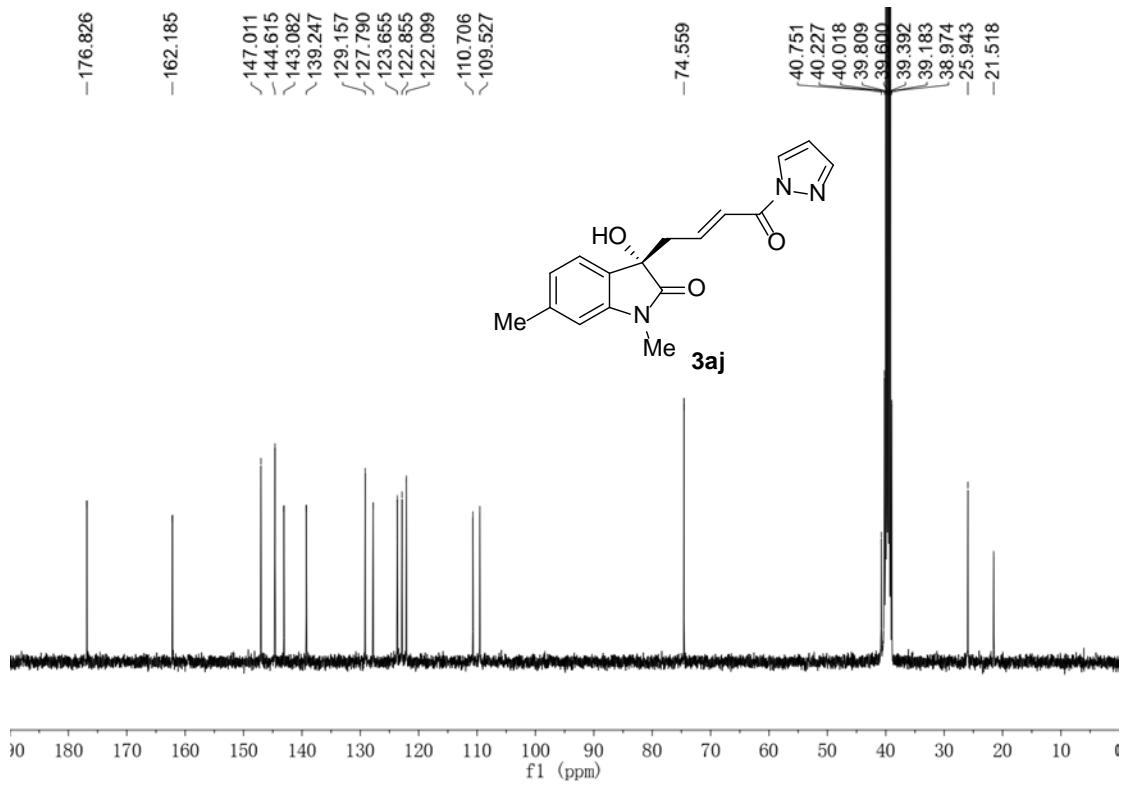

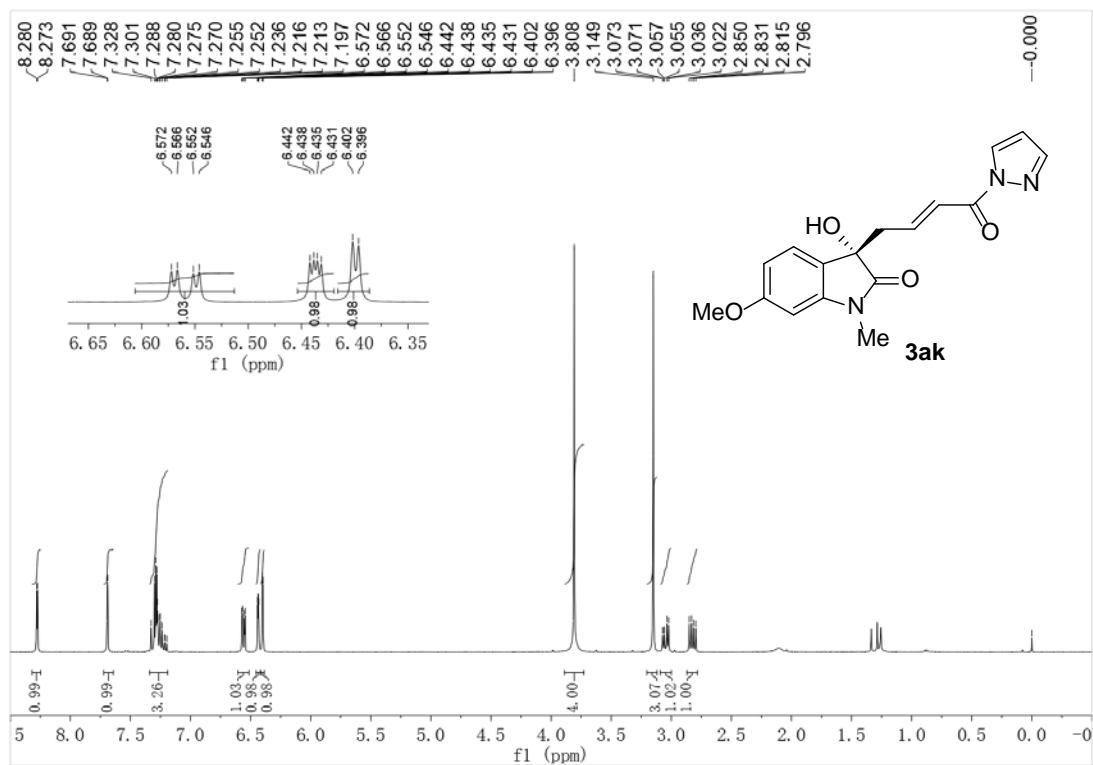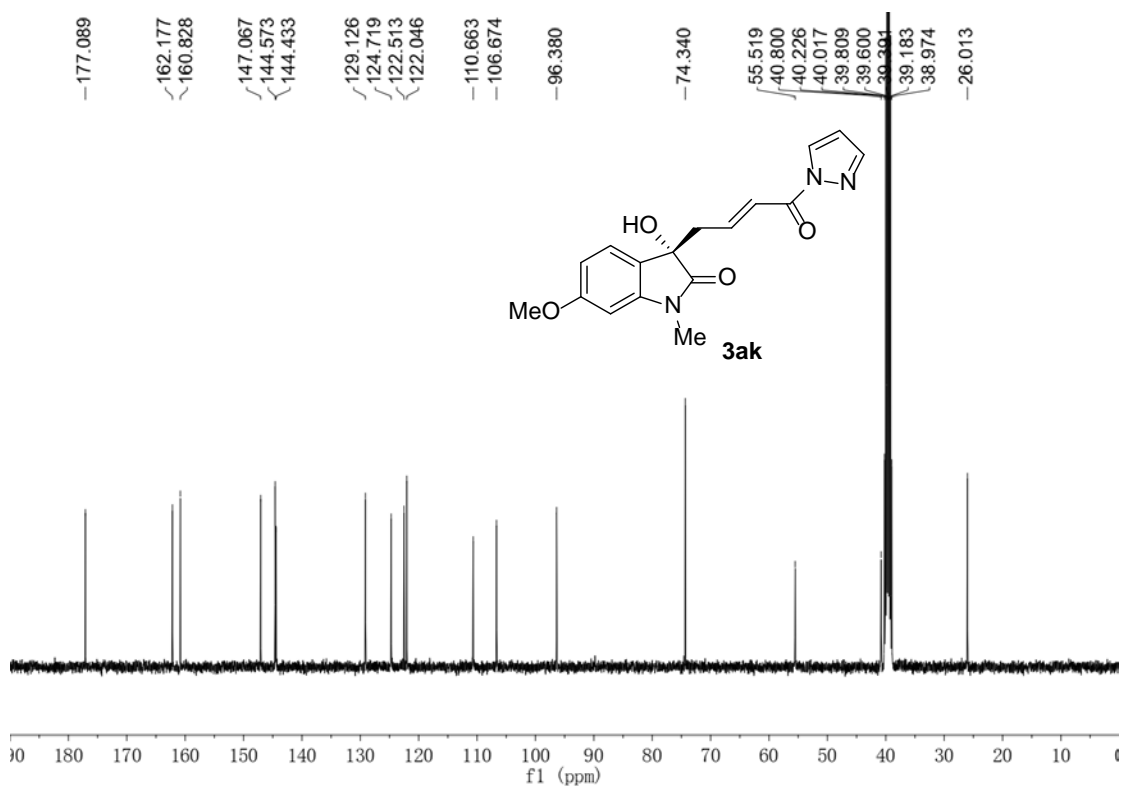

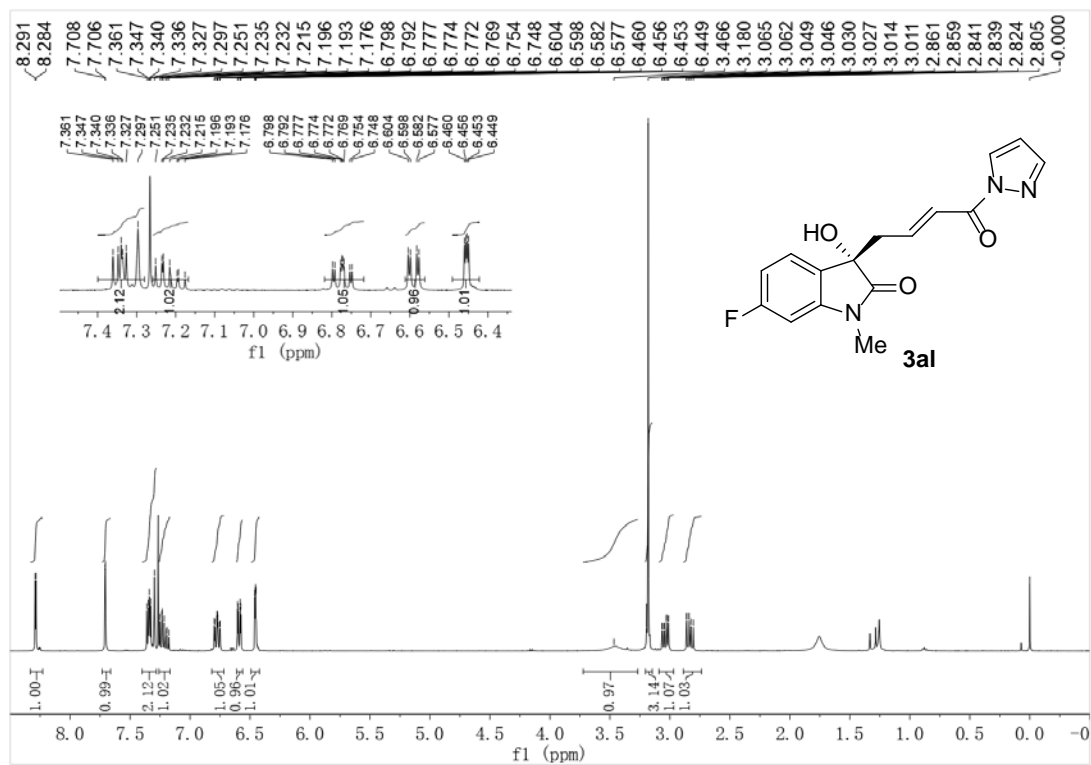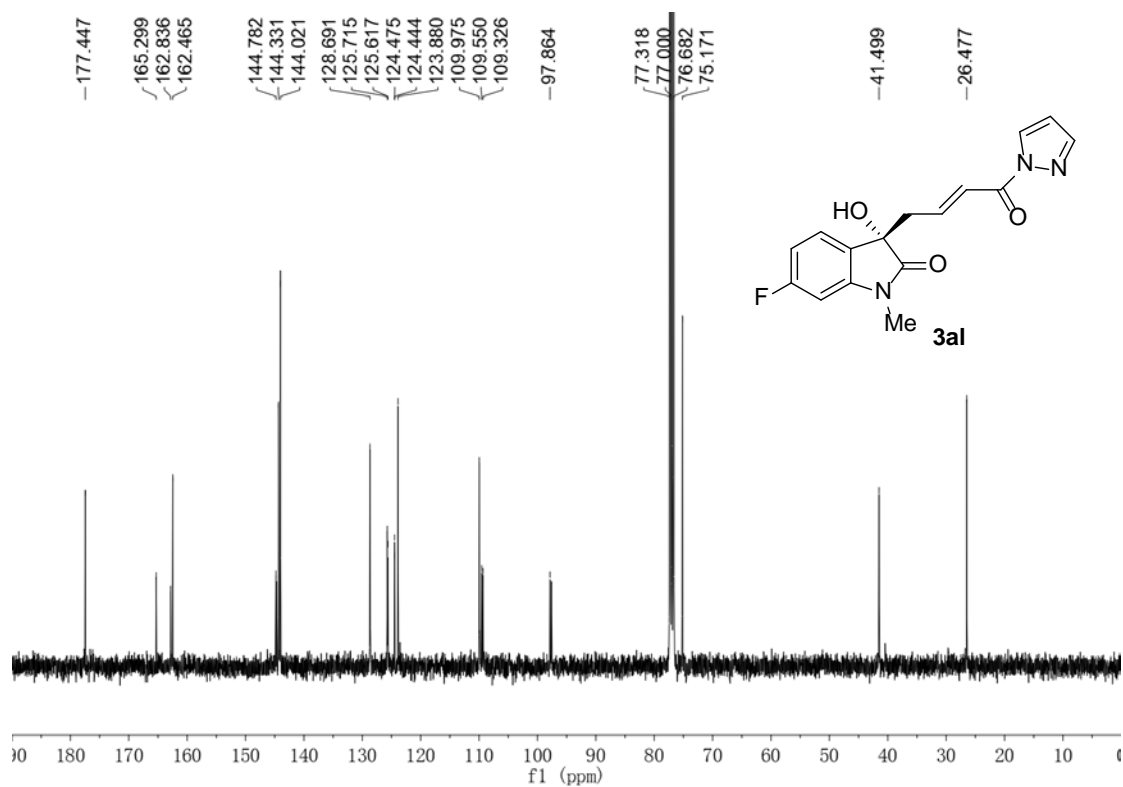

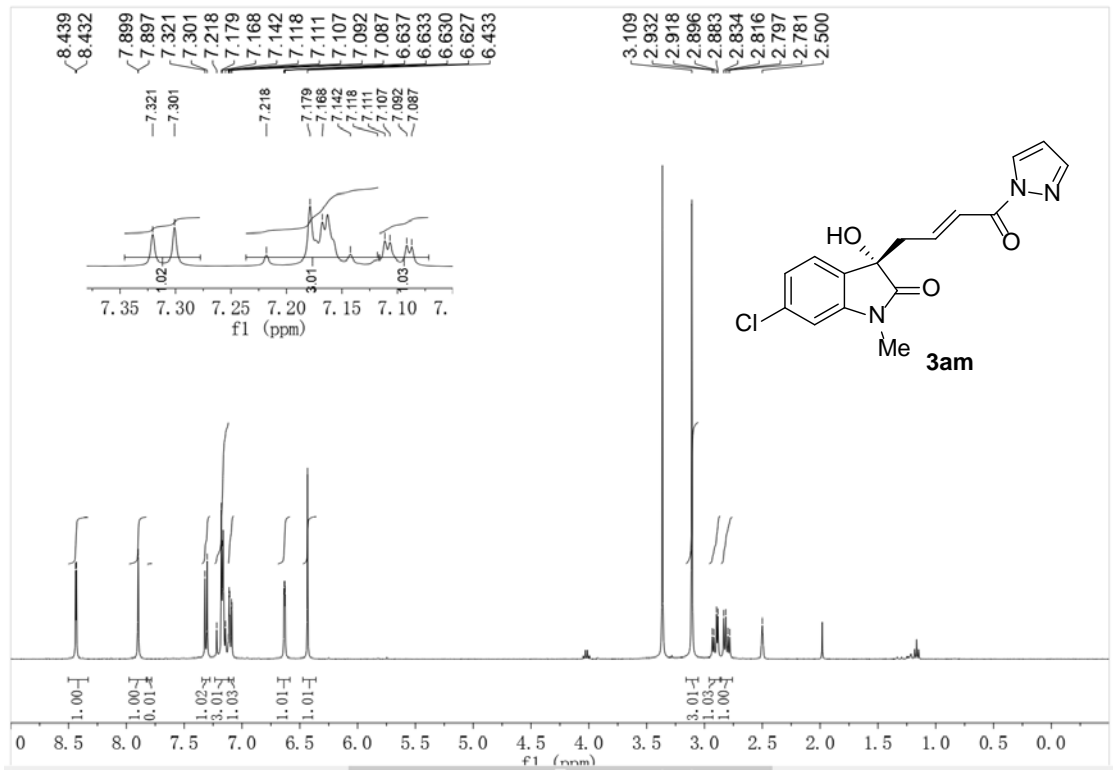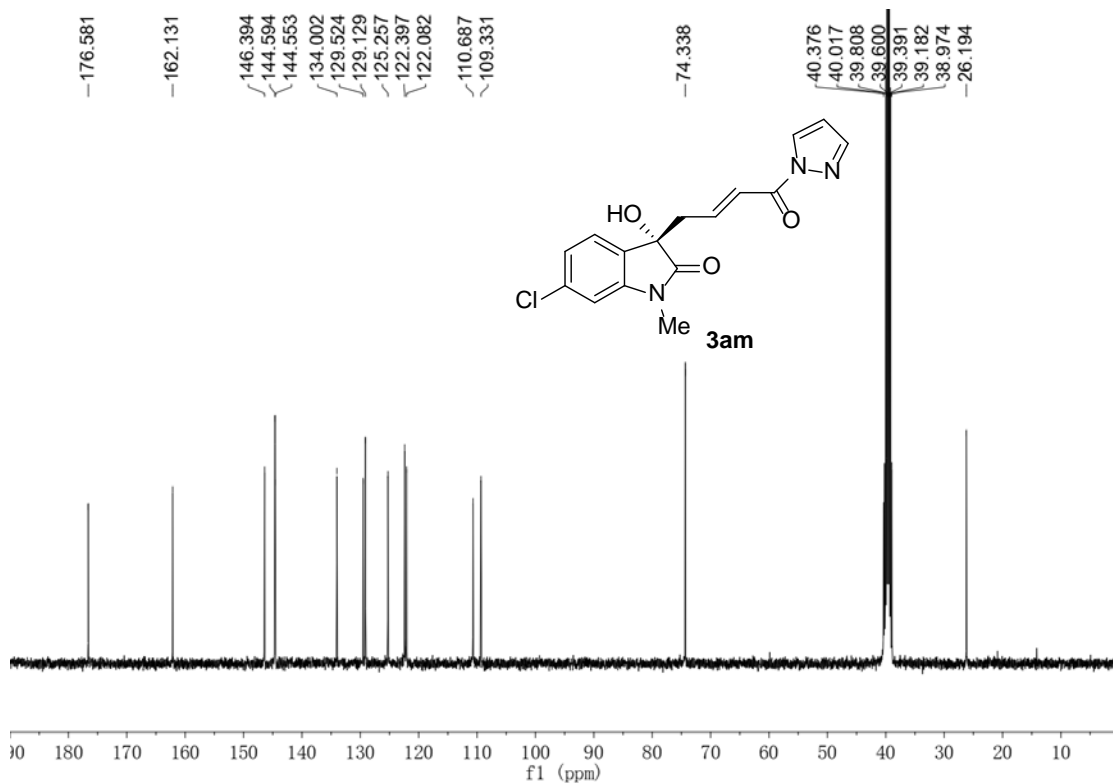

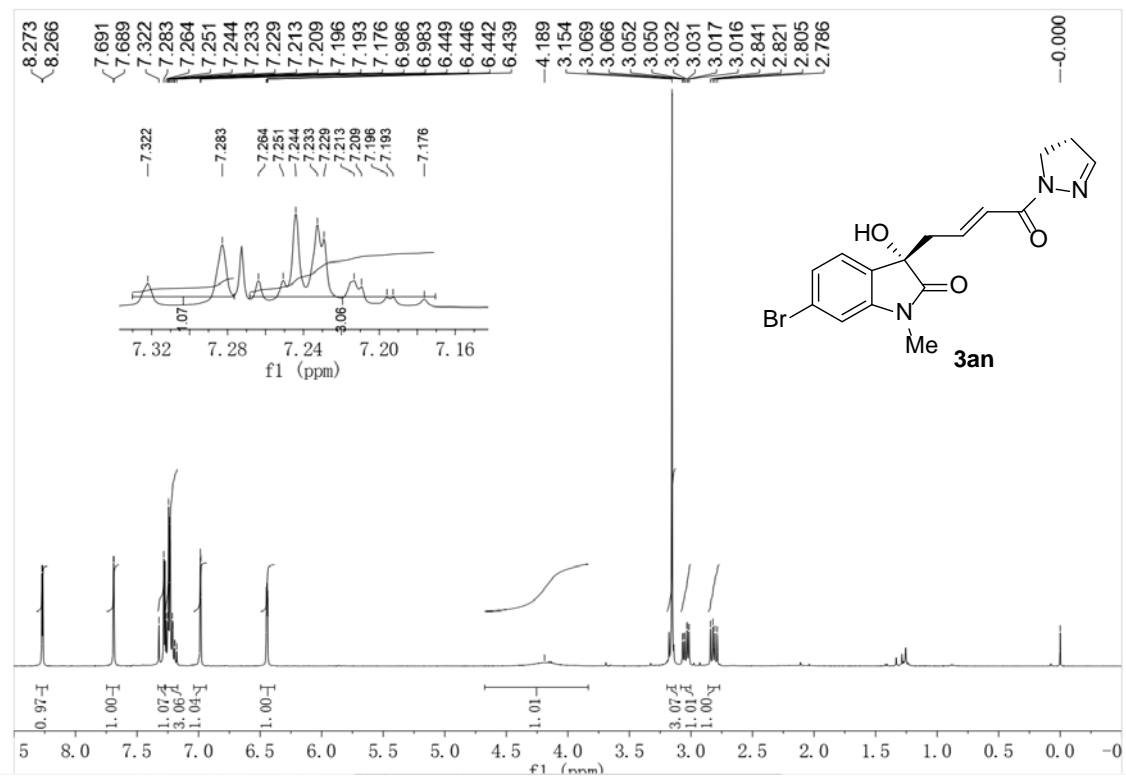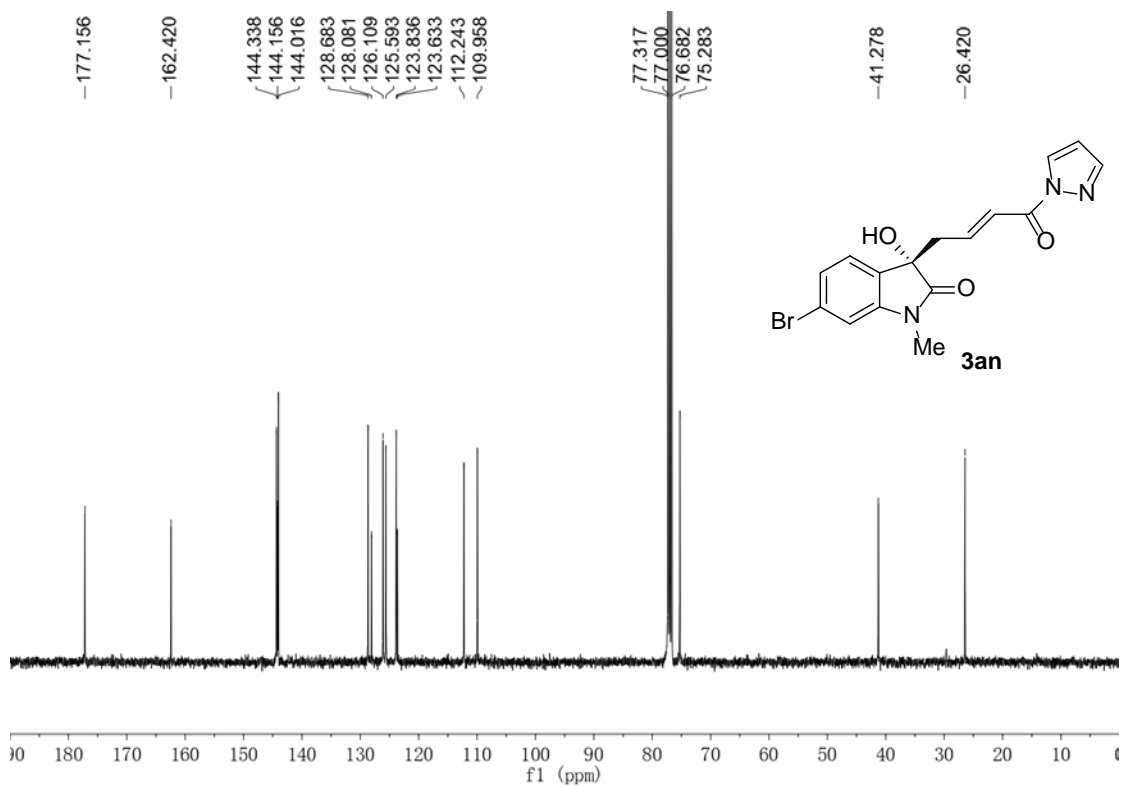



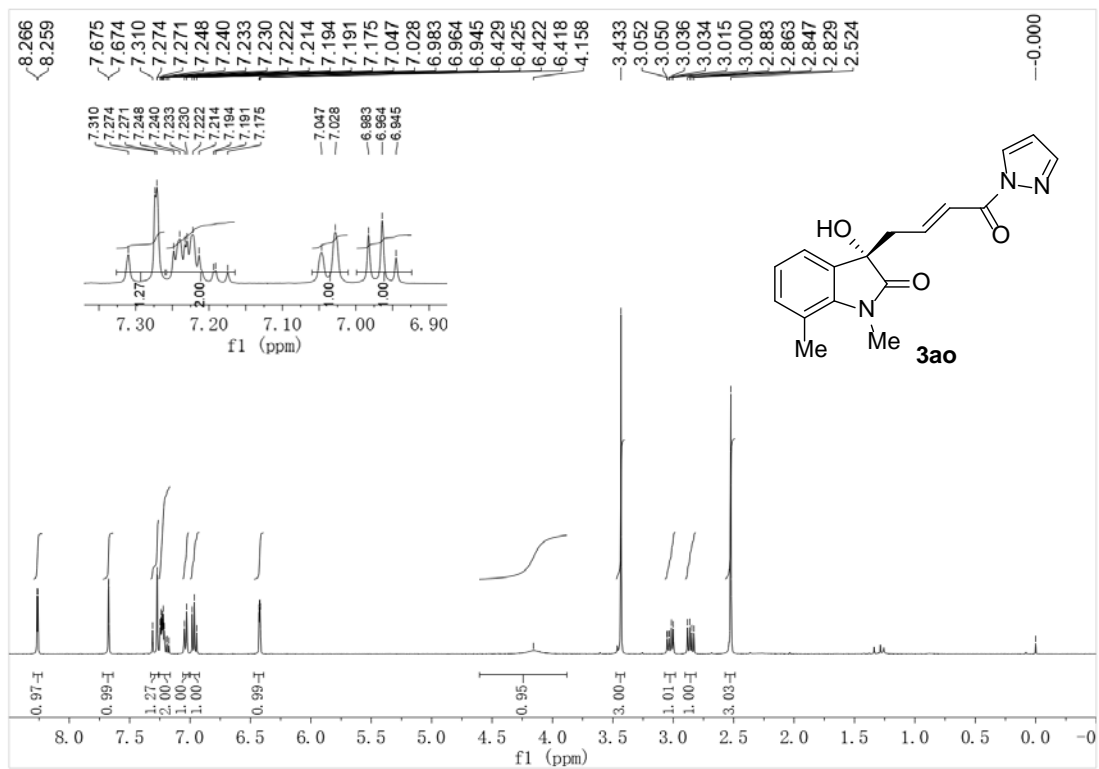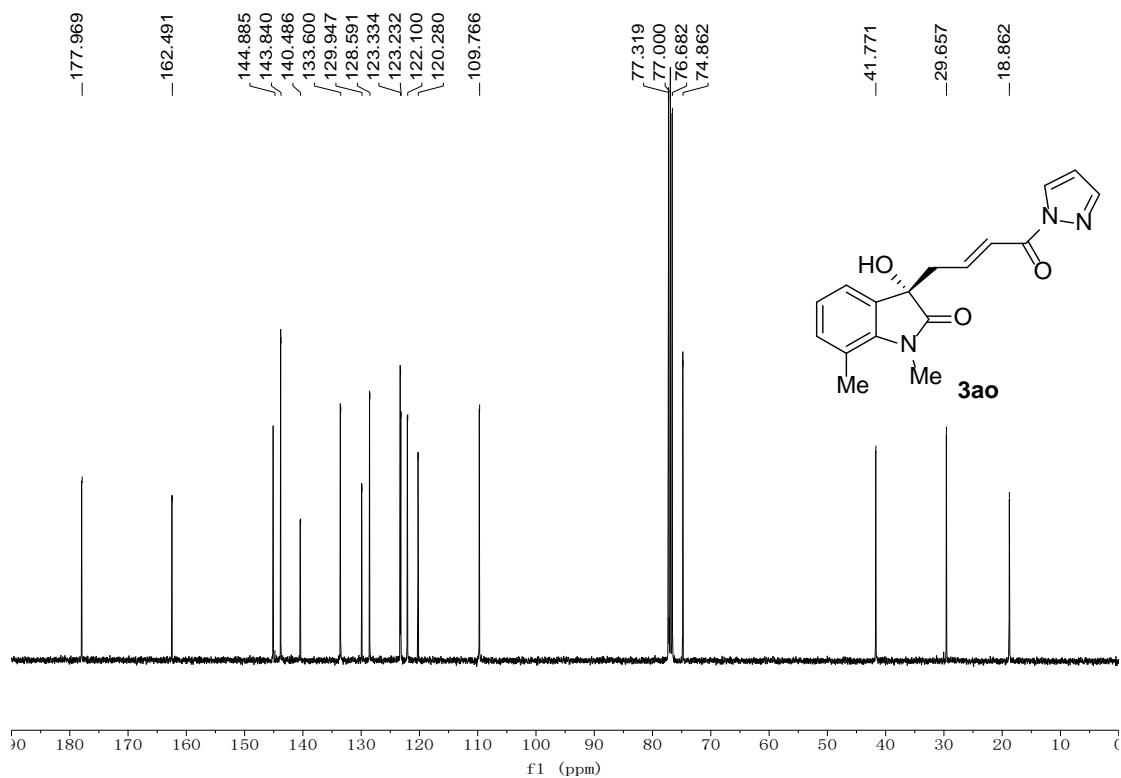

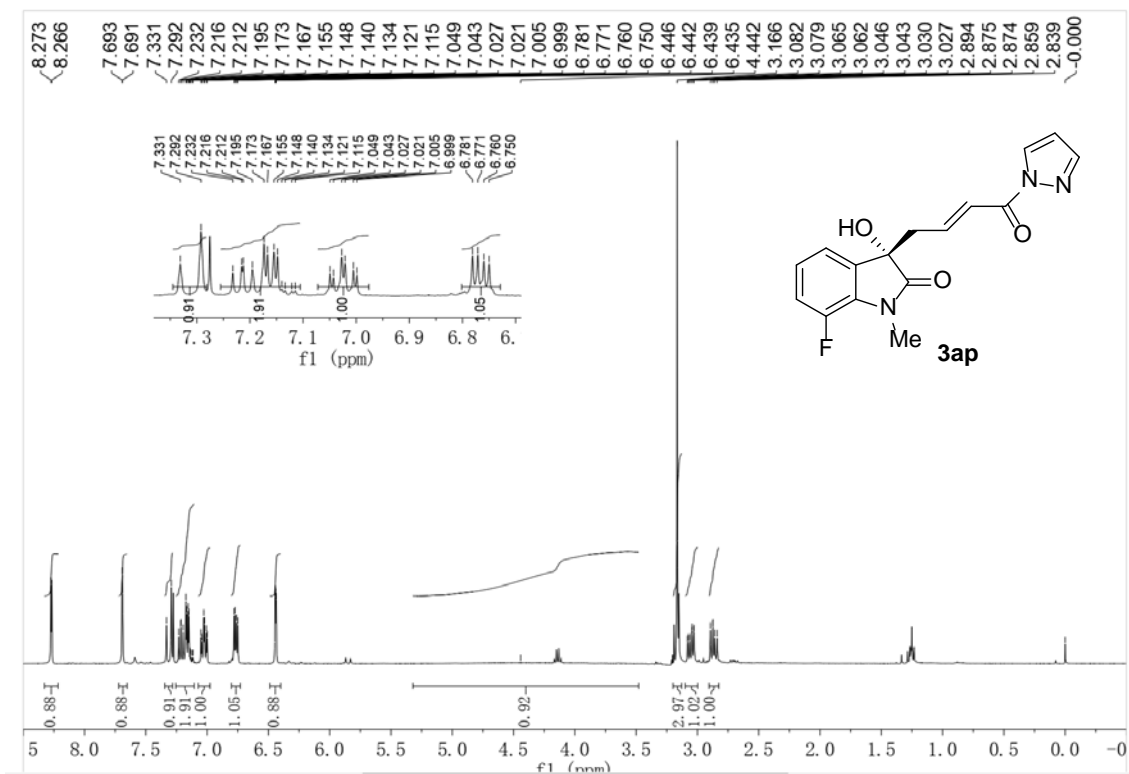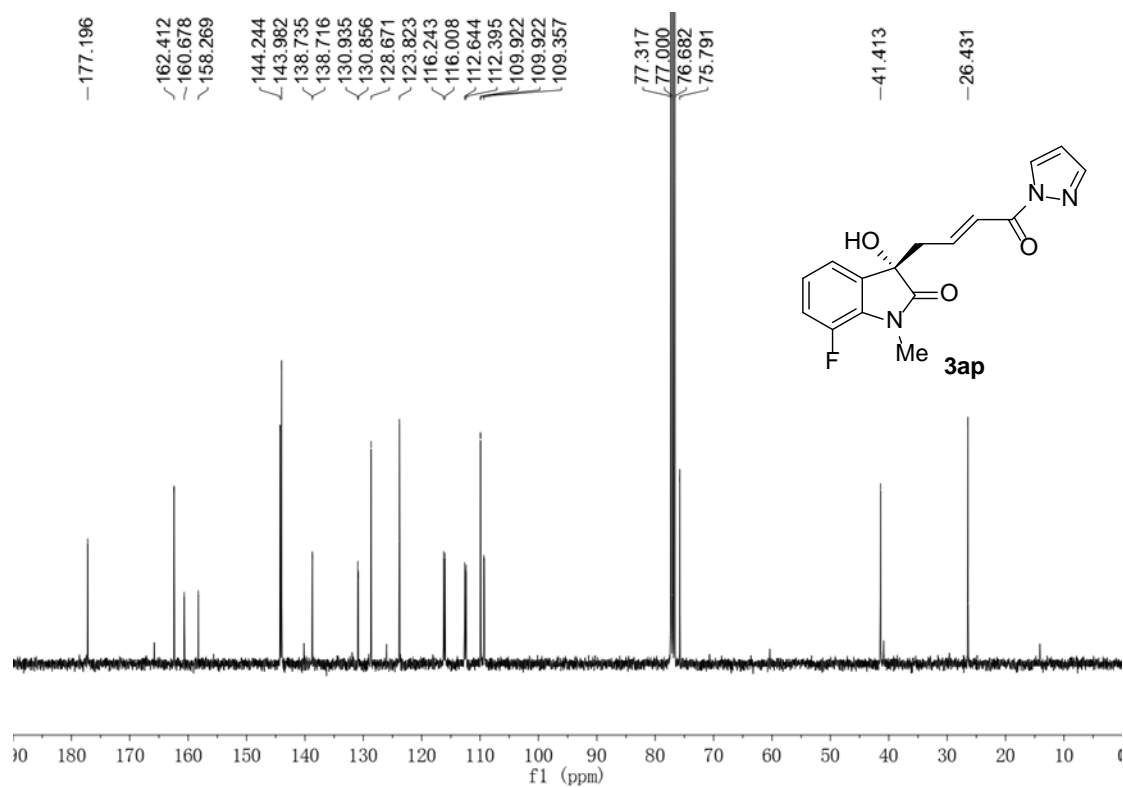

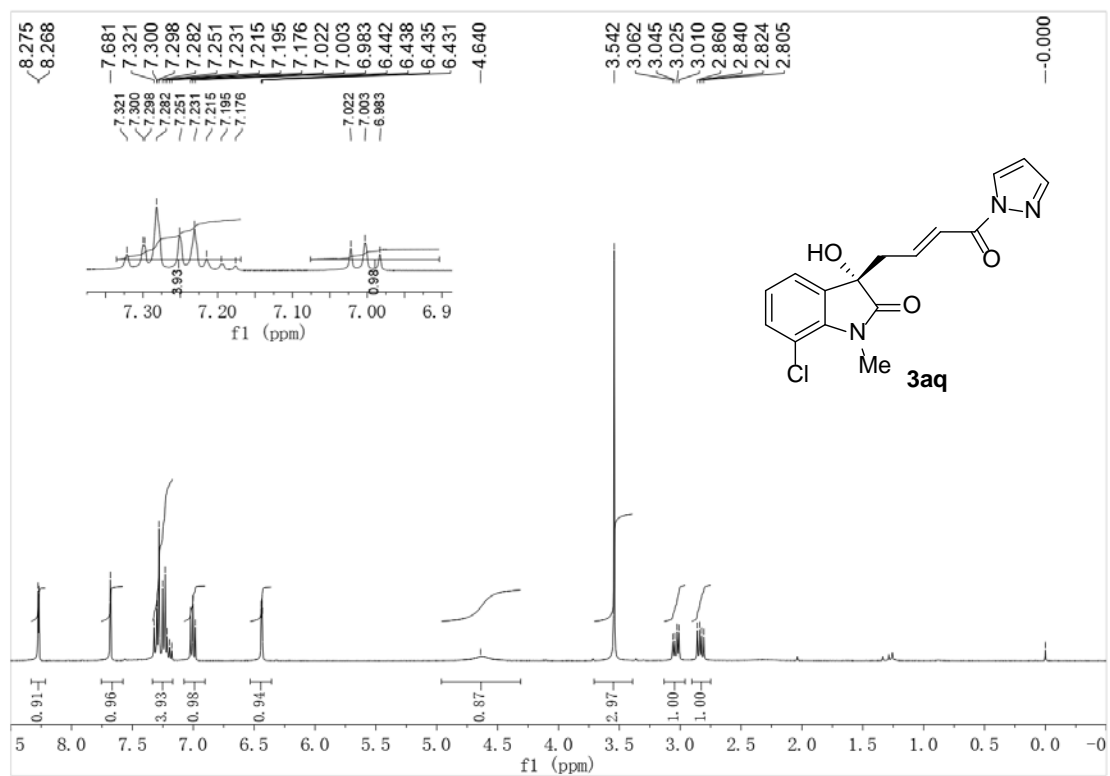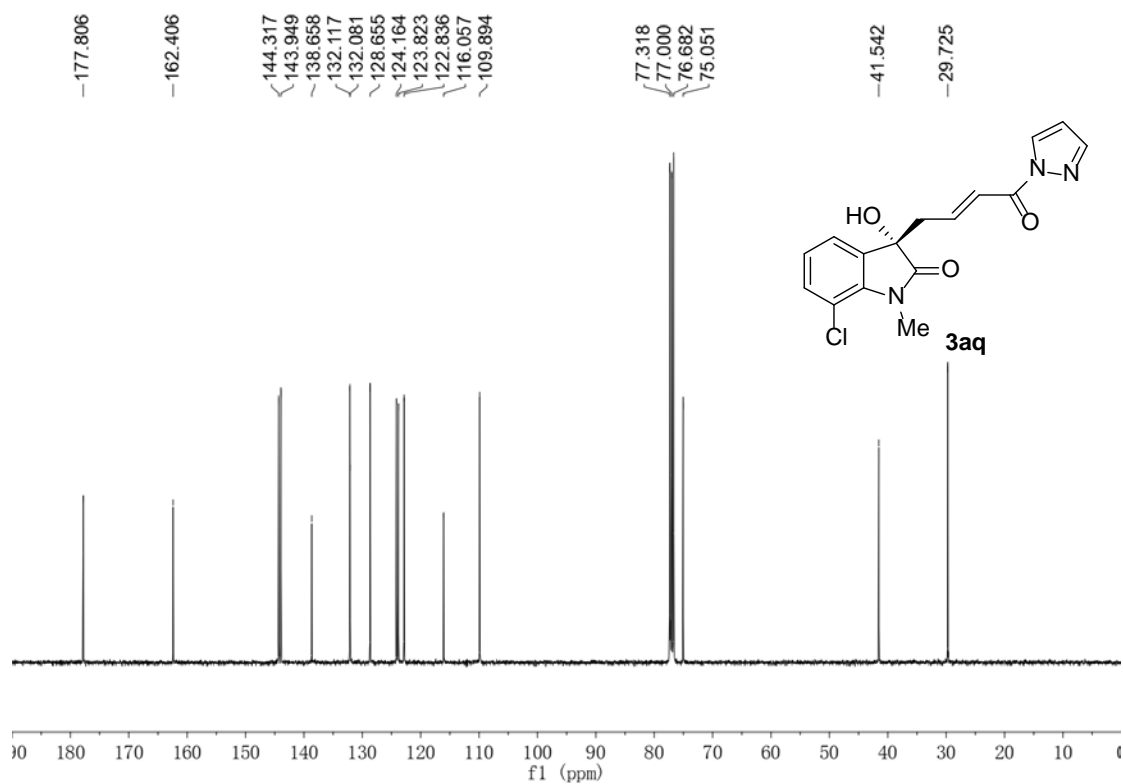

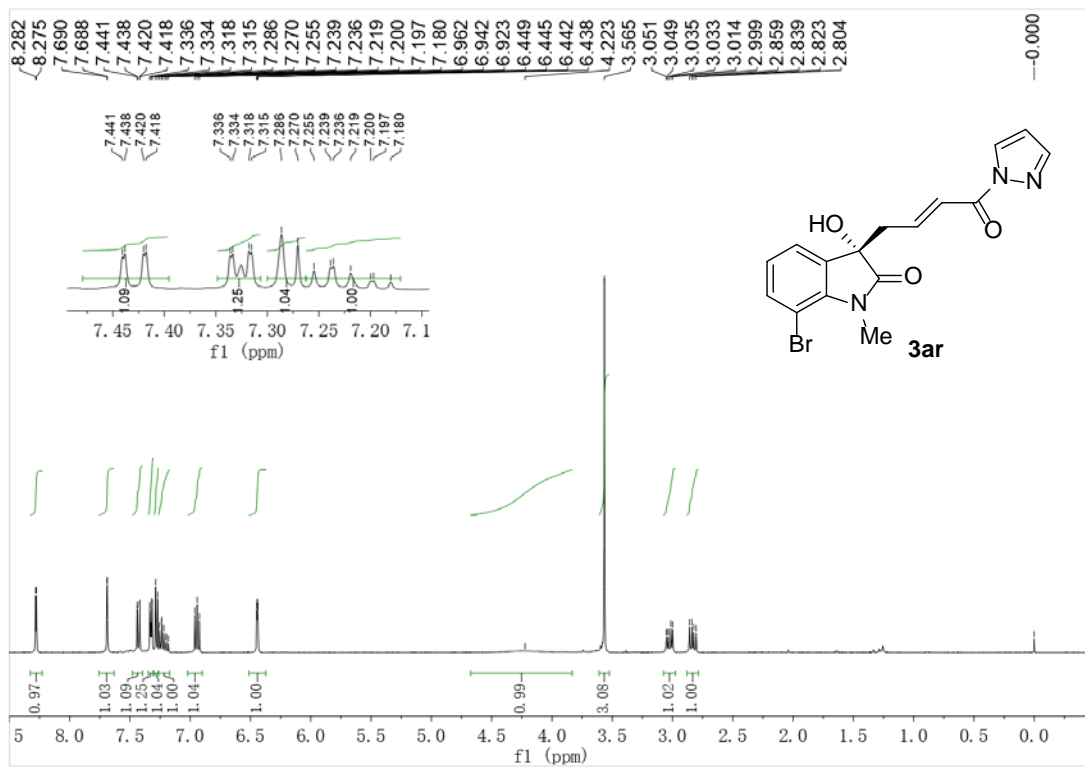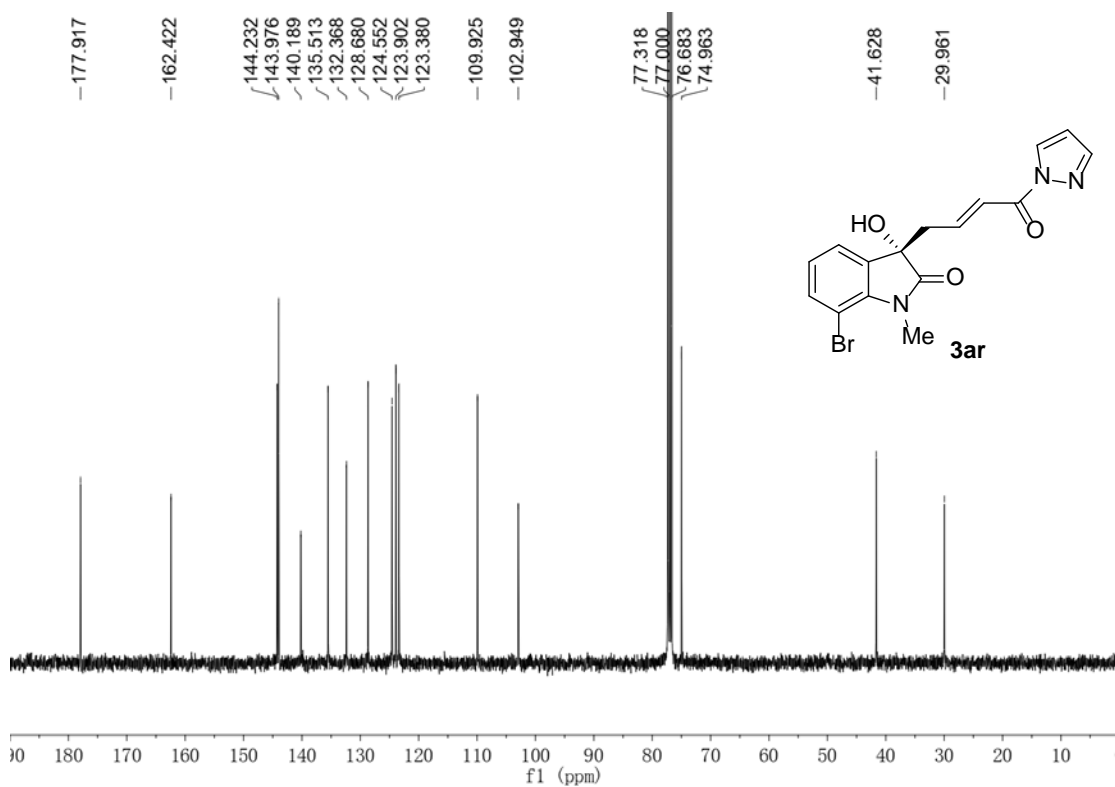

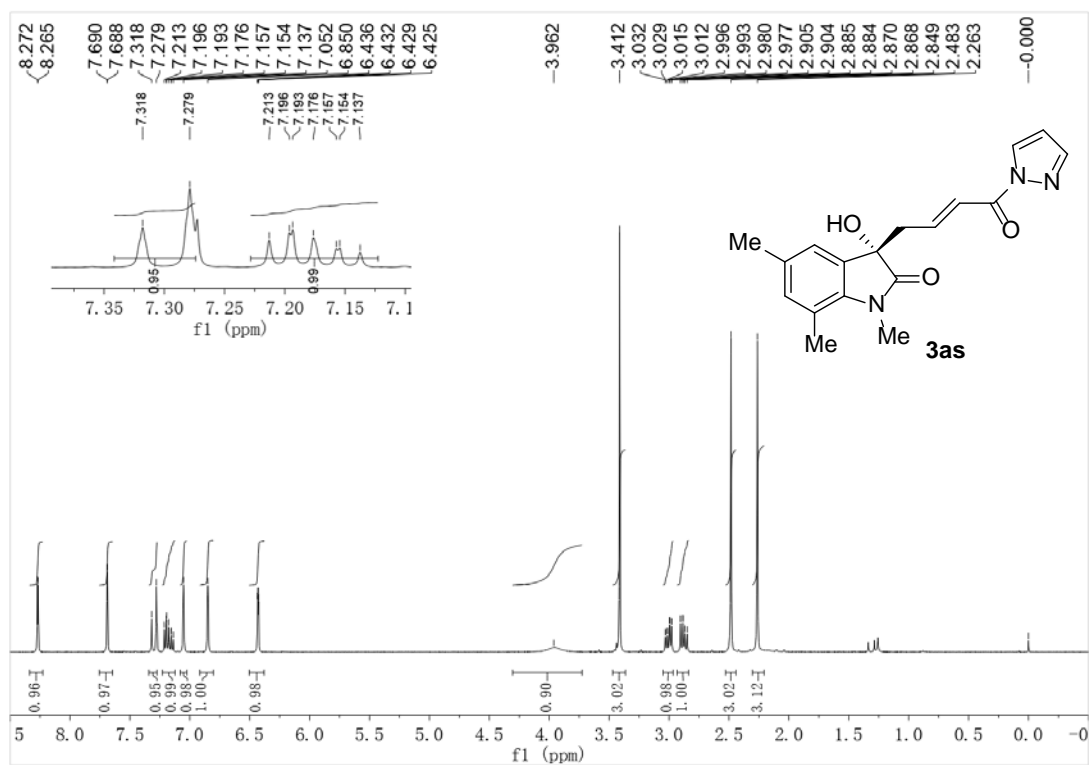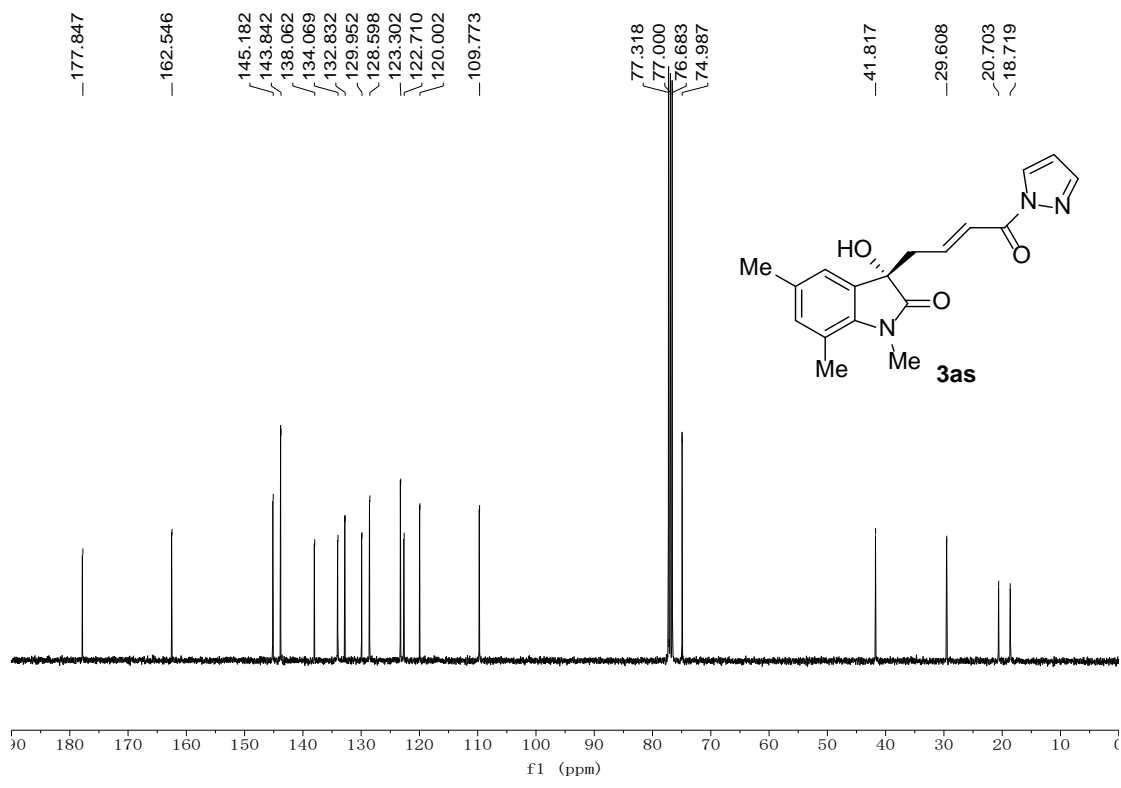

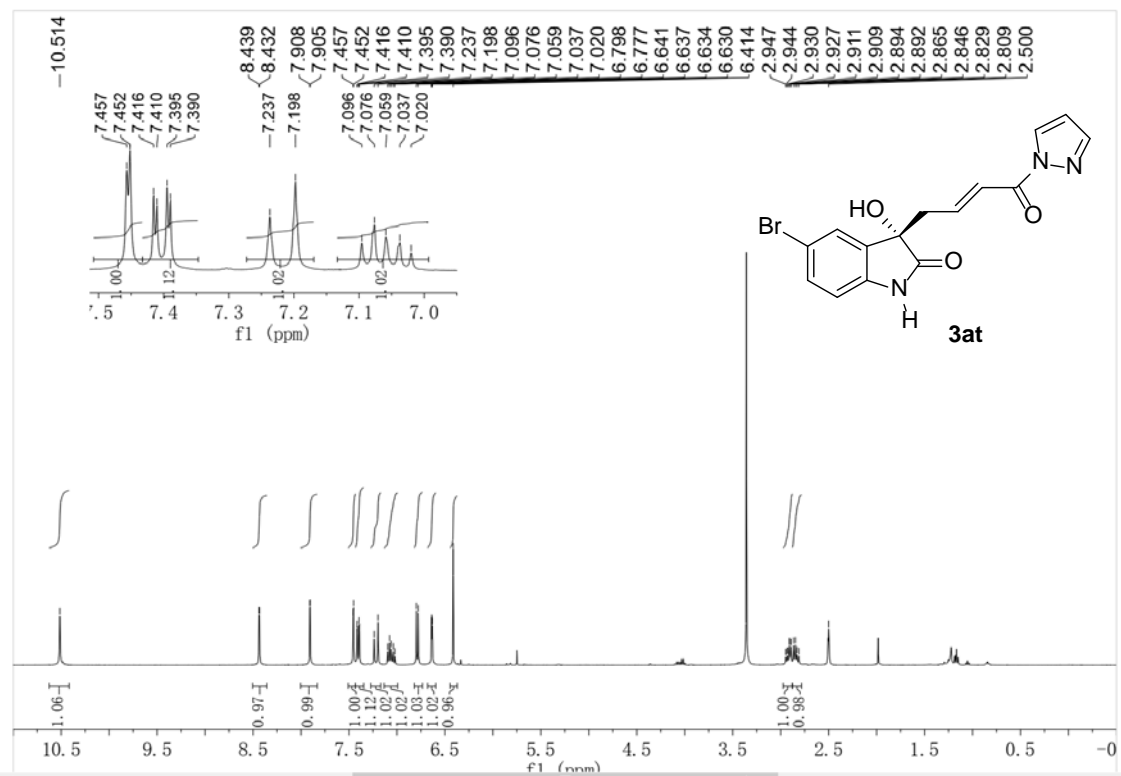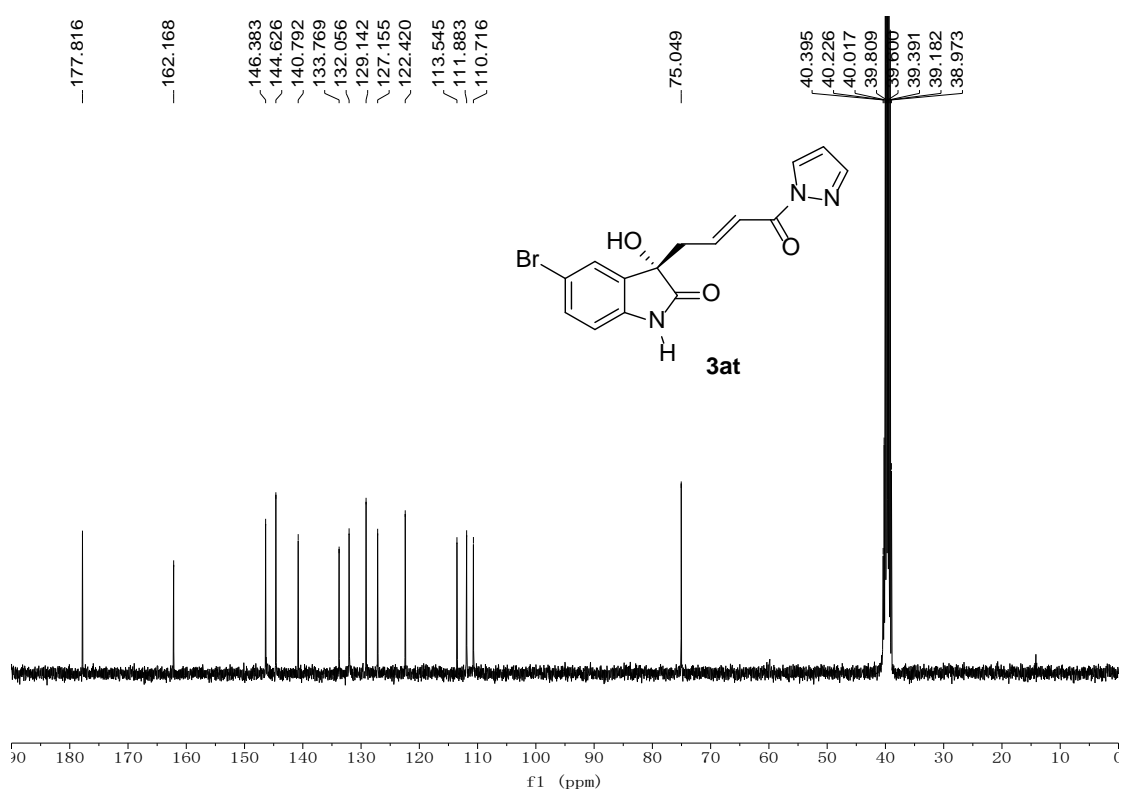

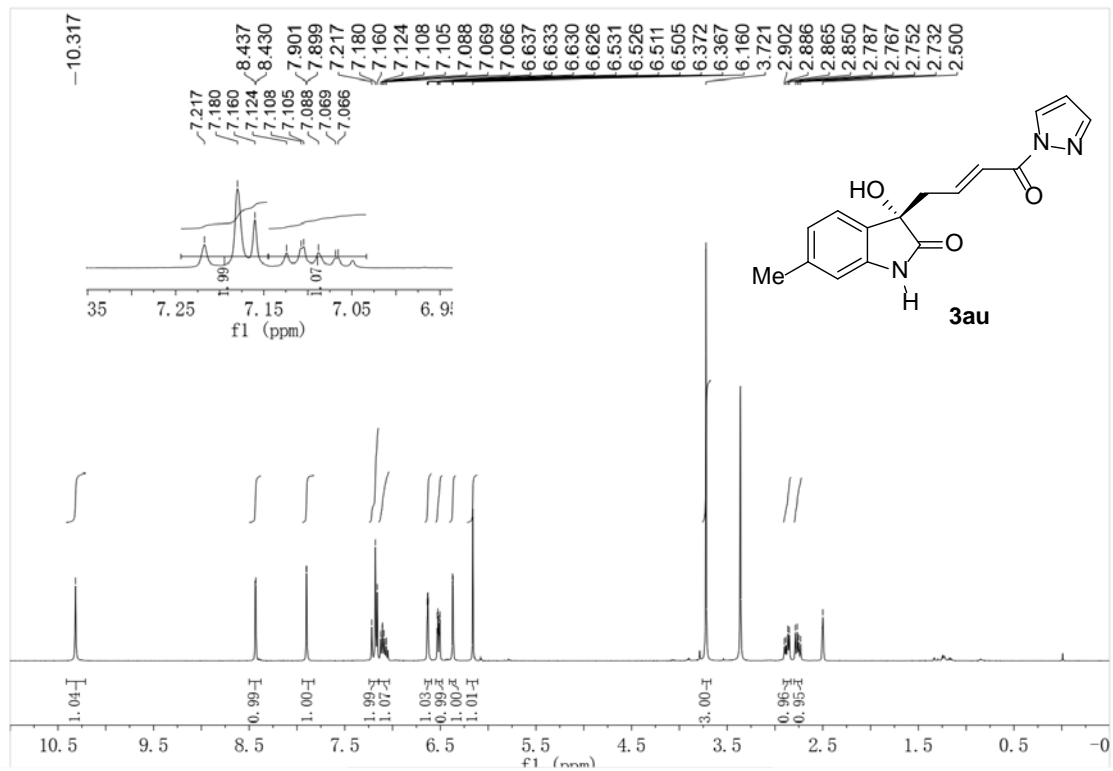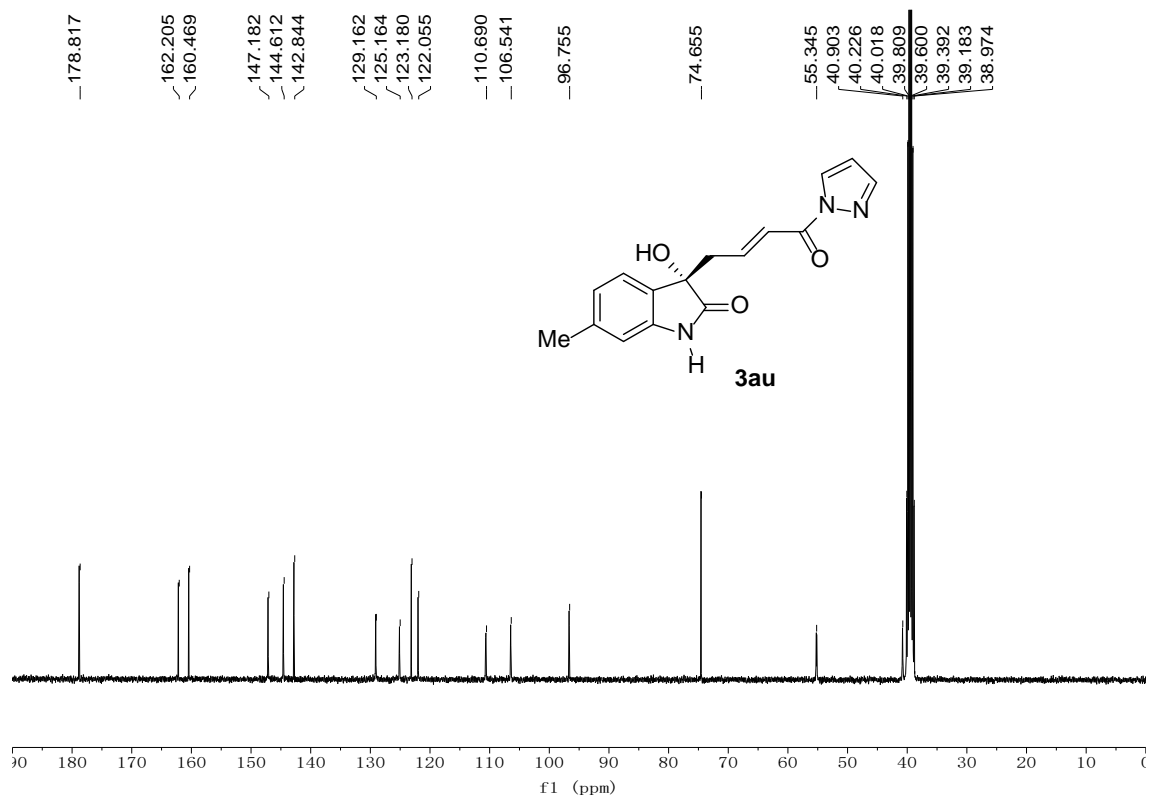

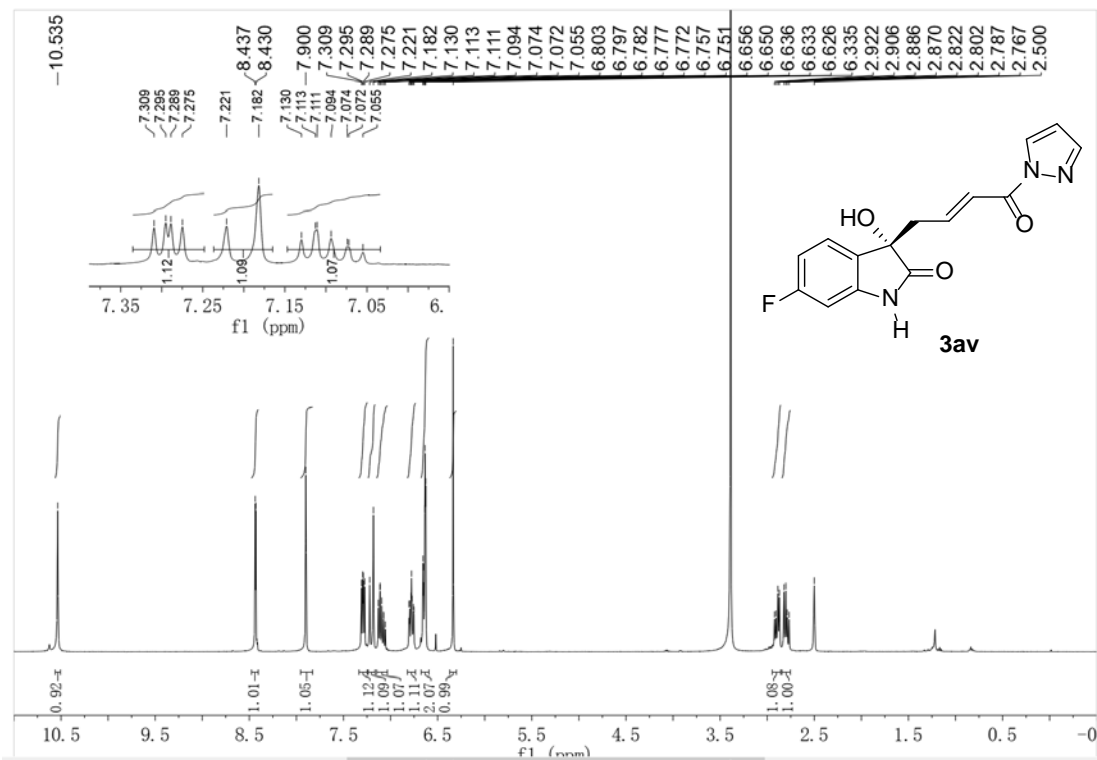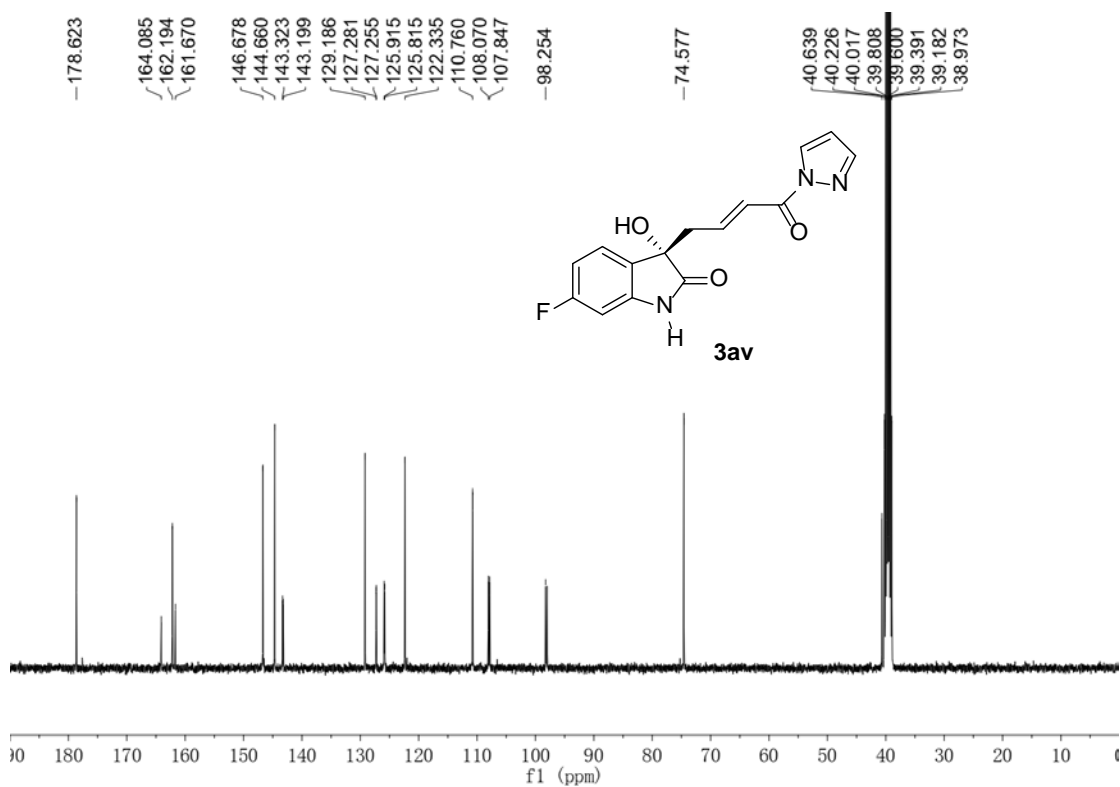



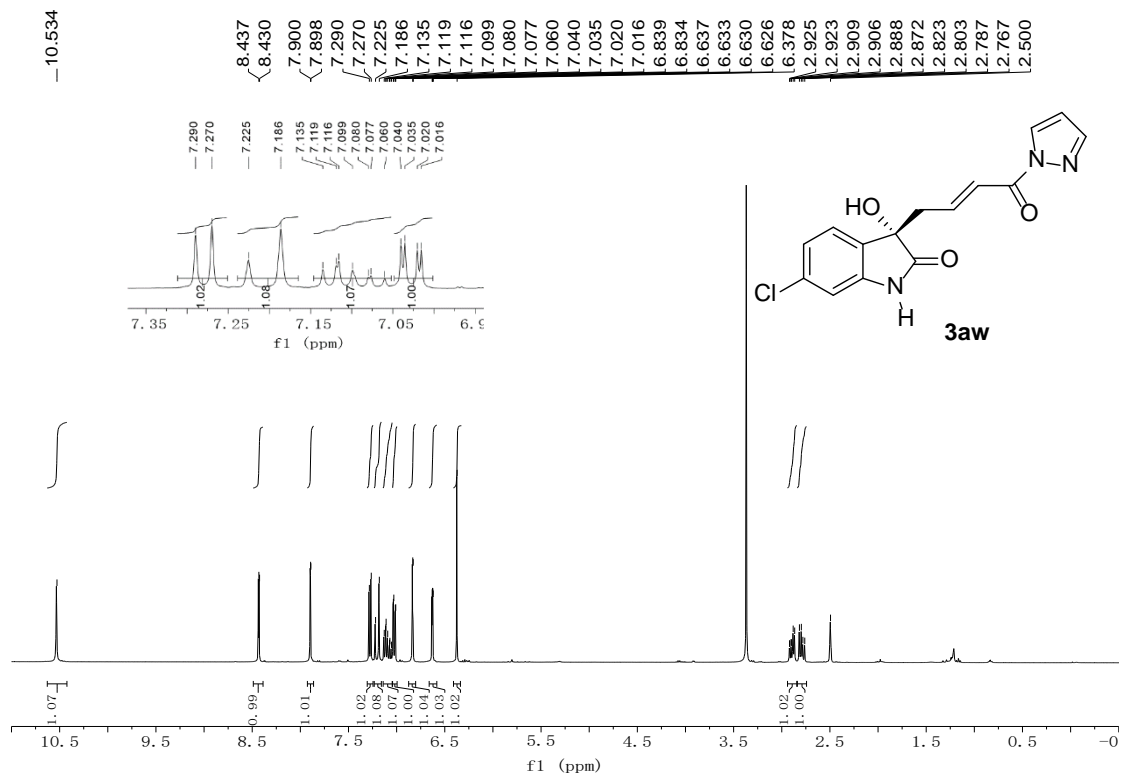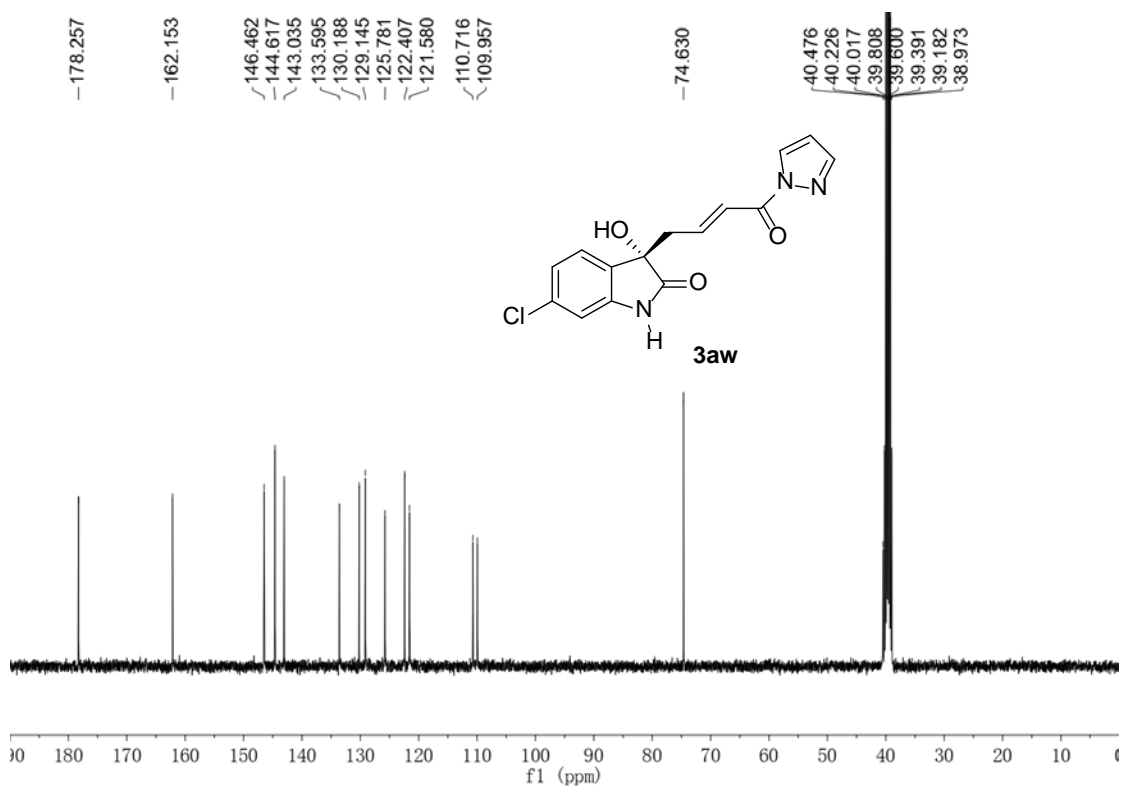

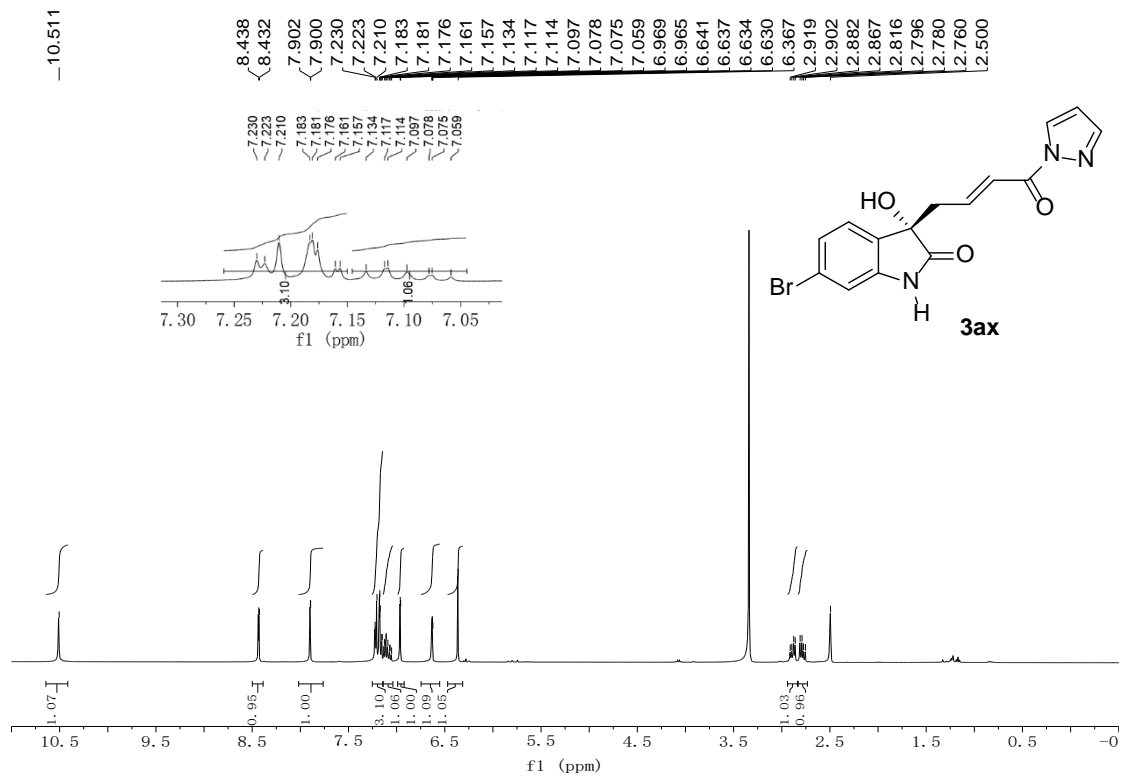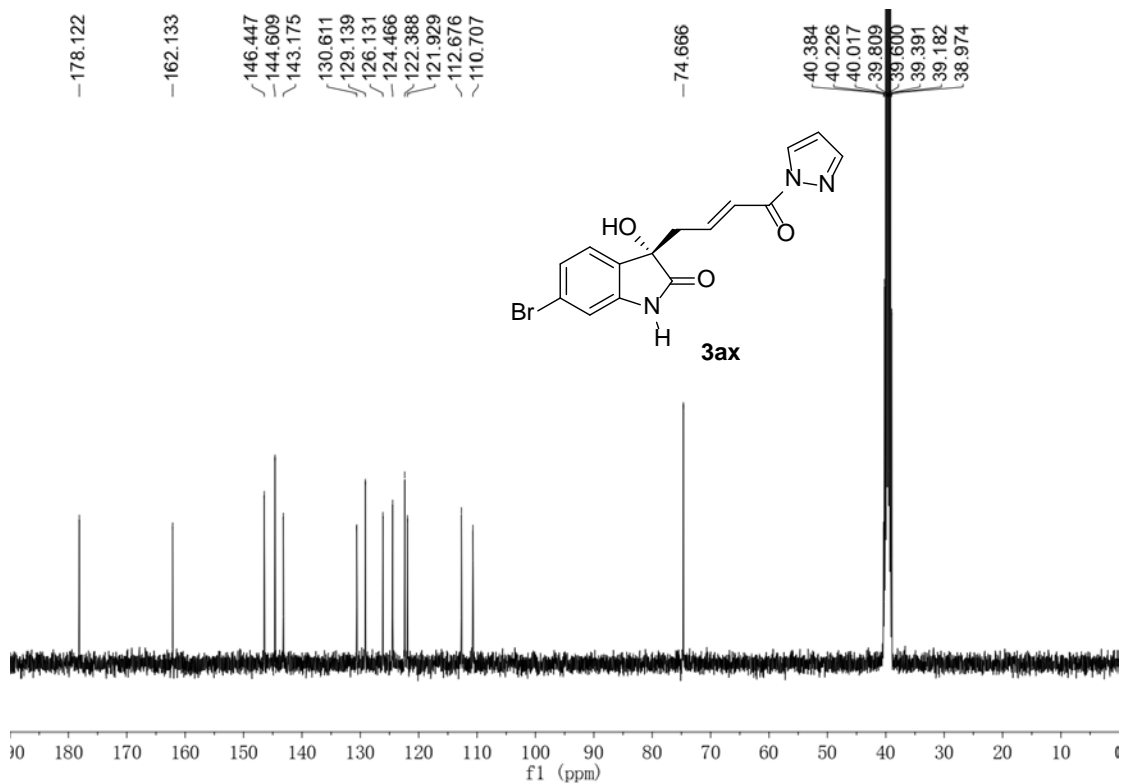

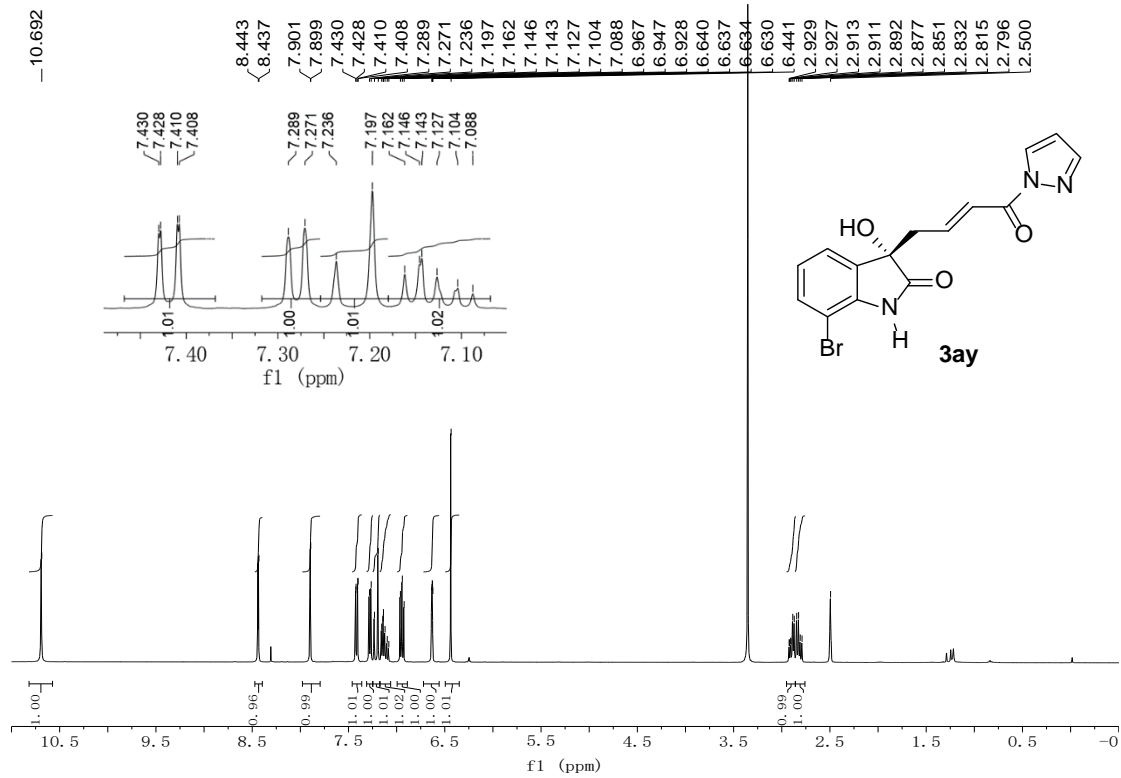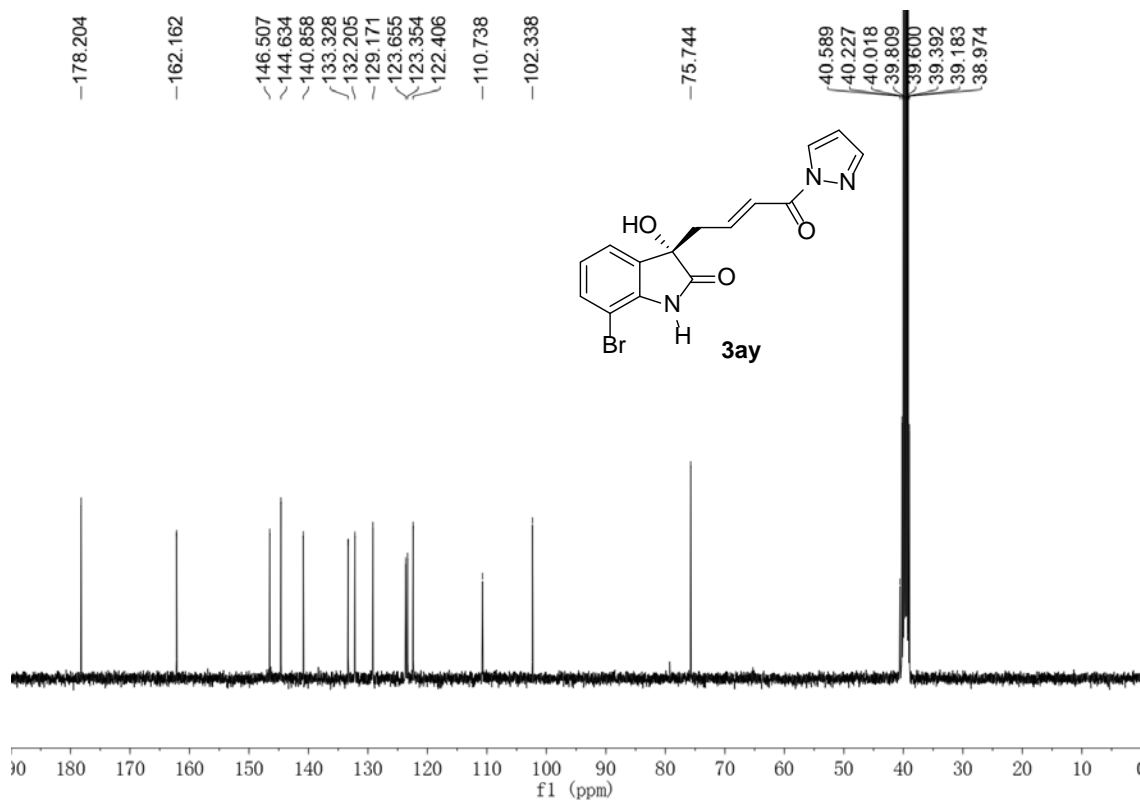

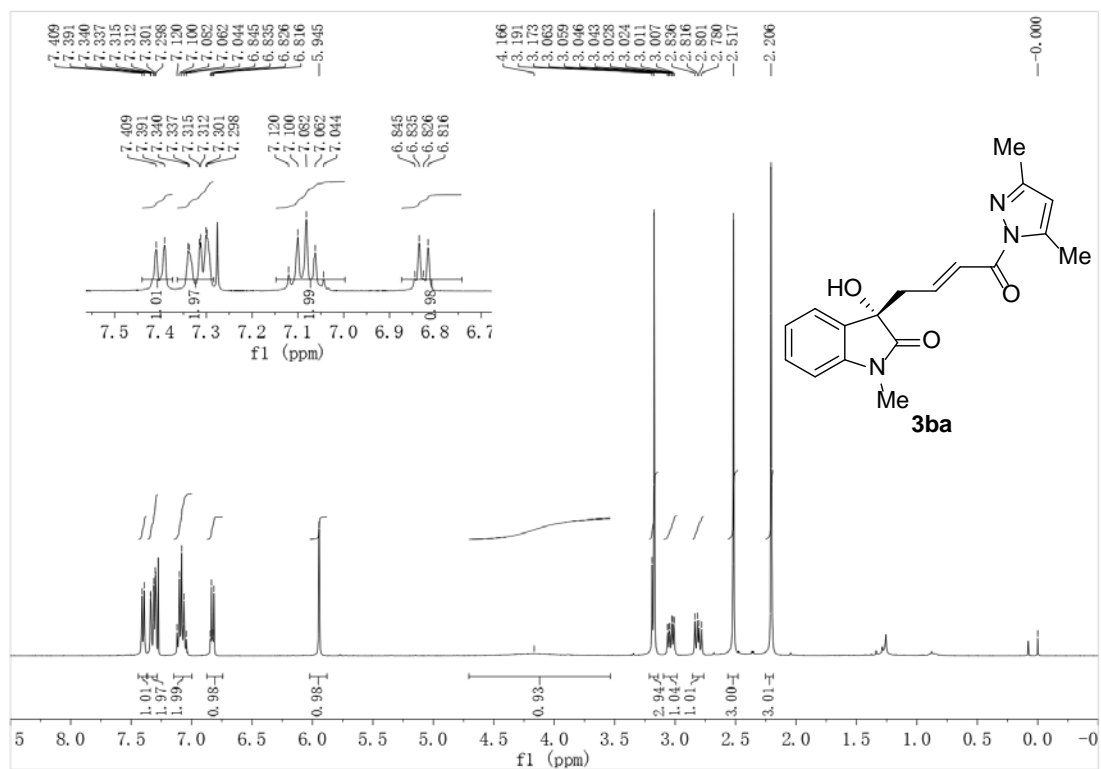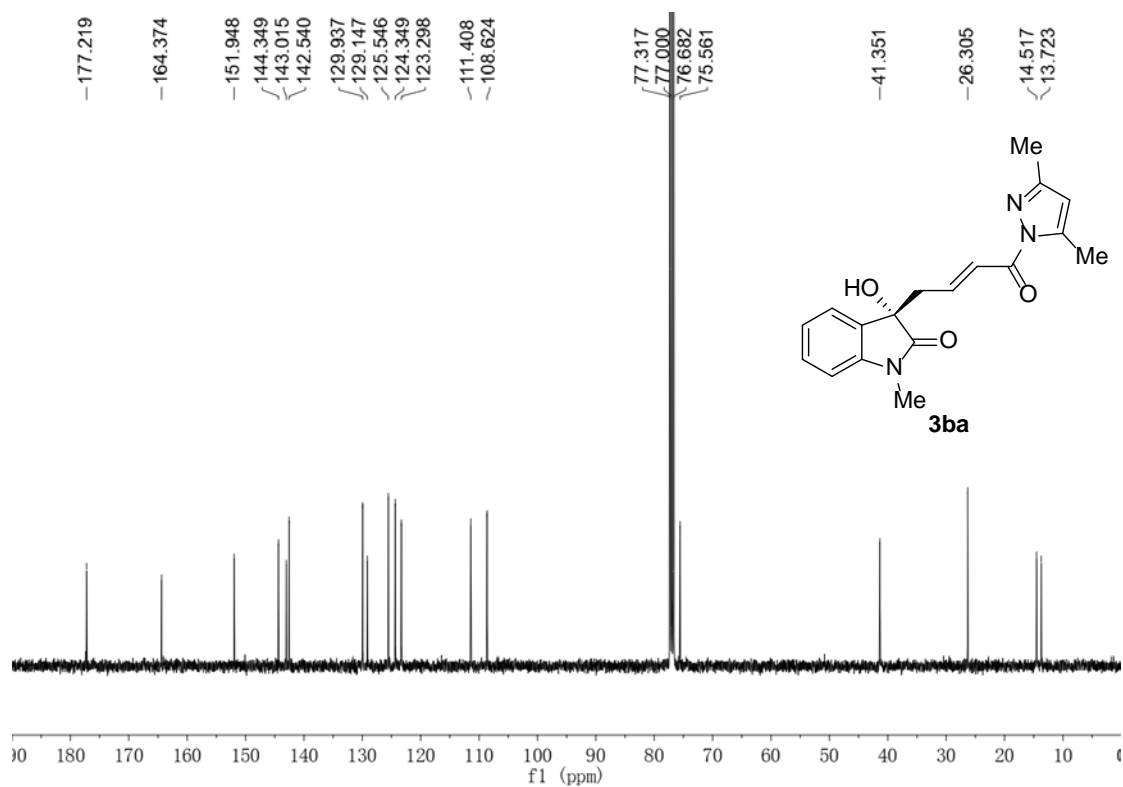

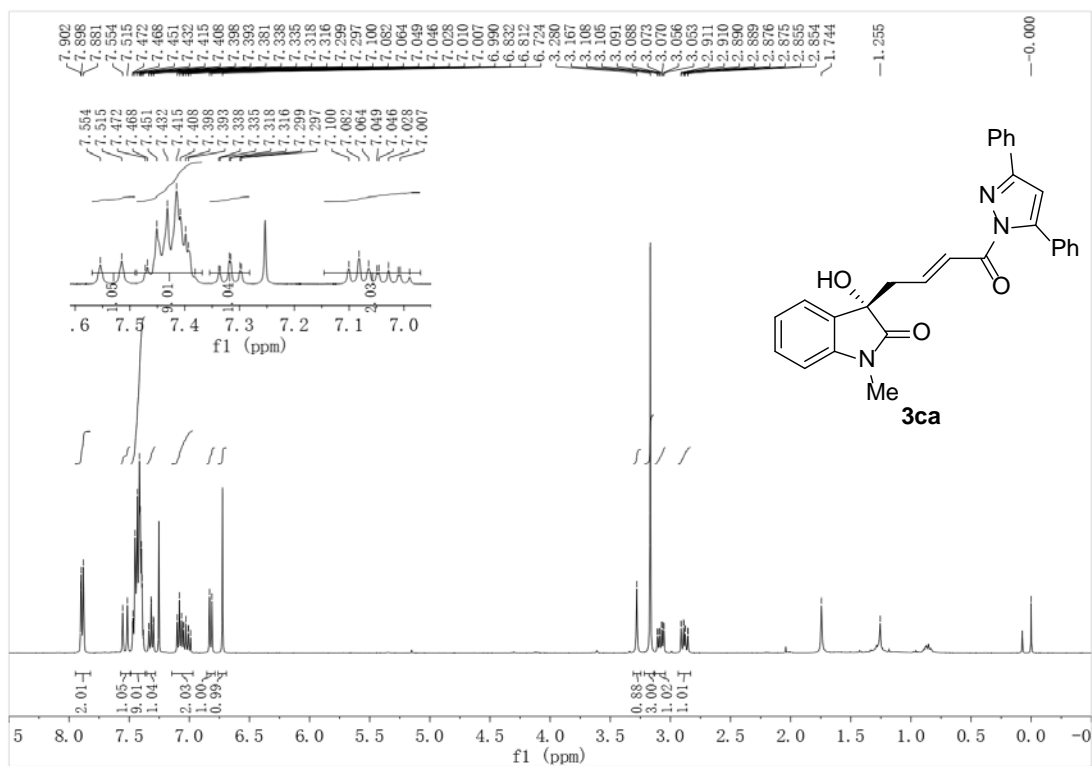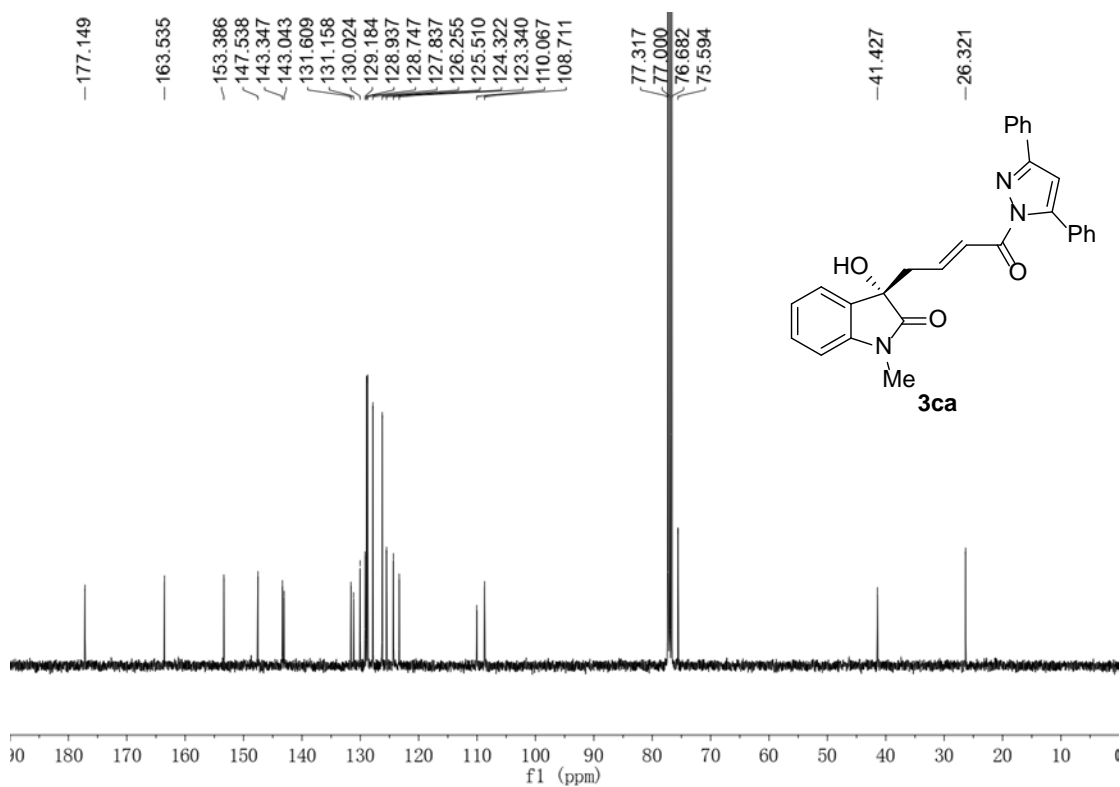

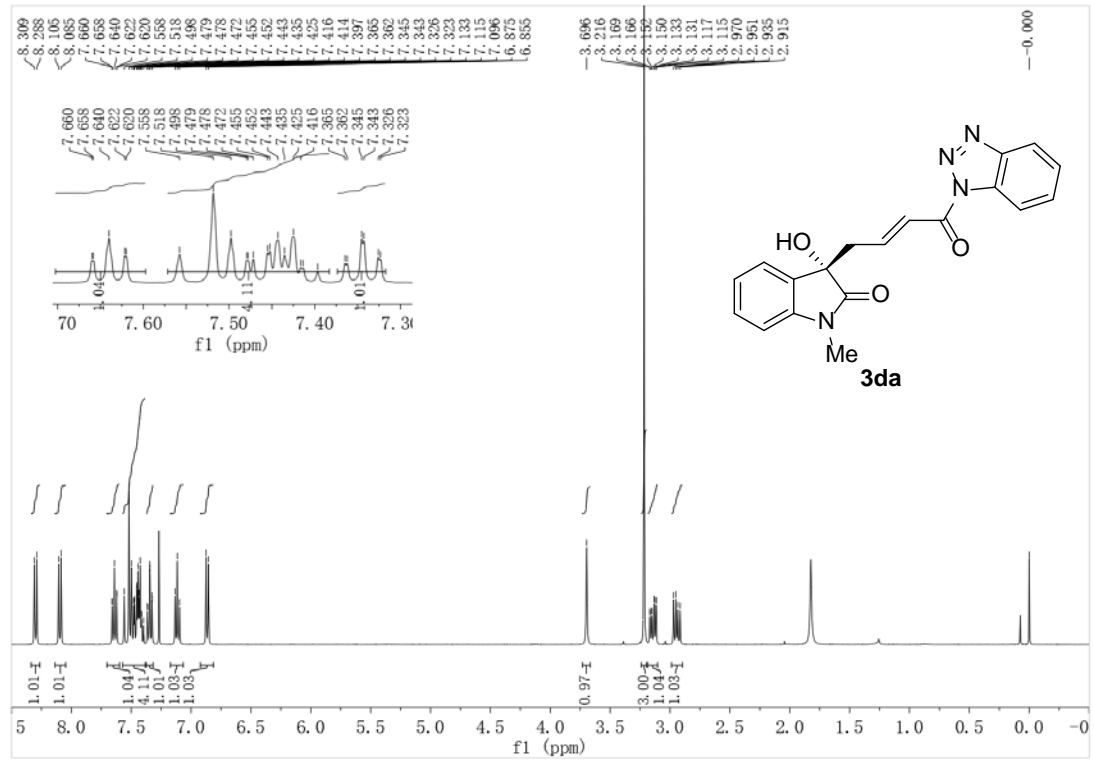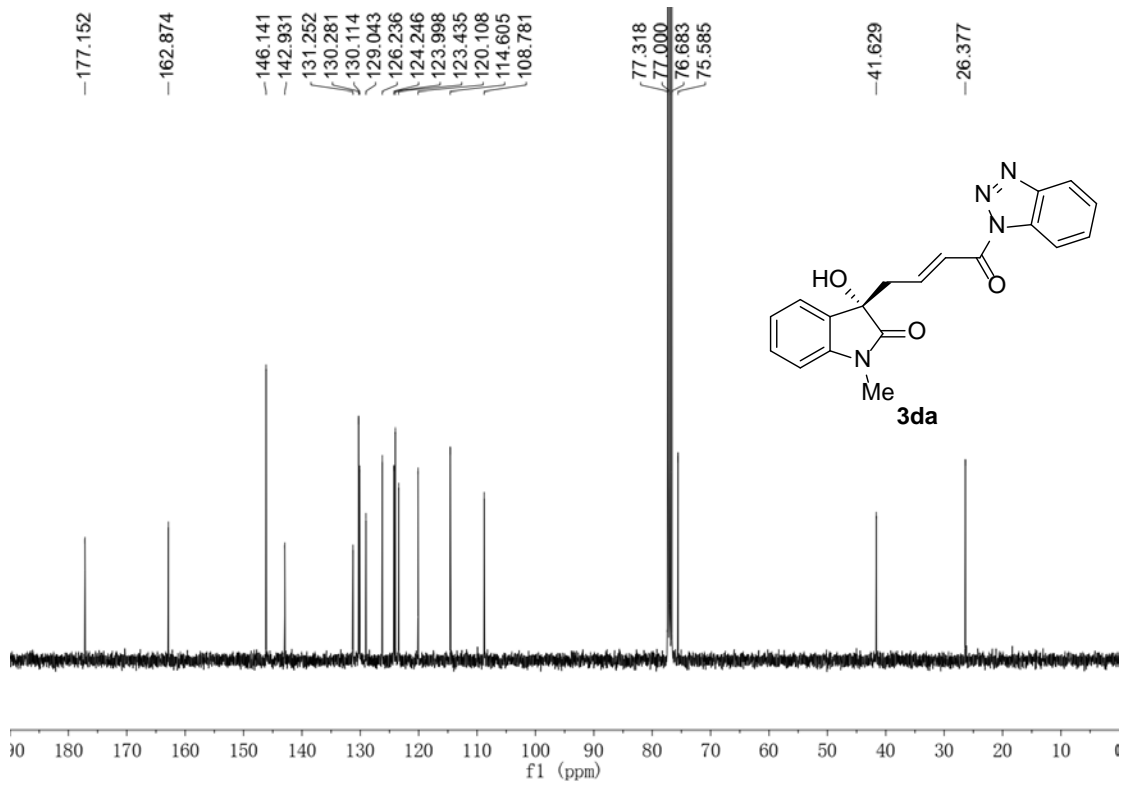

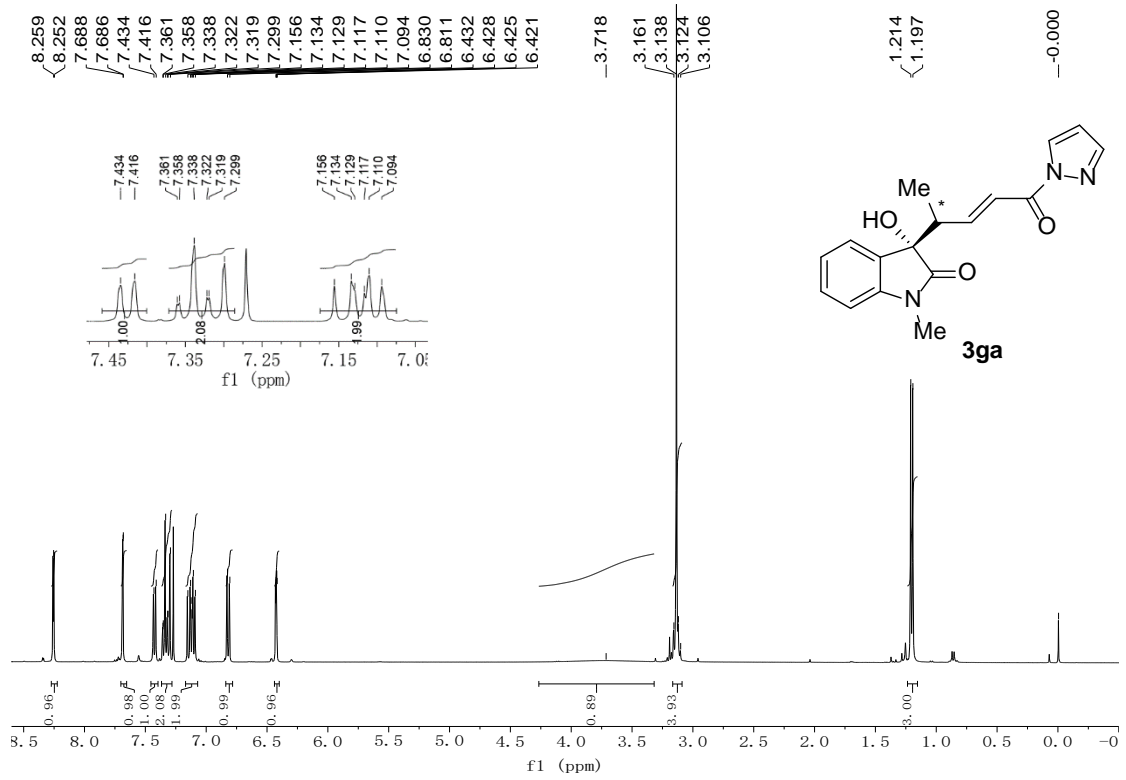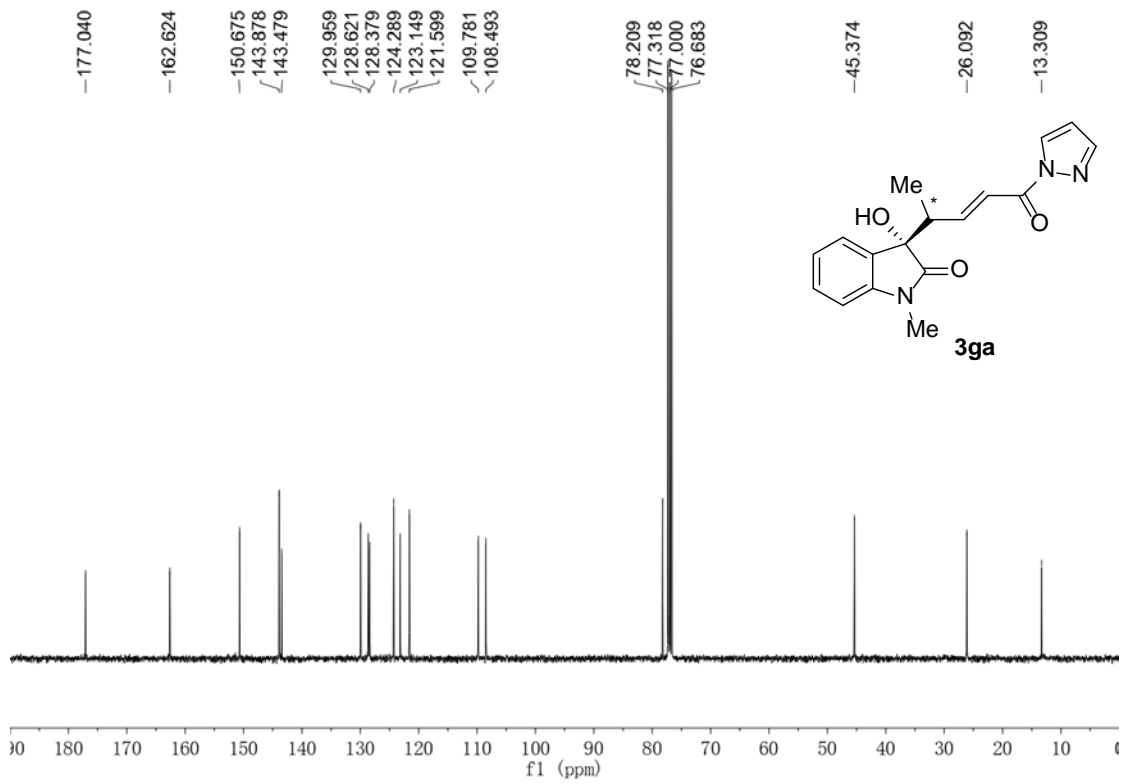

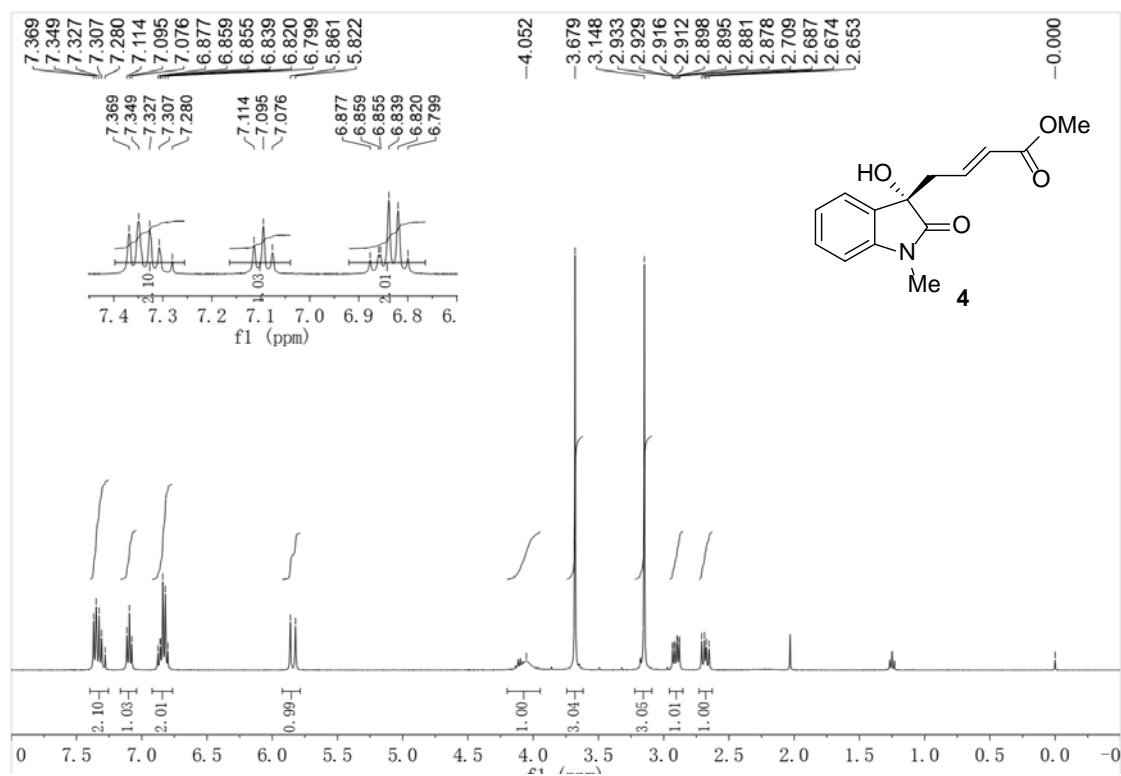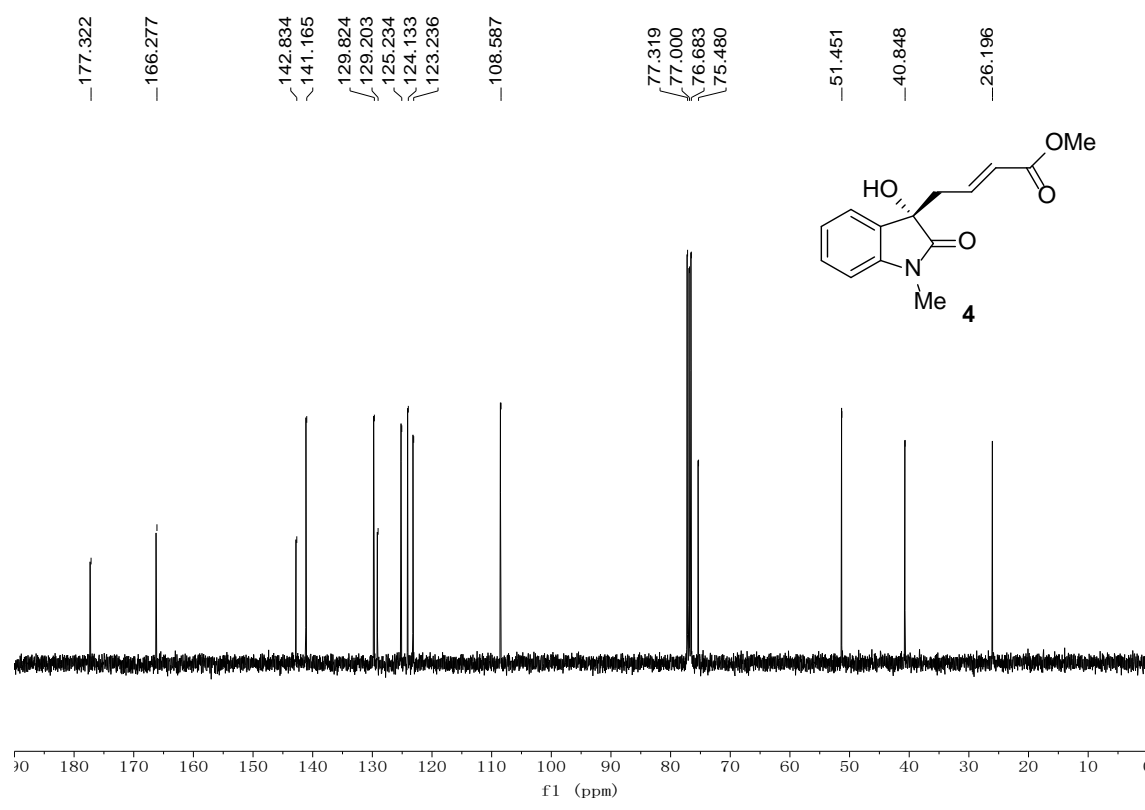



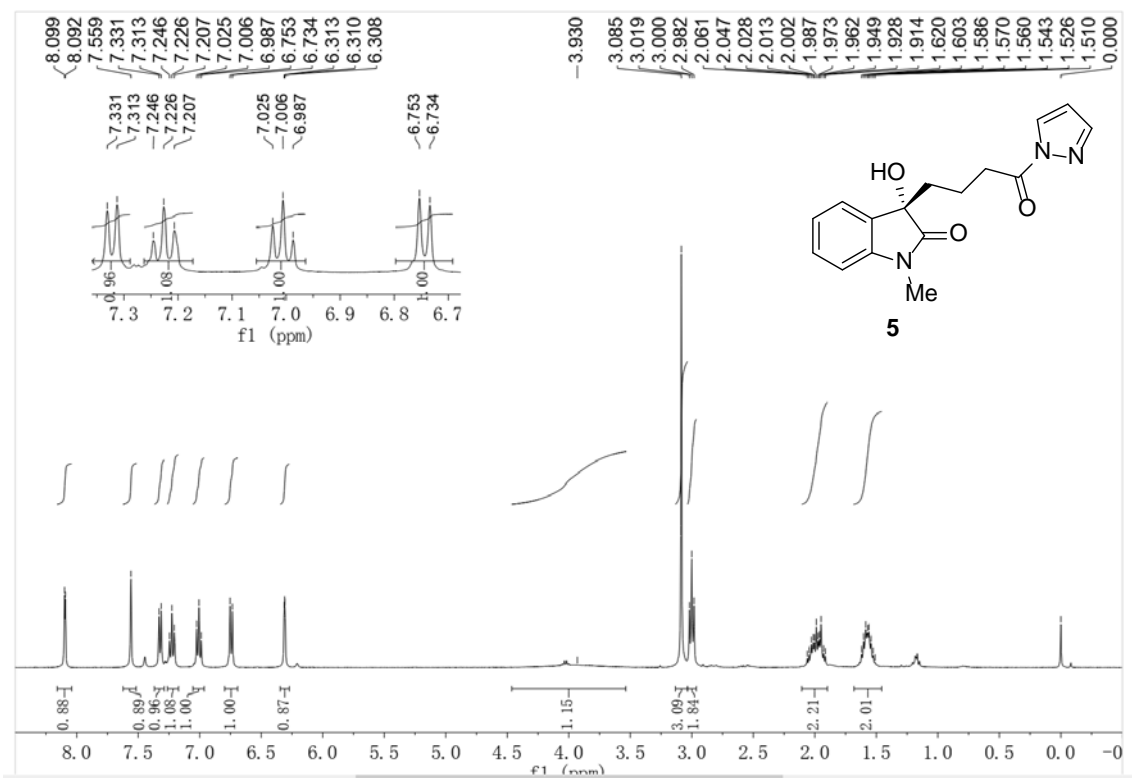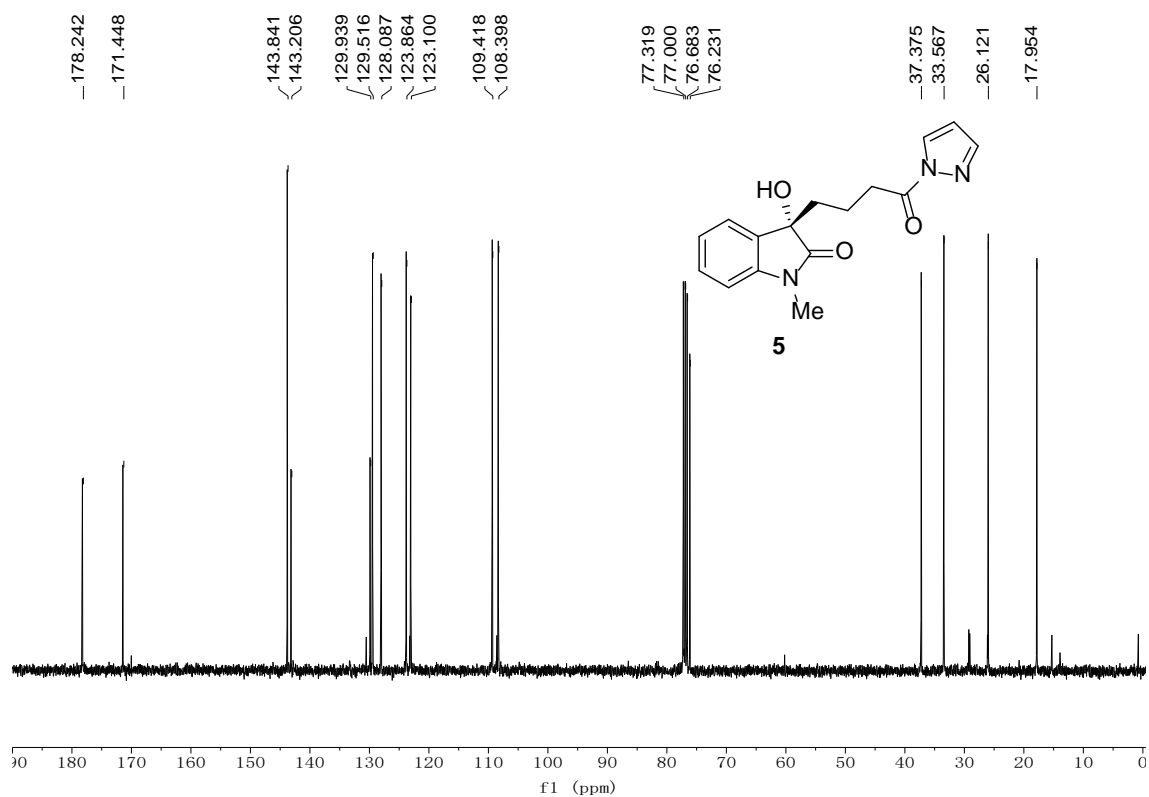

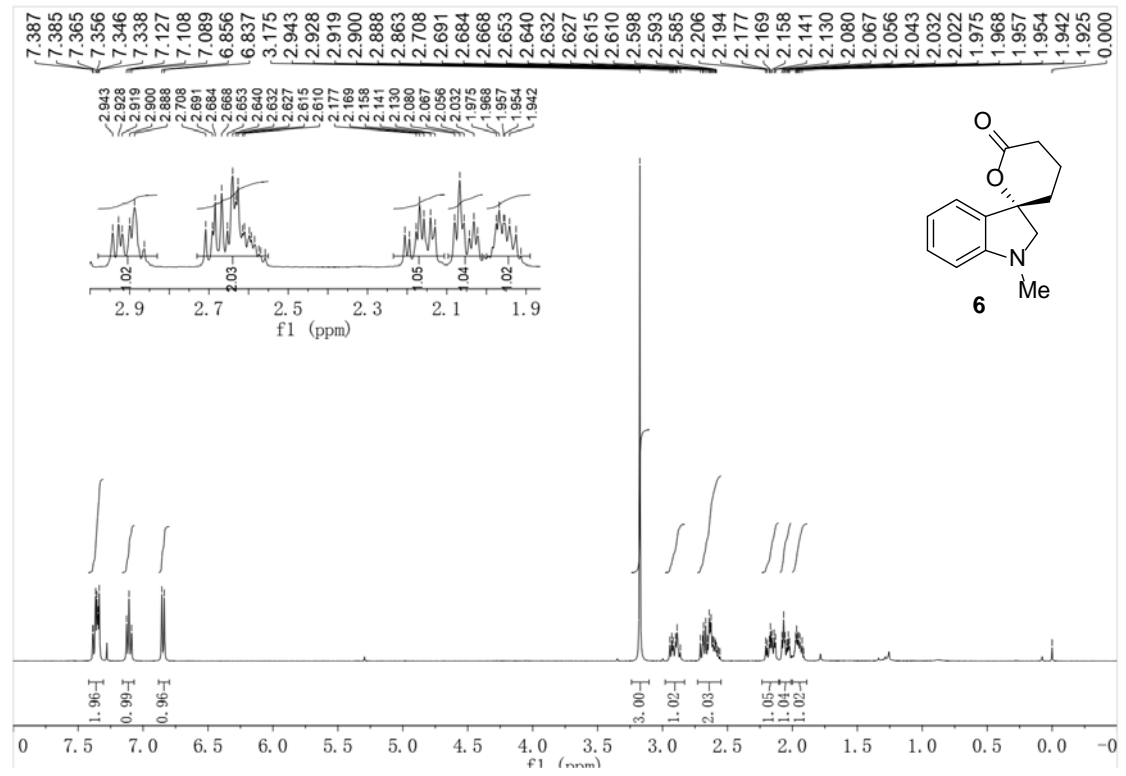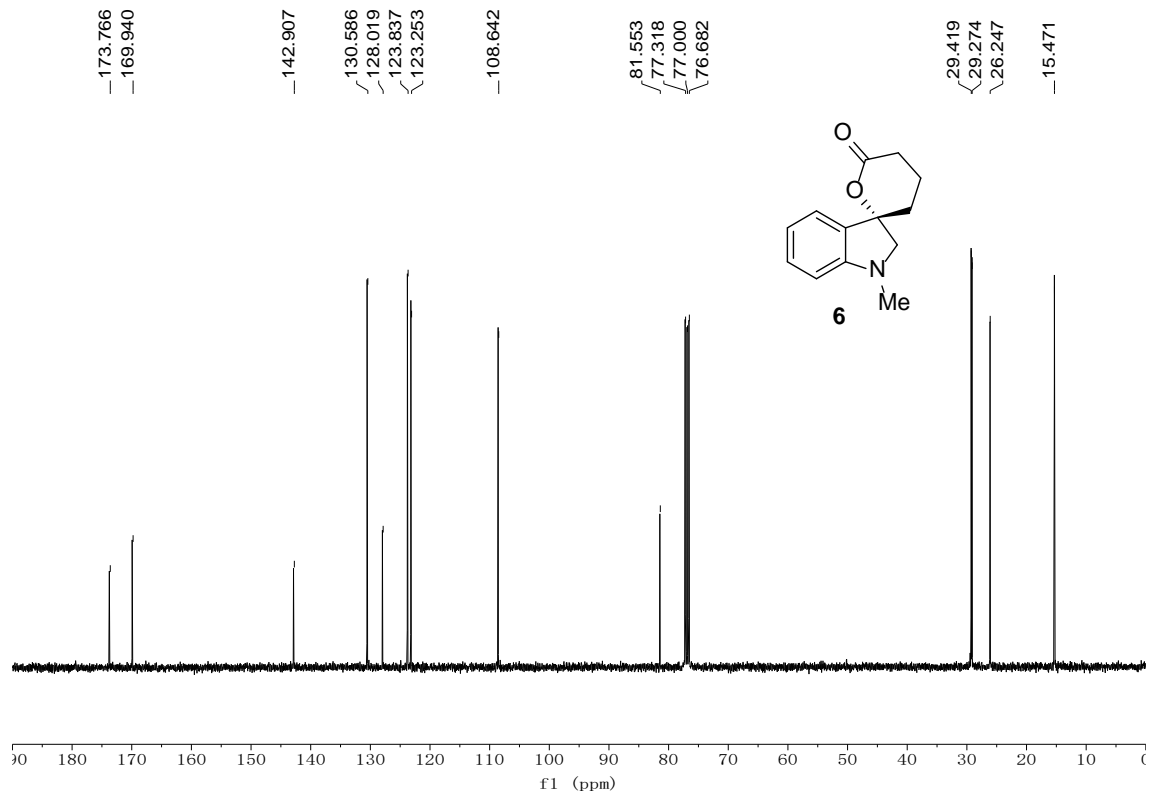

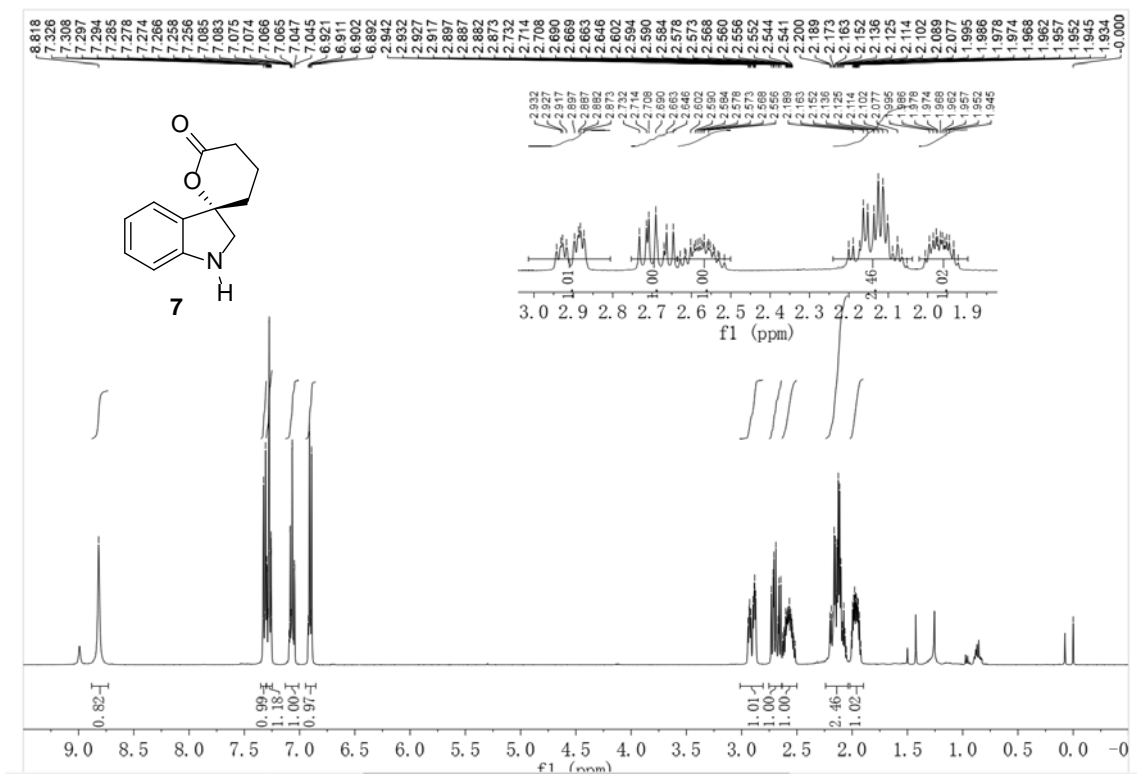

## 8. Copies of HPLC Spectra for the Product 3-7

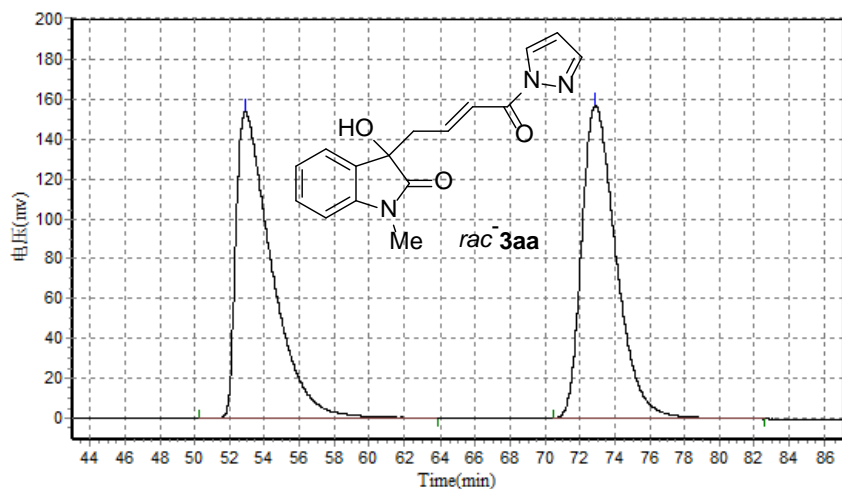

### Results

| Peak No.     | Peak ID | Ret Time | Height     | Area         | Conc.    |
|--------------|---------|----------|------------|--------------|----------|
| 1            |         | 52.927   | 153506.453 | 21771754.000 | 50.2048  |
| 2            |         | 72.882   | 157139.234 | 21594142.000 | 49.7952  |
| <b>Total</b> |         |          | 310645.688 | 43365896.000 | 100.0000 |

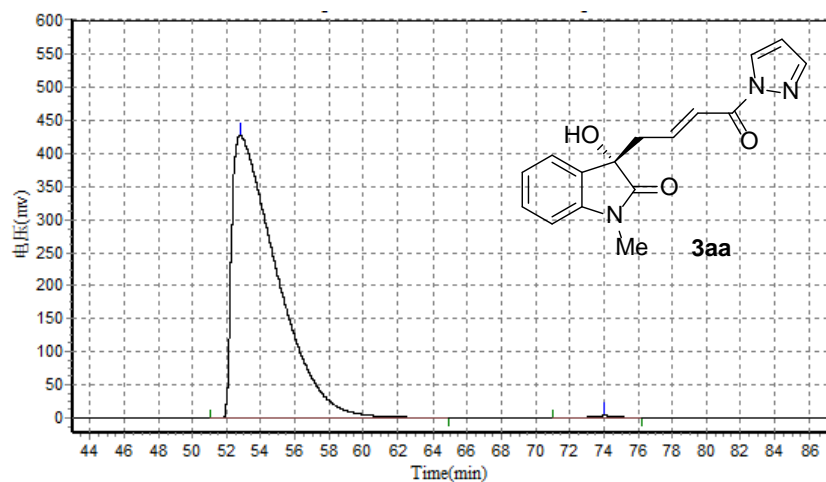

### Results

| Peak No.     | Peak ID | Ret Time | Height     | Area         | Conc.    |
|--------------|---------|----------|------------|--------------|----------|
| 1            |         | 52.787   | 427313.031 | 78144656.000 | 99.4518  |
| 2            |         | 74.002   | 3756.249   | 430748.688   | 0.5482   |
| <b>Total</b> |         |          | 431069.280 | 78575404.688 | 100.0000 |

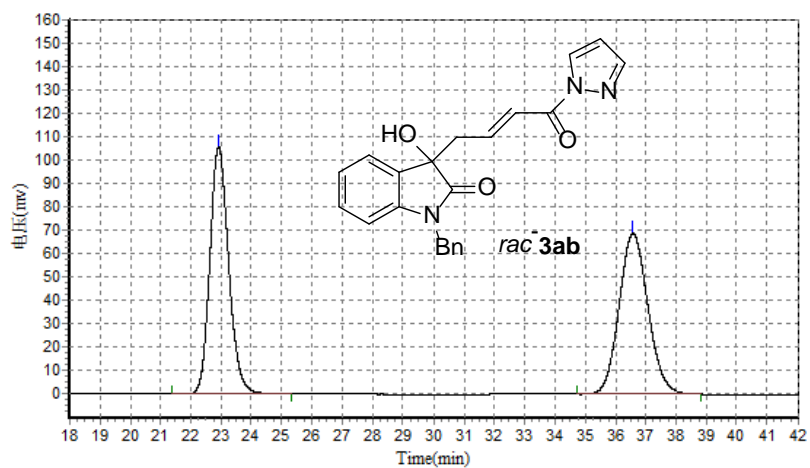

### Results

| Peak No.     | Peak ID | Ret Time | Height     | Area        | Conc.    |
|--------------|---------|----------|------------|-------------|----------|
| 1            |         | 22.922   | 105893.891 | 4550180.500 | 49.8687  |
| 2            |         | 36.575   | 68925.500  | 4574133.000 | 50.1313  |
| <b>Total</b> |         |          | 174819.391 | 9124313.500 | 100.0000 |

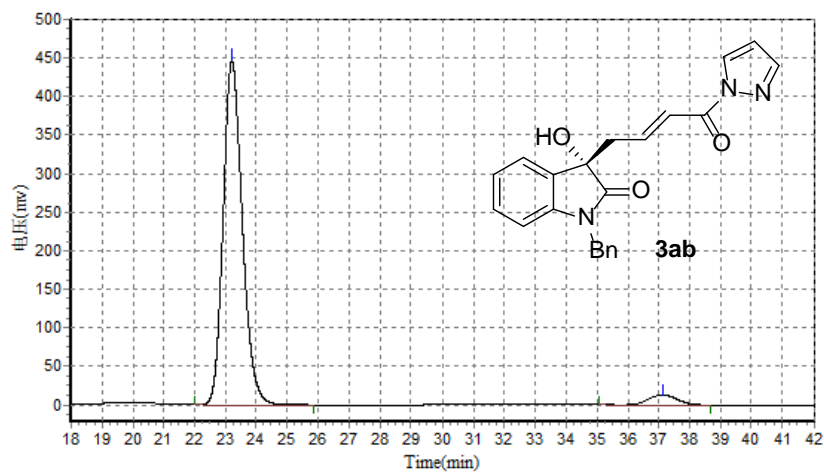

### Results

| Peak No.     | Peak ID | Ret Time | Height     | Area         | Conc.    |
|--------------|---------|----------|------------|--------------|----------|
| 1            |         | 23.210   | 445985.844 | 19231278.000 | 95.7620  |
| 2            |         | 37.112   | 13421.620  | 851098.375   | 4.2380   |
| <b>Total</b> |         |          | 459407.464 | 20082376.375 | 100.0000 |

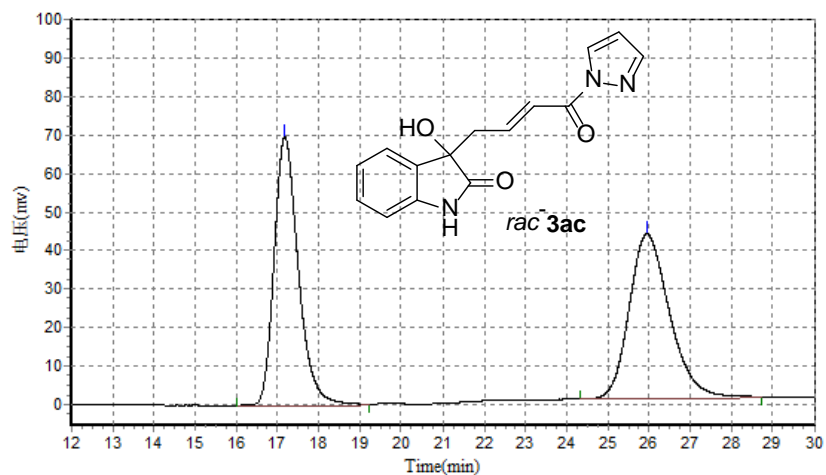

### Results

| Peak No.     | Peak ID | Ret Time | Height     | Area        | Conc.    |
|--------------|---------|----------|------------|-------------|----------|
| 1            |         | 17.177   | 69609.977  | 2824763.000 | 49.4856  |
| 2            |         | 25.950   | 42567.582  | 2883485.000 | 50.5144  |
| <b>Total</b> |         |          | 112177.559 | 5708248.000 | 100.0000 |

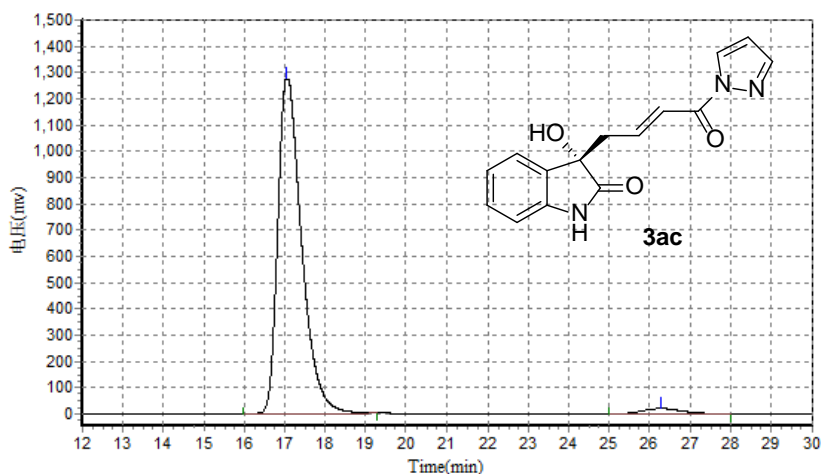

### Results

| Peak No.     | Peak ID | Ret Time | Height      | Area         | Conc.    |
|--------------|---------|----------|-------------|--------------|----------|
| 1            |         | 17.025   | 1270693.500 | 52179548.000 | 97.3975  |
| 2            |         | 26.267   | 20522.543   | 1394268.125  | 2.6025   |
| <b>Total</b> |         |          | 1291216.043 | 53573816.125 | 100.0000 |

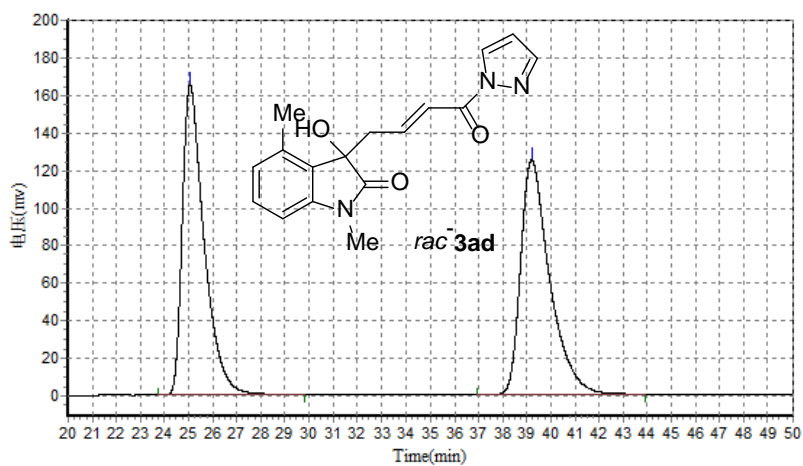

### Results

| Peak No.     | Peak ID | Ret Time | Height     | Area         | Conc.    |
|--------------|---------|----------|------------|--------------|----------|
| 1            |         | 25.058   | 165389.641 | 10354877.000 | 49.8566  |
| 2            |         | 39.192   | 124996.297 | 10414444.000 | 50.1434  |
| <b>Total</b> |         |          | 290385.938 | 20769321.000 | 100.0000 |

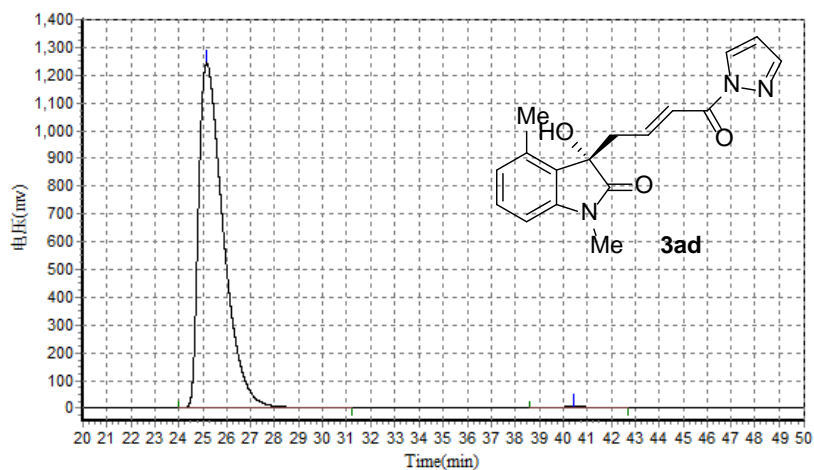

### Results

| Peak No.     | Peak ID | Ret Time | Height      | Area         | Conc.    |
|--------------|---------|----------|-------------|--------------|----------|
| 1            |         | 25.170   | 1242418.375 | 88704712.000 | 99.4494  |
| 2            |         | 40.427   | 6226.643    | 491126.500   | 0.5506   |
| <b>Total</b> |         |          | 1248645.018 | 89195838.500 | 100.0000 |

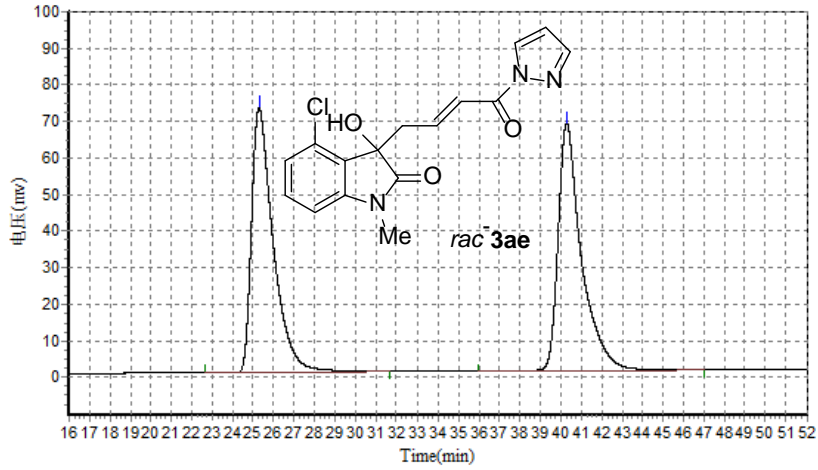

### Results

| Peak No.     | Peak ID | Ret Time | Height     | Area         | Conc.    |
|--------------|---------|----------|------------|--------------|----------|
| 1            |         | 25.292   | 72303.344  | 5314339.500  | 49.9955  |
| 2            |         | 40.285   | 67477.125  | 5315300.000  | 50.0045  |
| <b>Total</b> |         |          | 139780.469 | 10629639.500 | 100.0000 |

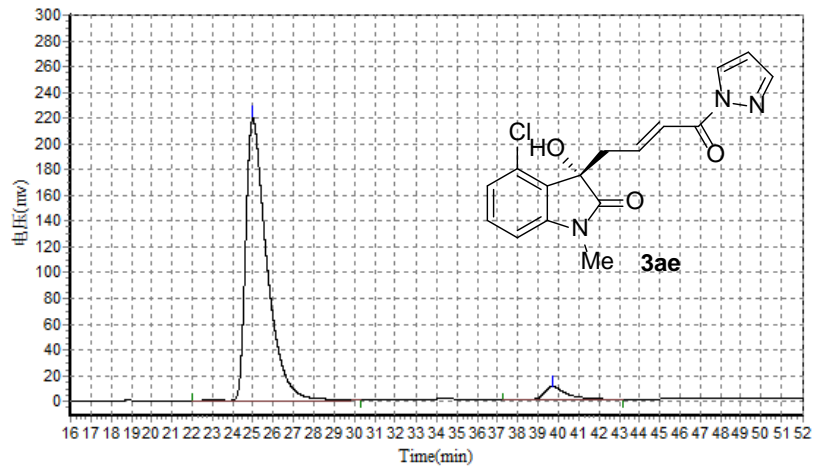

### Results

| Peak No.     | Peak ID | Ret Time | Height     | Area         | Conc.    |
|--------------|---------|----------|------------|--------------|----------|
| 1            |         | 24.988   | 219262.438 | 15738429.000 | 95.4882  |
| 2            |         | 39.723   | 10098.634  | 743645.438   | 4.5118   |
| <b>Total</b> |         |          | 229361.071 | 16482074.438 | 100.0000 |



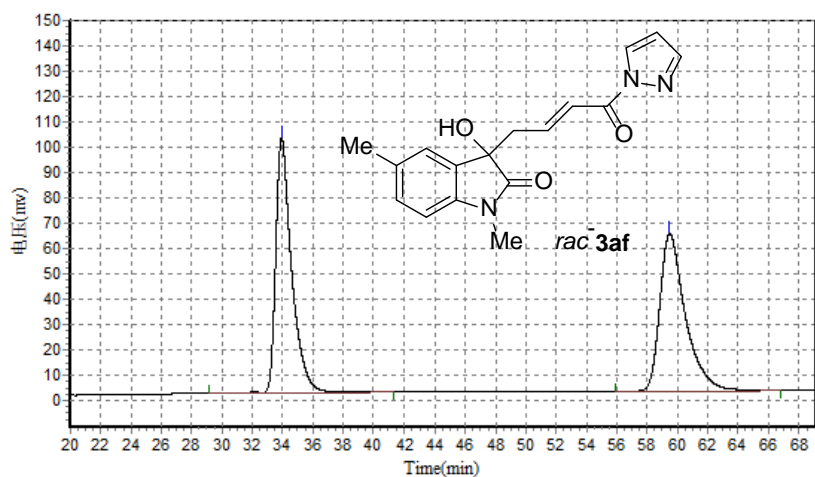

### Results

| Peak No.     | Peak ID | Ret Time | Height     | Area         | Conc.    |
|--------------|---------|----------|------------|--------------|----------|
| 1            |         | 33.940   | 100819.203 | 7362127.000  | 50.3781  |
| 2            |         | 59.493   | 62289.703  | 7251617.500  | 49.6219  |
| <b>Total</b> |         |          | 163108.906 | 14613744.500 | 100.0000 |

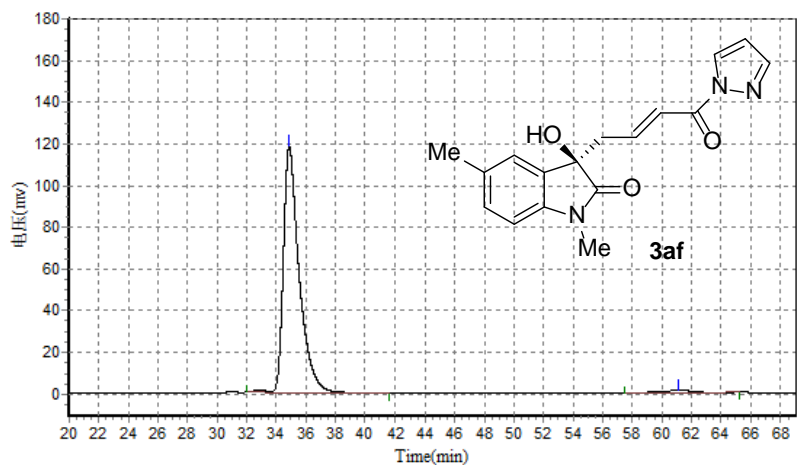

### Results

| Peak No.     | Peak ID | Ret Time | Height     | Area        | Conc.    |
|--------------|---------|----------|------------|-------------|----------|
| 1            |         | 34.875   | 118001.289 | 8733882.000 | 98.3860  |
| 2            |         | 61.105   | 1338.307   | 143274.594  | 1.6140   |
| <b>Total</b> |         |          | 119339.596 | 8877156.594 | 100.0000 |

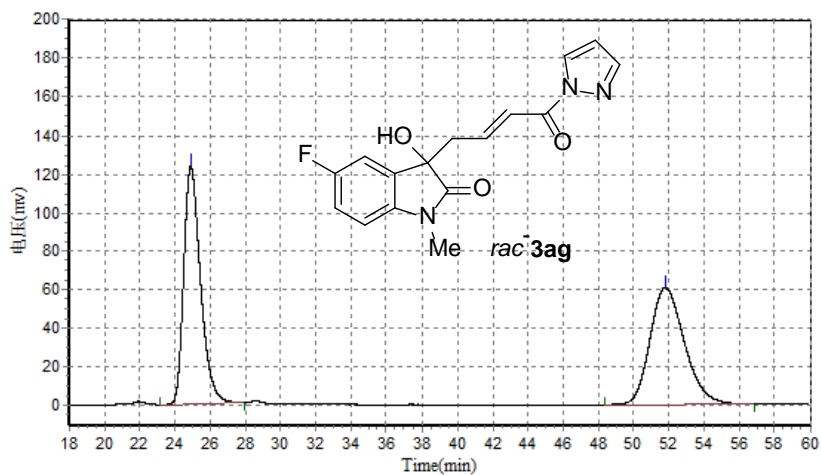

### Results

| Peak No.     | Peak ID | Ret Time | Height     | Area         | Conc.    |
|--------------|---------|----------|------------|--------------|----------|
| 1            |         | 24.895   | 123399.375 | 8197191.500  | 49.8212  |
| 2            |         | 51.795   | 60744.172  | 8256040.500  | 50.1788  |
| <b>Total</b> |         |          | 184143.547 | 16453232.000 | 100.0000 |

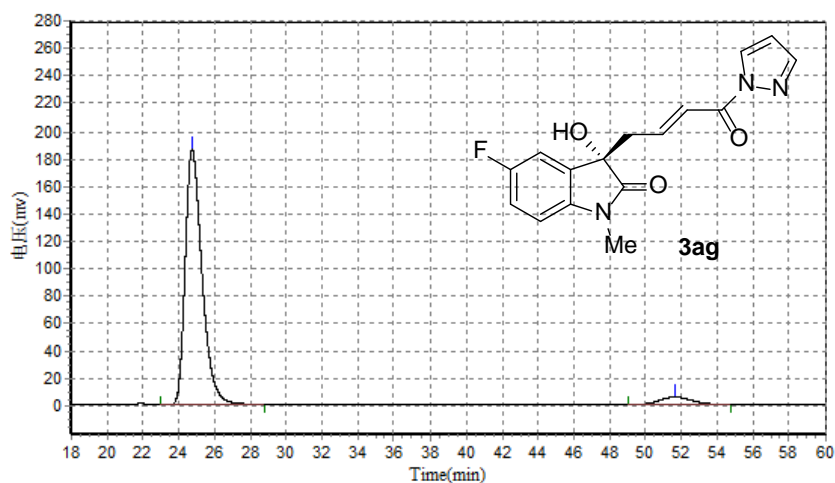

### Results

| Peak No.     | Peak ID | Ret Time | Height     | Area         | Conc.    |
|--------------|---------|----------|------------|--------------|----------|
| 1            |         | 24.745   | 186357.859 | 12167291.000 | 94.1544  |
| 2            |         | 51.622   | 5657.717   | 755402.750   | 5.8456   |
| <b>Total</b> |         |          | 192015.576 | 12922693.750 | 100.0000 |

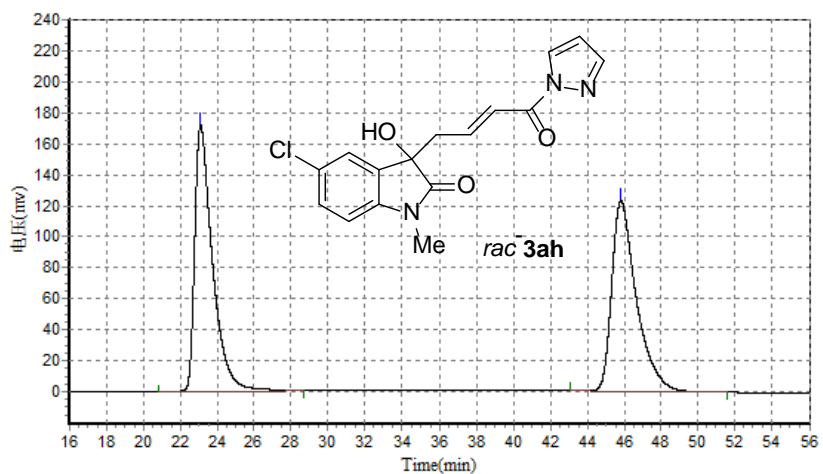

### Results

| Peak No.     | Peak ID | Ret Time | Height     | Area         | Conc.    |
|--------------|---------|----------|------------|--------------|----------|
| 1            |         | 23.098   | 171791.063 | 11433211.000 | 50.1159  |
| 2            |         | 45.820   | 122846.305 | 11380328.000 | 49.8841  |
| <b>Total</b> |         |          | 294637.367 | 22813539.000 | 100.0000 |

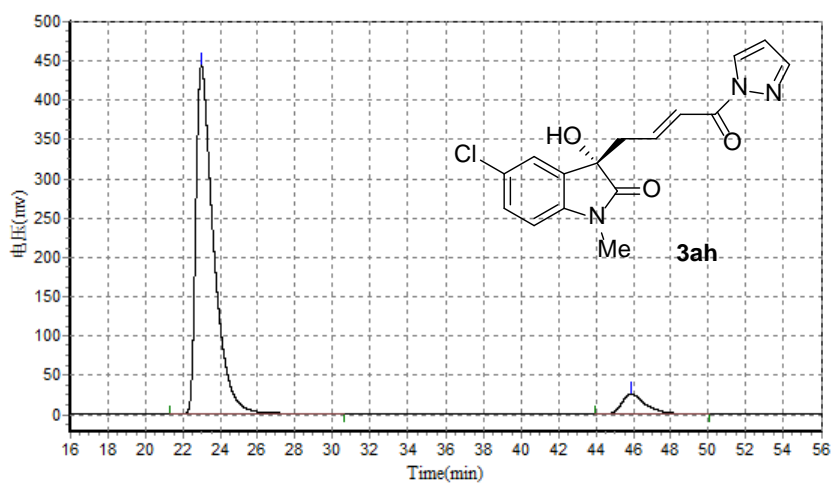

### Results

| Peak No.     | Peak ID | Ret Time | Height     | Area         | Conc.    |
|--------------|---------|----------|------------|--------------|----------|
| 1            |         | 22.990   | 444707.281 | 29205324.000 | 92.6963  |
| 2            |         | 45.883   | 25602.506  | 2301141.250  | 7.3037   |
| <b>Total</b> |         |          | 470309.787 | 31506465.250 | 100.0000 |

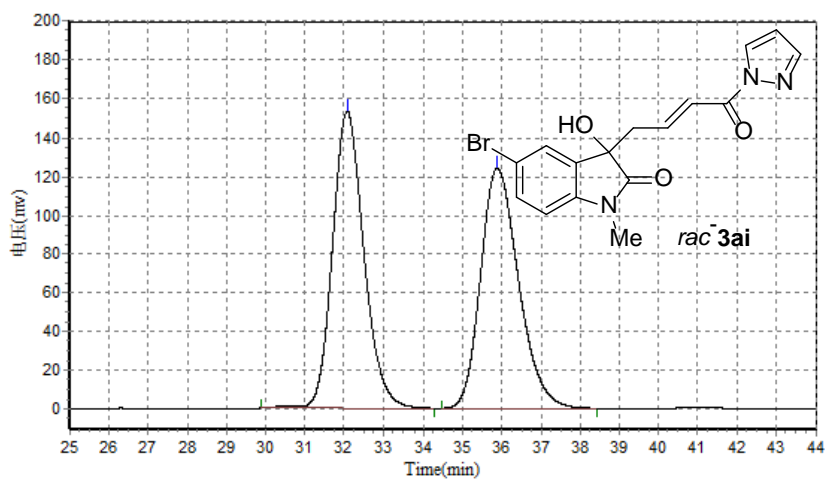

### Results

| Peak No.     | Peak ID | Ret Time | Height     | Area         | Conc.    |
|--------------|---------|----------|------------|--------------|----------|
| 1            |         | 32.080   | 152922.891 | 8510596.000  | 50.4496  |
| 2            |         | 35.882   | 124385.633 | 8358897.000  | 49.5504  |
| <b>Total</b> |         |          | 277308.523 | 16869493.000 | 100.0000 |

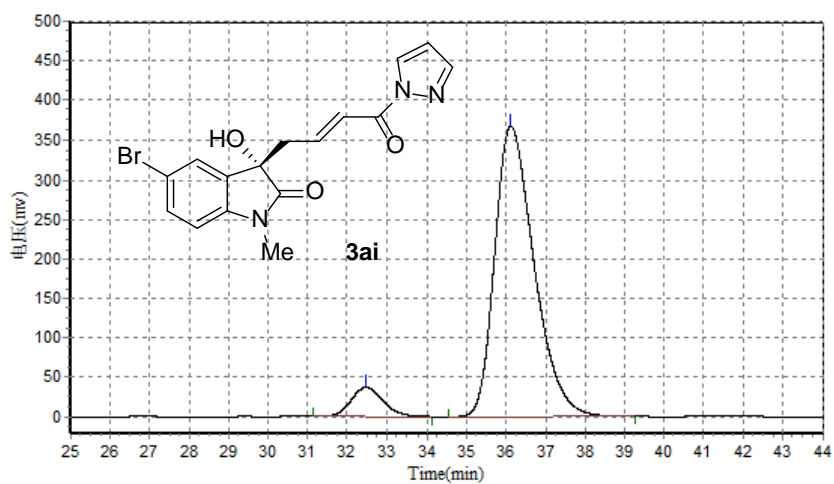

### Results

| Peak No.     | Peak ID | Ret Time | Height     | Area         | Conc.    |
|--------------|---------|----------|------------|--------------|----------|
| 1            |         | 32.480   | 36940.172  | 2058230.750  | 7.4536   |
| 2            |         | 36.118   | 367964.344 | 25555574.000 | 92.5464  |
| <b>Total</b> |         |          | 404904.516 | 27613804.750 | 100.0000 |

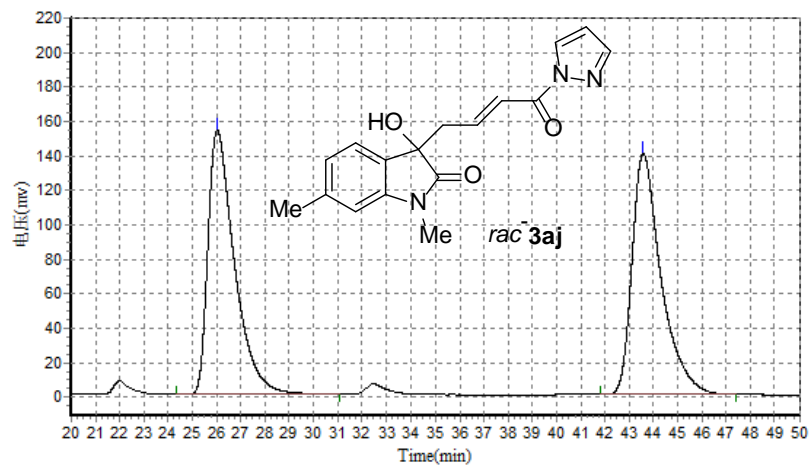

### Results

| Peak No.     | Peak ID | Ret Time | Height     | Area         | Conc.    |
|--------------|---------|----------|------------|--------------|----------|
| 1            |         | 26.027   | 153375.875 | 11662809.000 | 50.0363  |
| 2            |         | 43.580   | 139826.109 | 11645878.000 | 49.9637  |
| <b>Total</b> |         |          | 293201.984 | 23308687.000 | 100.0000 |

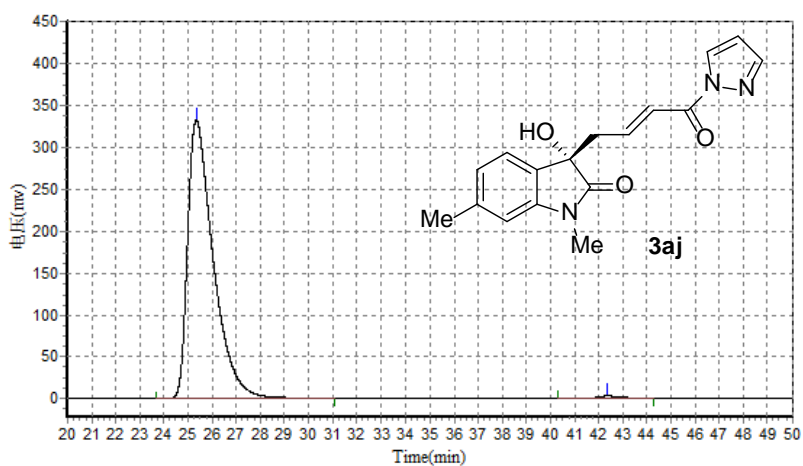

### Results

| Peak No.     | Peak ID | Ret Time | Height     | Area         | Conc.    |
|--------------|---------|----------|------------|--------------|----------|
| 1            |         | 25.348   | 331715.188 | 24457648.000 | 99.1860  |
| 2            |         | 42.355   | 2842.697   | 200726.250   | 0.8140   |
| <b>Total</b> |         |          | 334557.884 | 24658374.250 | 100.0000 |

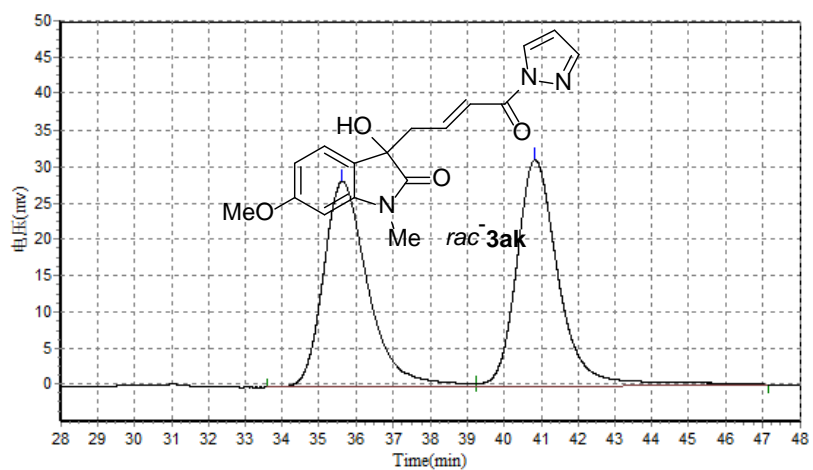

### Results

| Peak No.     | Peak ID | Ret Time | Height    | Area        | Conc.    |
|--------------|---------|----------|-----------|-------------|----------|
| 1            |         | 35.633   | 28340.332 | 2369282.250 | 49.0613  |
| 2            |         | 40.837   | 31219.906 | 2459946.000 | 50.9387  |
| <b>Total</b> |         |          | 59560.238 | 4829228.250 | 100.0000 |

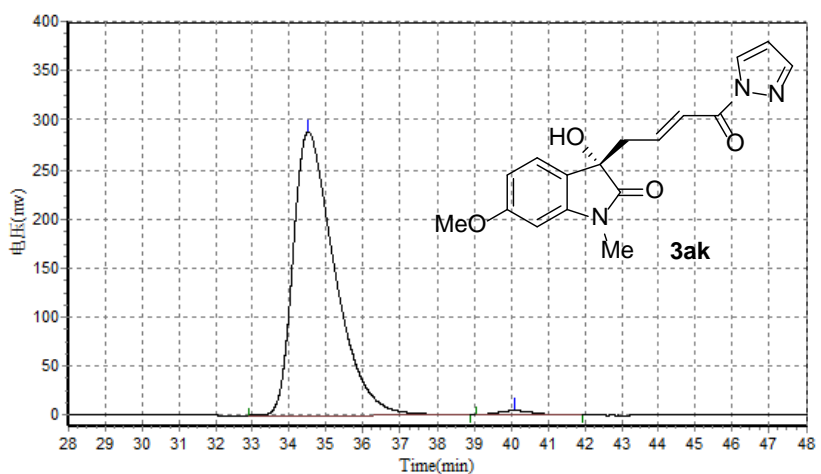

### Results

| Peak No.     | Peak ID | Ret Time | Height     | Area         | Conc.    |
|--------------|---------|----------|------------|--------------|----------|
| 1            |         | 34.513   | 288336.906 | 22622818.000 | 98.7234  |
| 2            |         | 40.093   | 4274.730   | 292539.188   | 1.2766   |
| <b>Total</b> |         |          | 292611.636 | 22915357.188 | 100.0000 |

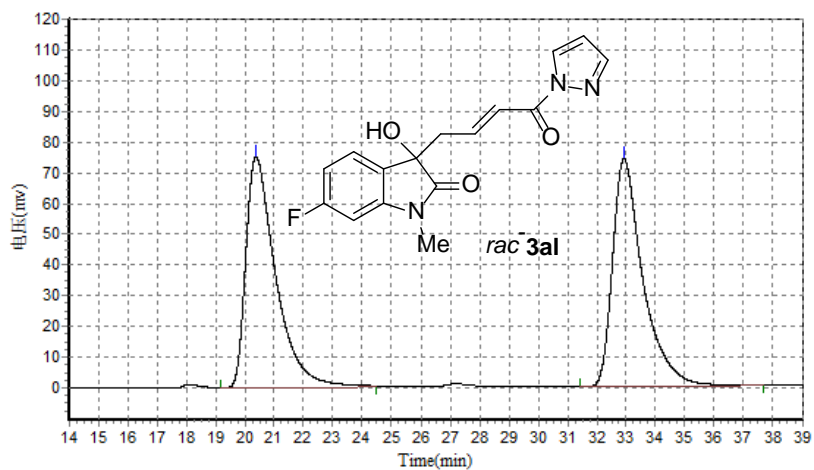

### Results

| Peak No.     | Peak ID | Ret Time | Height     | Area         | Conc.    |
|--------------|---------|----------|------------|--------------|----------|
| 1            |         | 20.382   | 75042.164  | 5299524.000  | 49.7163  |
| 2            |         | 32.925   | 74155.430  | 5360014.000  | 50.2837  |
| <b>Total</b> |         |          | 149197.594 | 10659538.000 | 100.0000 |

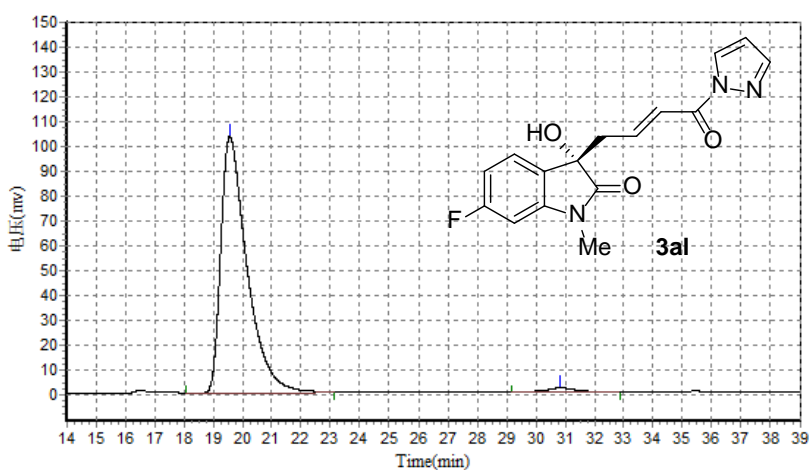

### Results

| Peak No.     | Peak ID | Ret Time | Height     | Area        | Conc.    |
|--------------|---------|----------|------------|-------------|----------|
| 1            |         | 19.568   | 103225.992 | 6396701.500 | 97.9870  |
| 2            |         | 30.820   | 1817.137   | 131408.938  | 2.0130   |
| <b>Total</b> |         |          | 105043.129 | 6528110.438 | 100.0000 |

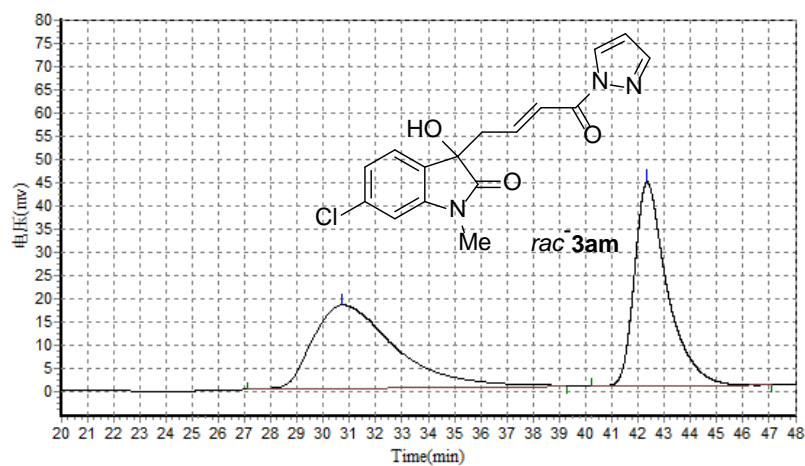

### Results

| Peak No.     | Peak ID | Ret Time | Height    | Area        | Conc.    |
|--------------|---------|----------|-----------|-------------|----------|
| 1            |         | 30.737   | 17927.072 | 3874674.250 | 50.5846  |
| 2            |         | 42.357   | 43802.074 | 3785116.000 | 49.4154  |
| <b>Total</b> |         |          | 61729.146 | 7659790.250 | 100.0000 |

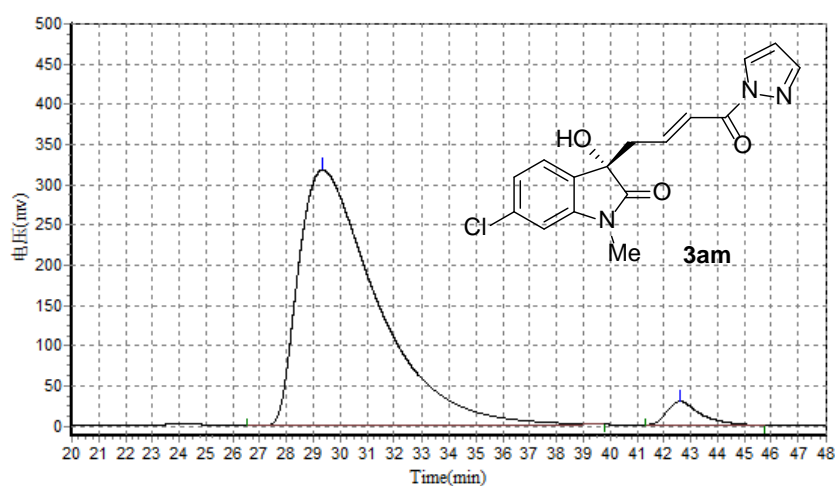

### Results

| Peak No.     | Peak ID | Ret Time | Height     | Area         | Conc.    |
|--------------|---------|----------|------------|--------------|----------|
| 1            |         | 29.343   | 317300.656 | 64548512.000 | 96.2700  |
| 2            |         | 42.575   | 29269.391  | 2500953.000  | 3.7300   |
| <b>Total</b> |         |          | 346570.047 | 67049465.000 | 100.0000 |



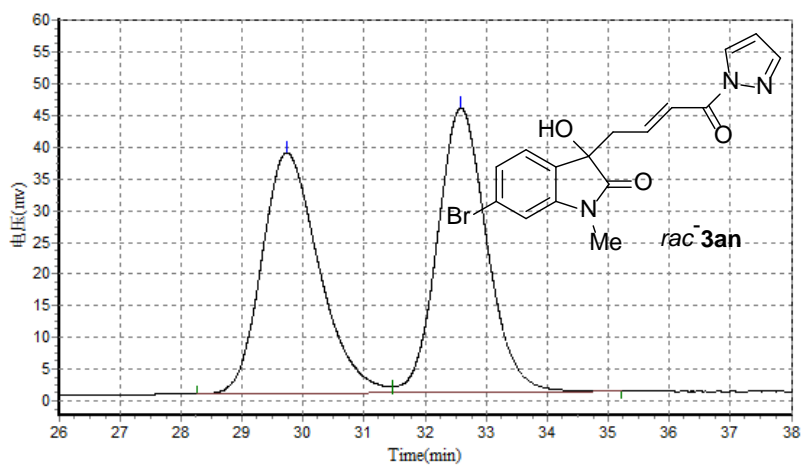

**Results**

| Peak No.     | Peak ID | Ret Time | Height    | Area        | Conc.    |
|--------------|---------|----------|-----------|-------------|----------|
| 1            |         | 29.740   | 37827.883 | 2476533.000 | 49.5508  |
| 2            |         | 32.578   | 44756.848 | 2521437.000 | 50.4492  |
| <b>Total</b> |         |          | 82584.730 | 4997970.000 | 100.0000 |

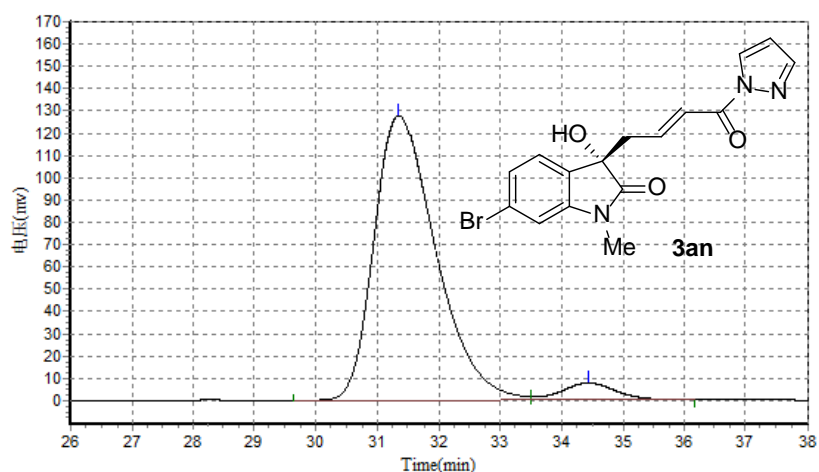

**Results**

| Peak No.     | Peak ID | Ret Time | Height     | Area        | Conc.    |
|--------------|---------|----------|------------|-------------|----------|
| 1            |         | 31.350   | 127582.773 | 8802284.000 | 95.1965  |
| 2            |         | 34.428   | 7431.411   | 444153.000  | 4.8035   |
| <b>Total</b> |         |          | 135014.185 | 9246437.000 | 100.0000 |

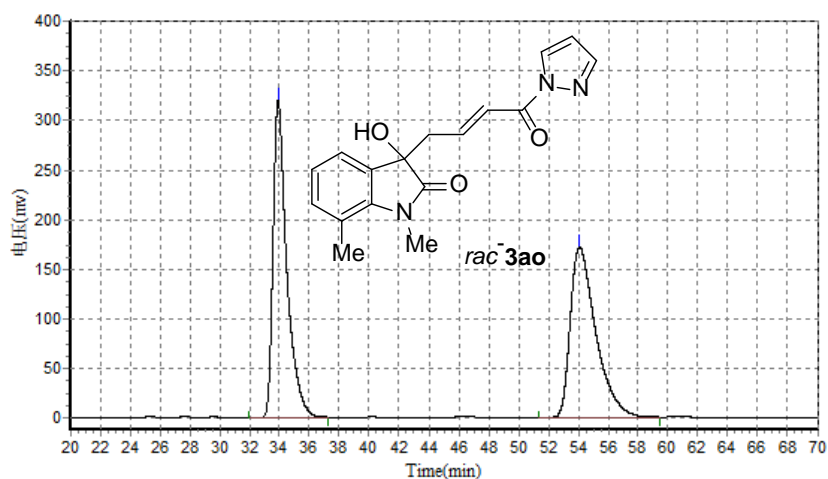

### Results

| Peak No.     | Peak ID | Ret Time | Height     | Area         | Conc.    |
|--------------|---------|----------|------------|--------------|----------|
| 1            |         | 33.922   | 319357.250 | 20328916.000 | 50.0081  |
| 2            |         | 54.068   | 171321.609 | 20322356.000 | 49.9919  |
| <b>Total</b> |         |          | 490678.859 | 40651272.000 | 100.0000 |

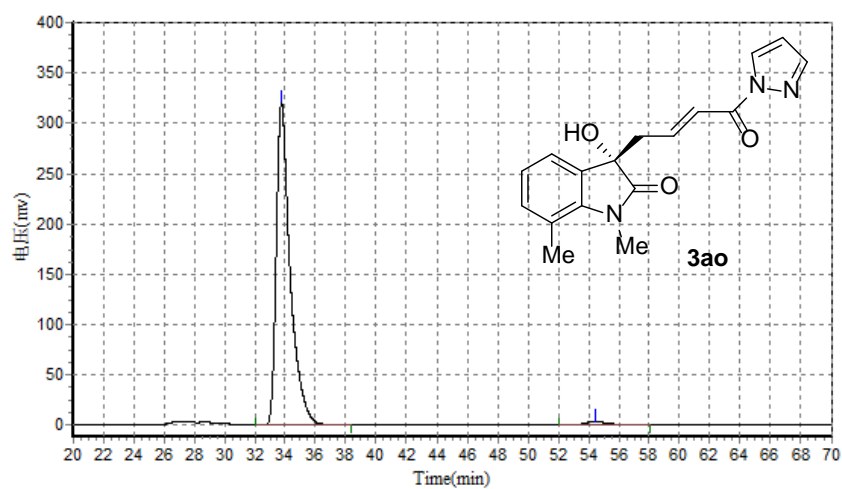

### Results

| Peak No.     | Peak ID | Ret Time | Height     | Area         | Conc.    |
|--------------|---------|----------|------------|--------------|----------|
| 1            |         | 33.763   | 320222.375 | 20345584.000 | 98.0635  |
| 2            |         | 54.400   | 3657.798   | 401769.250   | 1.9365   |
| <b>Total</b> |         |          | 323880.173 | 20747353.250 | 100.0000 |

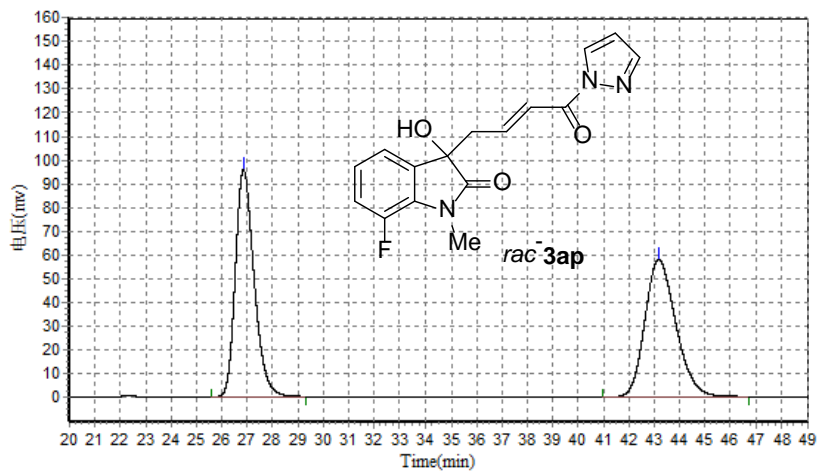

### Results

| Peak No.     | Peak ID | Ret Time | Height     | Area        | Conc.    |
|--------------|---------|----------|------------|-------------|----------|
| 1            |         | 26.855   | 95901.648  | 4908006.500 | 49.9451  |
| 2            |         | 43.168   | 57912.453  | 4918806.000 | 50.0550  |
| <b>Total</b> |         |          | 153814.102 | 9826812.500 | 100.0000 |

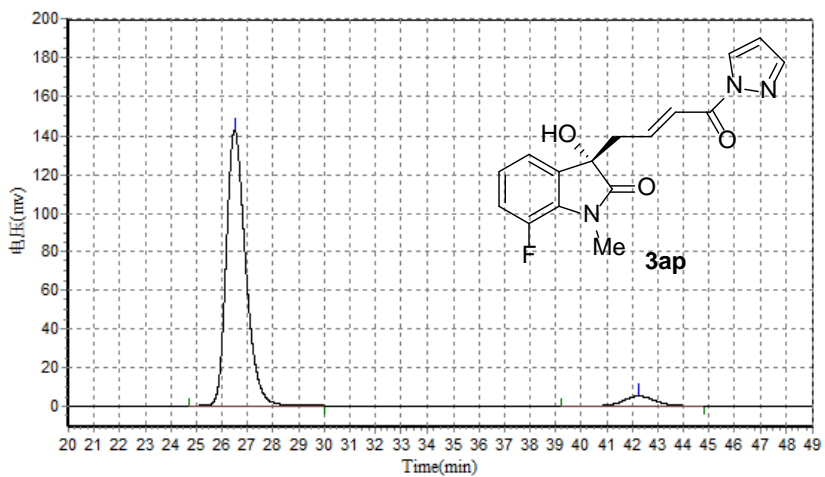

### Results

| Peak No.     | Peak ID | Ret Time | Height     | Area        | Conc.    |
|--------------|---------|----------|------------|-------------|----------|
| 1            |         | 26.495   | 142476.891 | 7456825.000 | 94.4759  |
| 2            |         | 42.245   | 5119.101   | 436008.781  | 5.5241   |
| <b>Total</b> |         |          | 147595.991 | 7892833.781 | 100.0000 |

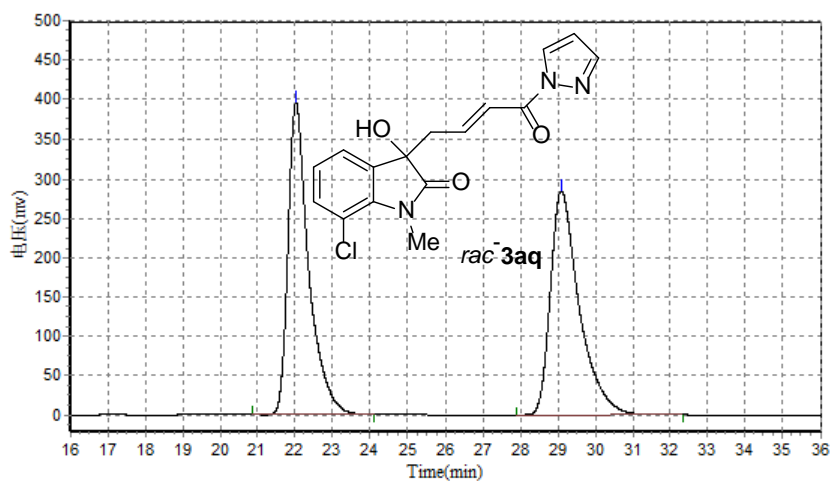

### Results

| Peak No.     | Peak ID | Ret Time | Height     | Area         | Conc.    |
|--------------|---------|----------|------------|--------------|----------|
| 1            |         | 22.025   | 395740.281 | 15221214.000 | 49.9588  |
| 2            |         | 29.090   | 284586.219 | 15246341.000 | 50.0412  |
| <b>Total</b> |         |          | 680326.500 | 30467555.000 | 100.0000 |

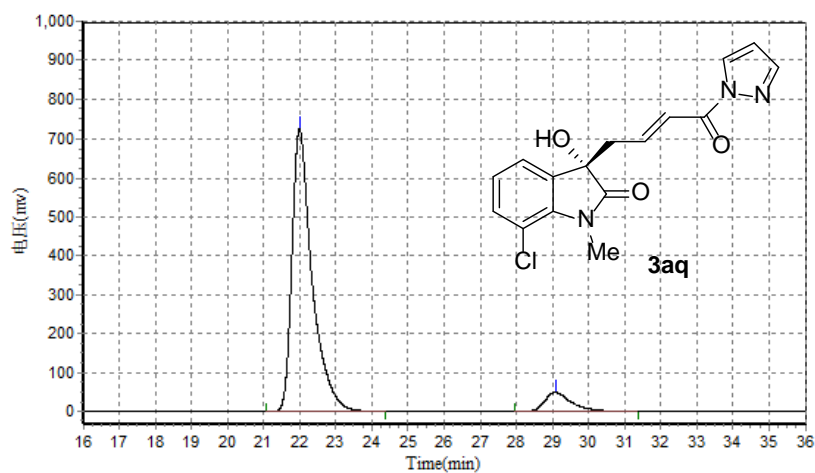

### Results

| Peak No.     | Peak ID | Ret Time | Height     | Area         | Conc.    |
|--------------|---------|----------|------------|--------------|----------|
| 1            |         | 21.997   | 726918.625 | 28045564.000 | 91.8116  |
| 2            |         | 29.075   | 48851.684  | 2501313.750  | 8.1884   |
| <b>Total</b> |         |          | 775770.309 | 30546877.750 | 100.0000 |

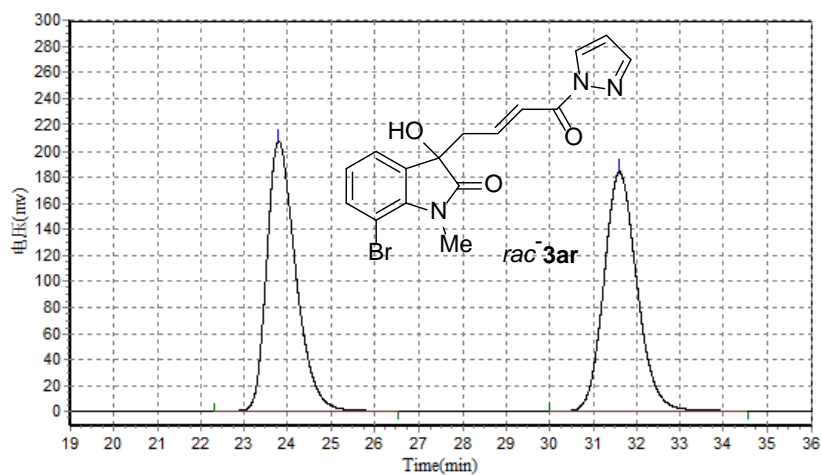

### Results

| Peak No.     | Peak ID | Ret Time | Height     | Area         | Conc.    |
|--------------|---------|----------|------------|--------------|----------|
| 1            |         | 23.795   | 207517.469 | 9599314.000  | 49.4542  |
| 2            |         | 31.602   | 184482.516 | 9811212.000  | 50.5458  |
| <b>Total</b> |         |          | 391999.984 | 19410526.000 | 100.0000 |

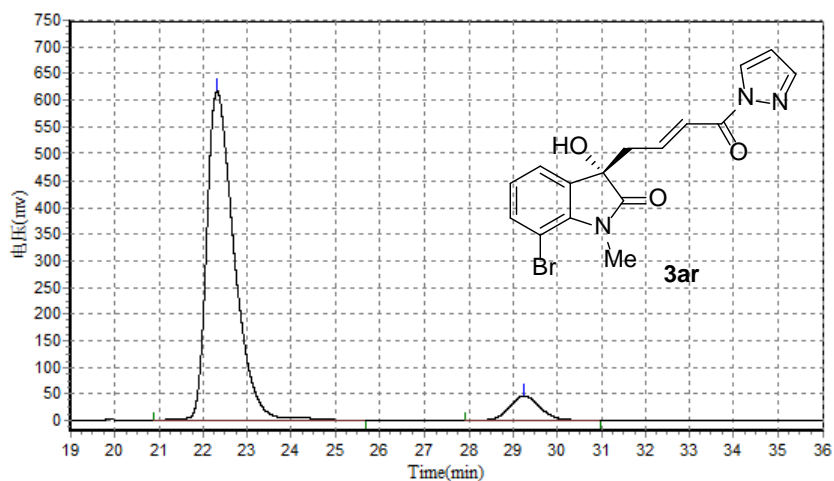

### Results

| Peak No.     | Peak ID | Ret Time | Height     | Area         | Conc.    |
|--------------|---------|----------|------------|--------------|----------|
| 1            |         | 22.318   | 617302.313 | 26633330.000 | 92.5593  |
| 2            |         | 29.243   | 45390.262  | 2141003.000  | 7.4407   |
| <b>Total</b> |         |          | 662692.574 | 28774333.000 | 100.0000 |

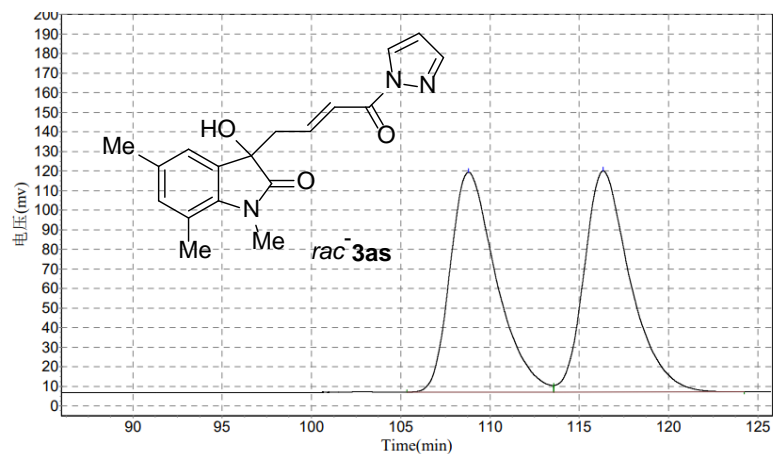

### Results

| Peak No.     | Peak ID | Ret Time | Height     | Area         | Conc.    |
|--------------|---------|----------|------------|--------------|----------|
| 1            |         | 108.805  | 112287.422 | 20080312.000 | 49.8481  |
| 2            |         | 116.330  | 112895.422 | 20202694.000 | 50.1519  |
| <b>Total</b> |         |          | 225182.844 | 40283006.000 | 100.0000 |

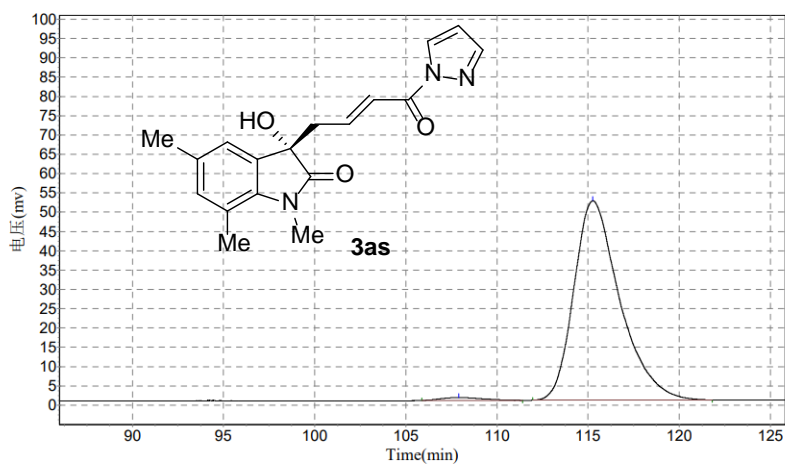

### Results

| Peak No.     | Peak ID | Ret Time | Height    | Area        | Conc.    |
|--------------|---------|----------|-----------|-------------|----------|
| 1            |         | 107.908  | 765.990   | 119499.414  | 1.3048   |
| 2            |         | 115.268  | 51679.797 | 9038896.000 | 98.6952  |
| <b>Total</b> |         |          | 52445.787 | 9158395.414 | 100.0000 |

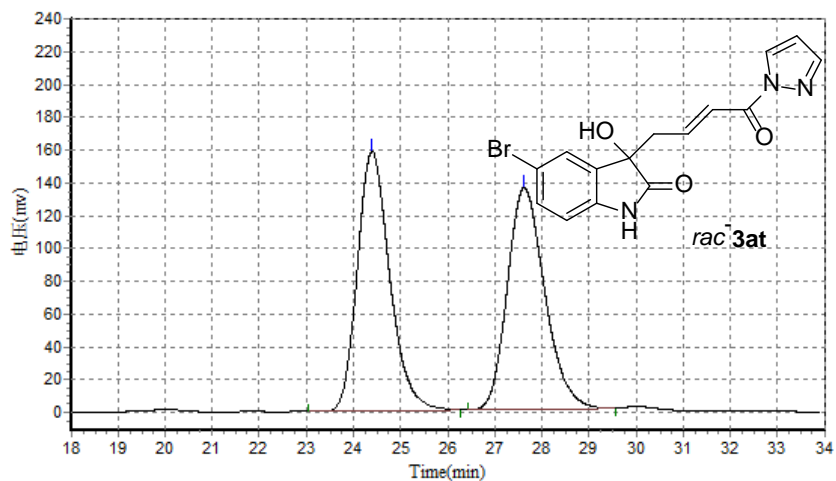

### Results

| Peak No.     | Peak ID | Ret Time | Height     | Area         | Conc.    |
|--------------|---------|----------|------------|--------------|----------|
| 1            |         | 24.403   | 157949.547 | 7565719.500  | 50.2898  |
| 2            |         | 27.612   | 135302.938 | 7478522.000  | 49.7102  |
| <b>Total</b> |         |          | 293252.484 | 15044241.500 | 100.0000 |

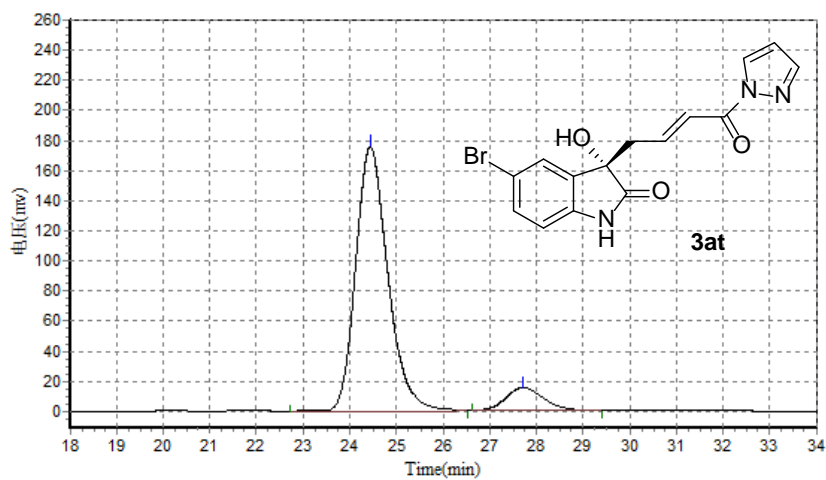

### Results

| Peak No.     | Peak ID | Ret Time | Height     | Area        | Conc.    |
|--------------|---------|----------|------------|-------------|----------|
| 1            |         | 24.443   | 174744.375 | 8380856.500 | 90.8035  |
| 2            |         | 27.718   | 15223.012  | 848810.125  | 9.1965   |
| <b>Total</b> |         |          | 189967.387 | 9229666.625 | 100.0000 |

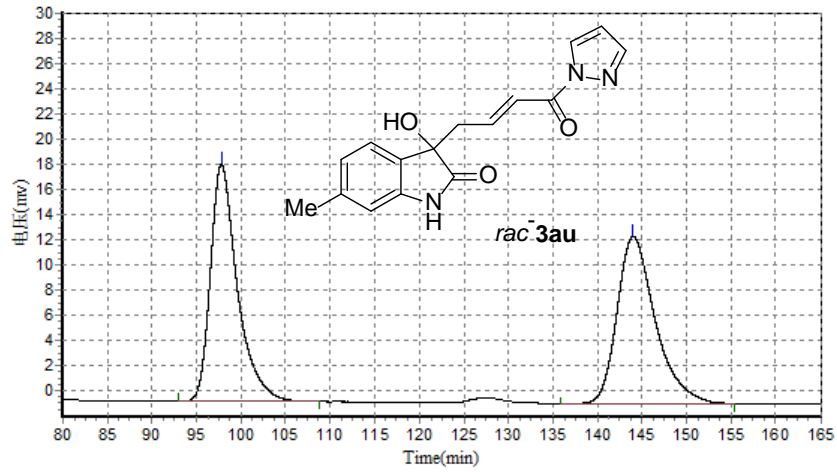

### Results

| Peak No.     | Peak ID | Ret Time | Height    | Area        | Conc.    |
|--------------|---------|----------|-----------|-------------|----------|
| 1            |         | 97.815   | 18884.381 | 3961220.000 | 49.9608  |
| 2            |         | 143.977  | 13291.020 | 3967428.250 | 50.0392  |
| <b>Total</b> |         |          | 32175.400 | 7928648.250 | 100.0000 |

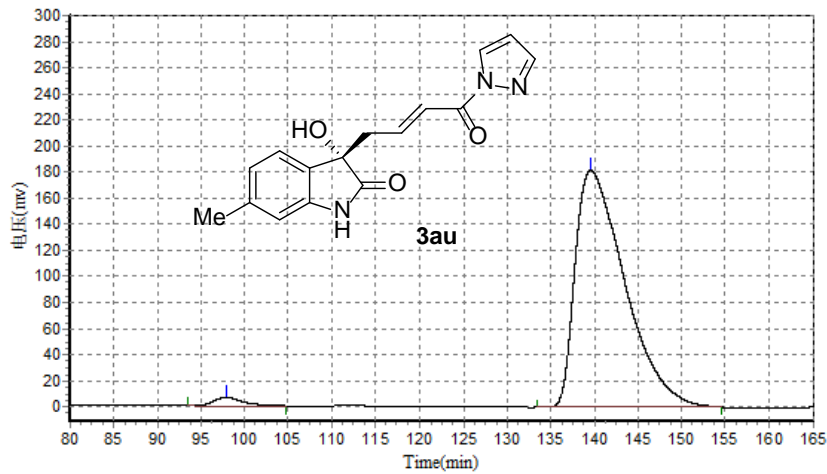

### Results

| Peak No.     | Peak ID | Ret Time | Height     | Area         | Conc.    |
|--------------|---------|----------|------------|--------------|----------|
| 1            |         | 97.872   | 6205.766   | 1399736.750  | 1.9100   |
| 2            |         | 139.610  | 181452.672 | 71884424.000 | 98.0900  |
| <b>Total</b> |         |          | 187658.438 | 73284160.750 | 100.0000 |



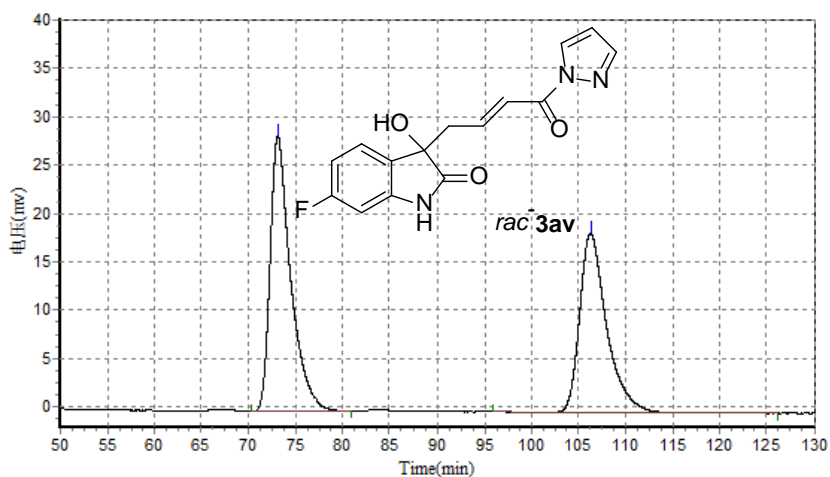

### Results

| Peak No.     | Peak ID | Ret Time | Height    | Area        | Conc.    |
|--------------|---------|----------|-----------|-------------|----------|
| 1            |         | 73.130   | 27207.719 | 3800213.750 | 51.1185  |
| 2            |         | 106.270  | 18512.527 | 3633907.250 | 48.8815  |
| <b>Total</b> |         |          | 45720.246 | 7434121.000 | 100.0000 |

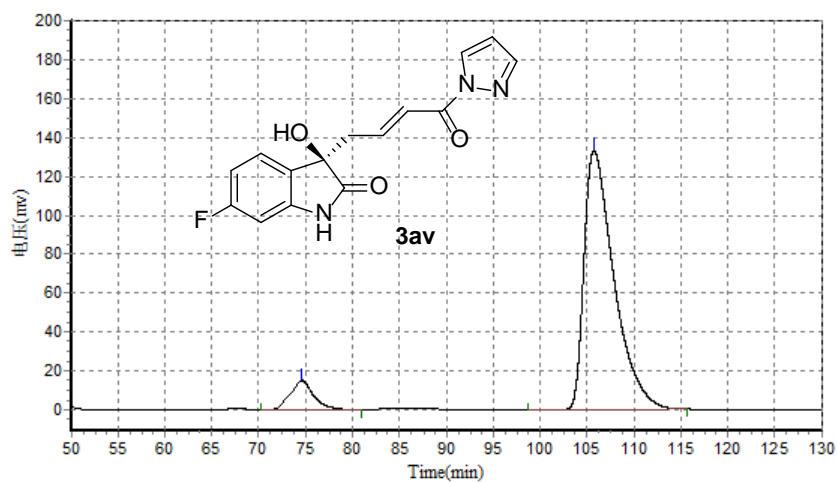

### Results

| Peak No.     | Peak ID | Ret Time | Height     | Area         | Conc.    |
|--------------|---------|----------|------------|--------------|----------|
| 1            |         | 74.608   | 15033.543  | 2634599.750  | 8.1868   |
| 2            |         | 105.750  | 133015.594 | 29546406.000 | 91.8132  |
| <b>Total</b> |         |          | 148049.137 | 32181005.750 | 100.0000 |

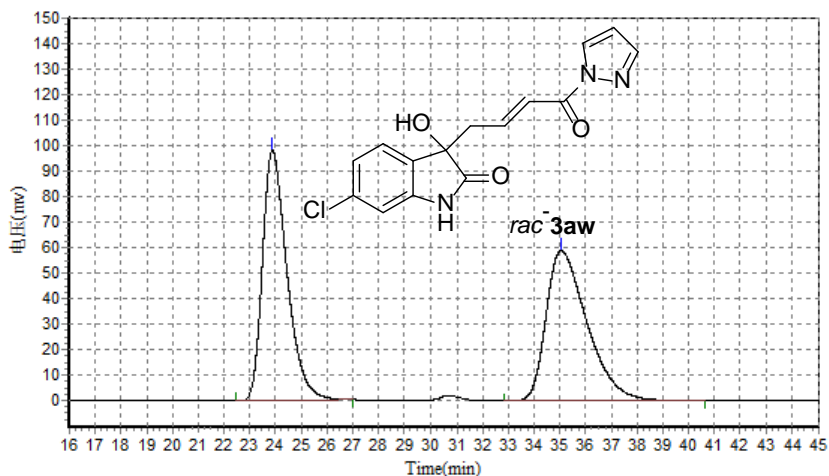

### Results

| Peak No.     | Peak ID | Ret Time | Height     | Area         | Conc.    |
|--------------|---------|----------|------------|--------------|----------|
| 1            |         | 23.880   | 97982.836  | 6481269.000  | 49.8976  |
| 2            |         | 35.050   | 58980.871  | 6507872.500  | 50.1024  |
| <b>Total</b> |         |          | 156963.707 | 12989141.500 | 100.0000 |

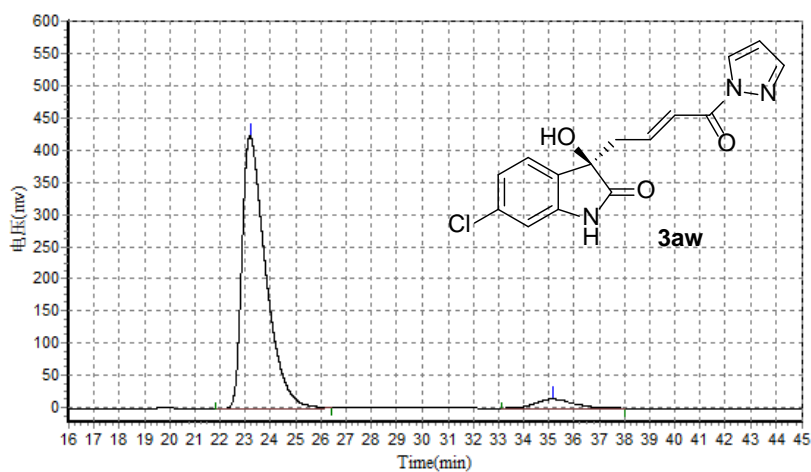

### Results

| Peak No.     | Peak ID | Ret Time | Height     | Area         | Conc.    |
|--------------|---------|----------|------------|--------------|----------|
| 1            |         | 23.193   | 423811.531 | 27456784.000 | 94.8116  |
| 2            |         | 35.135   | 14117.263  | 1502518.500  | 5.1884   |
| <b>Total</b> |         |          | 437928.794 | 28959302.500 | 100.0000 |

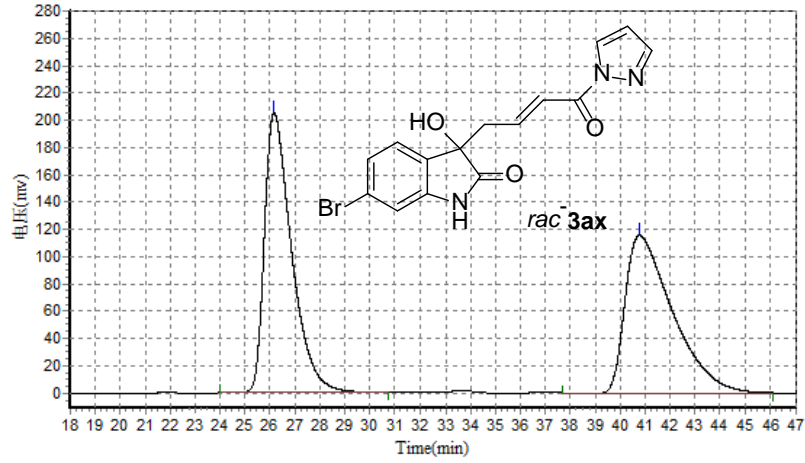

### Results

| Peak No.     | Peak ID | Ret Time | Height     | Area         | Conc.    |
|--------------|---------|----------|------------|--------------|----------|
| 1            |         | 26.172   | 205068.422 | 15544643.000 | 50.5325  |
| 2            |         | 40.782   | 115476.211 | 15217005.000 | 49.4675  |
| <b>Total</b> |         |          | 320544.633 | 30761648.000 | 100.0000 |

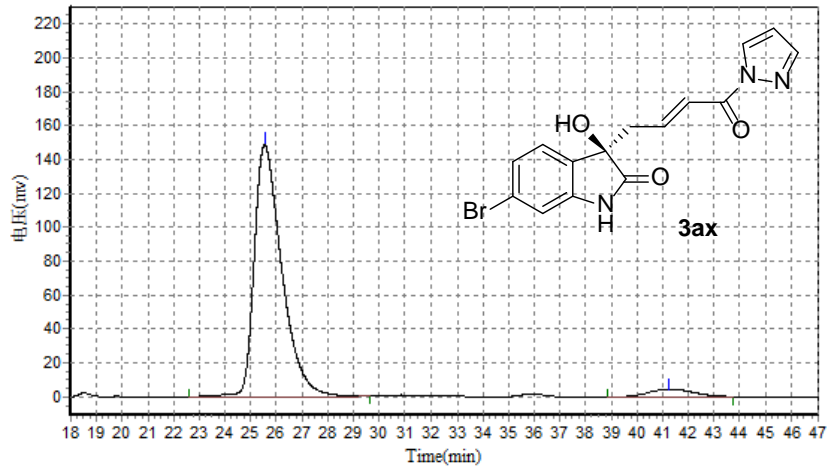

### Results

| Peak No.     | Peak ID | Ret Time | Height     | Area         | Conc.    |
|--------------|---------|----------|------------|--------------|----------|
| 1            |         | 25.547   | 148882.094 | 11098267.000 | 95.1919  |
| 2            |         | 41.263   | 4630.260   | 560568.000   | 4.8081   |
| <b>Total</b> |         |          | 153512.354 | 11658835.000 | 100.0000 |

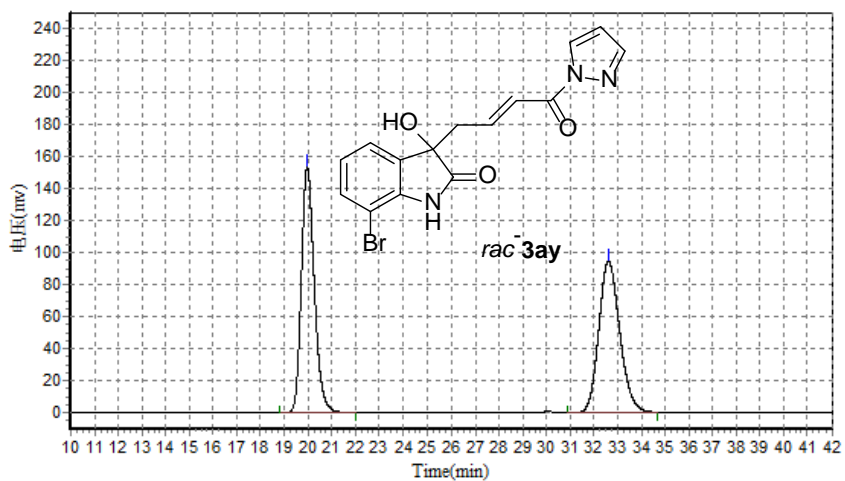

### Results

| Peak No.     | Peak ID | Ret Time | Height     | Area         | Conc.    |
|--------------|---------|----------|------------|--------------|----------|
| 1            |         | 19.968   | 154140.469 | 5844029.000  | 50.1287  |
| 2            |         | 32.613   | 95035.633  | 5814020.000  | 49.8713  |
| <b>Total</b> |         |          | 249176.102 | 11658049.000 | 100.0000 |

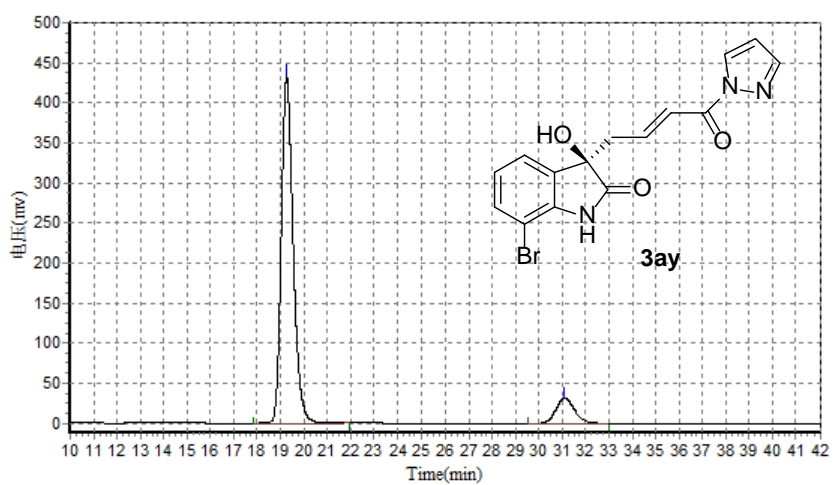

### Results

| Peak No.     | Peak ID | Ret Time | Height     | Area         | Conc.    |
|--------------|---------|----------|------------|--------------|----------|
| 1            |         | 19.260   | 432633.563 | 15244854.000 | 89.5299  |
| 2            |         | 31.108   | 31100.912  | 1782819.500  | 10.4701  |
| <b>Total</b> |         |          | 463734.475 | 17027673.500 | 100.0000 |

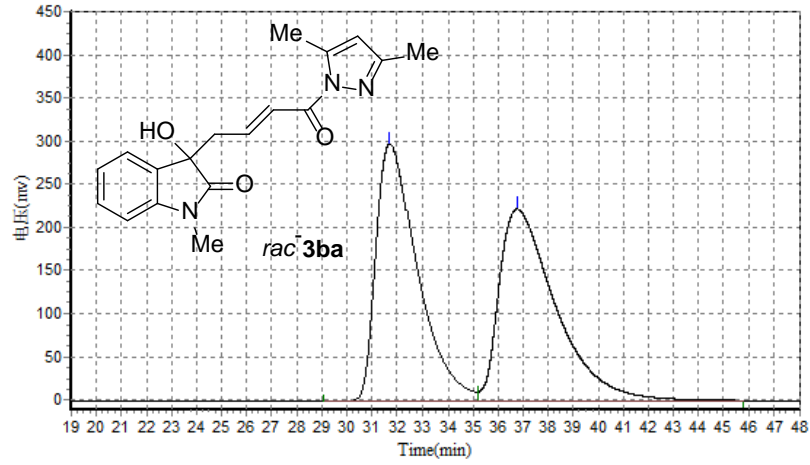

### Results

| Peak No.     | Peak ID | Ret Time | Height     | Area         | Conc.    |
|--------------|---------|----------|------------|--------------|----------|
| 1            |         | 31.718   | 297595.594 | 33807084.000 | 49.2333  |
| 2            |         | 36.745   | 222260.000 | 34860028.000 | 50.7667  |
| <b>Total</b> |         |          | 519855.594 | 68667112.000 | 100.0000 |

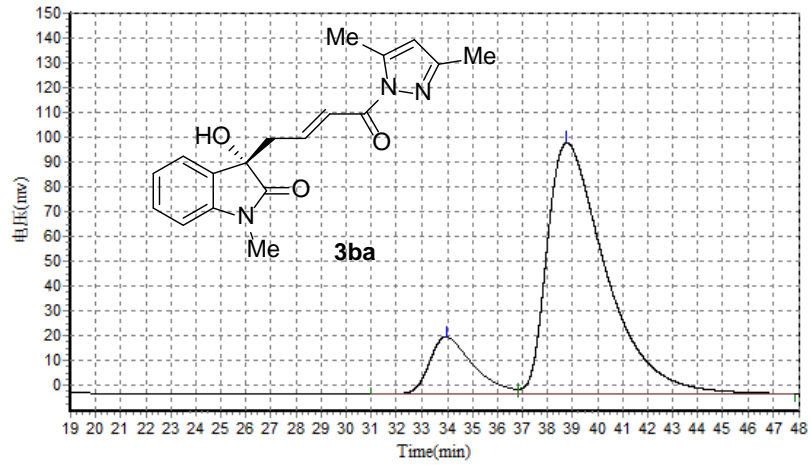

### Results

| Peak No.     | Peak ID | Ret Time | Height     | Area         | Conc.    |
|--------------|---------|----------|------------|--------------|----------|
| 1            |         | 33.950   | 23077.168  | 2805245.500  | 14.5334  |
| 2            |         | 38.765   | 101191.859 | 16496749.000 | 85.4666  |
| <b>Total</b> |         |          | 124269.027 | 19301994.500 | 100.0000 |

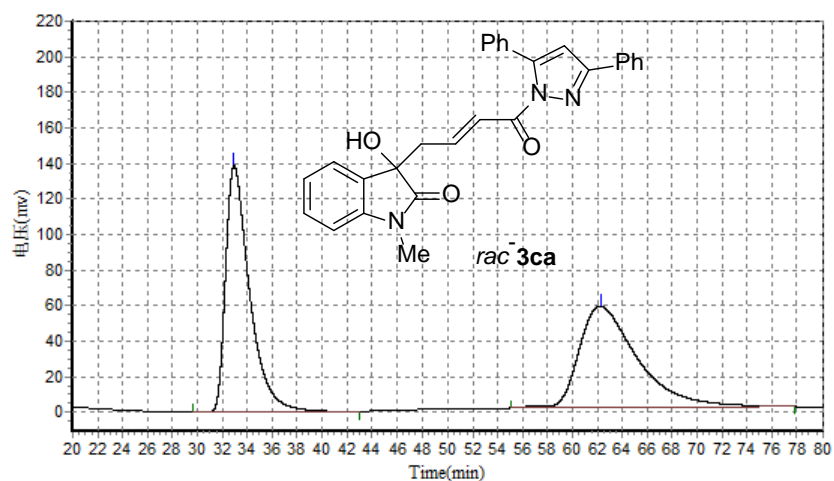

### Results

| Peak No.     | Peak ID | Ret Time | Height     | Area         | Conc.    |
|--------------|---------|----------|------------|--------------|----------|
| 1            |         | 32.948   | 138522.719 | 18543710.000 | 49.9717  |
| 2            |         | 62.232   | 56875.668  | 18564728.000 | 50.0283  |
| <b>Total</b> |         |          | 195398.387 | 37108438.000 | 100.0000 |

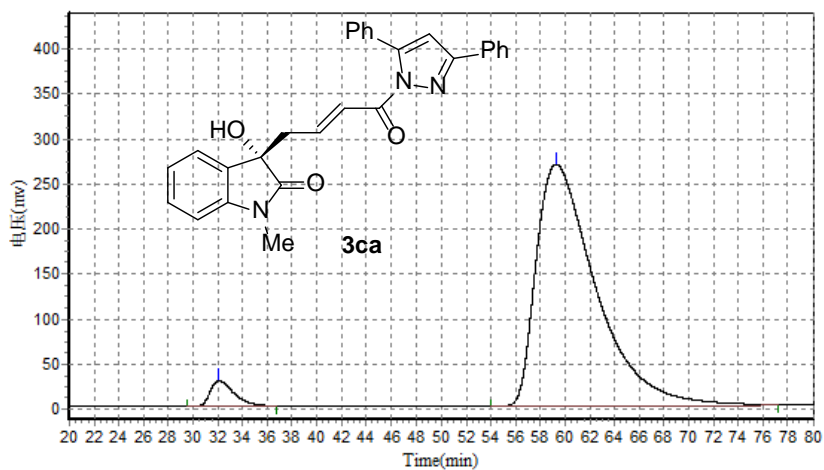

### Results

| Peak No.     | Peak ID | Ret Time | Height     | Area         | Conc.    |
|--------------|---------|----------|------------|--------------|----------|
| 1            |         | 32.108   | 28671.020  | 3810326.000  | 4.0641   |
| 2            |         | 59.245   | 268471.469 | 89945096.000 | 95.9359  |
| <b>Total</b> |         |          | 297142.488 | 93755422.000 | 100.0000 |

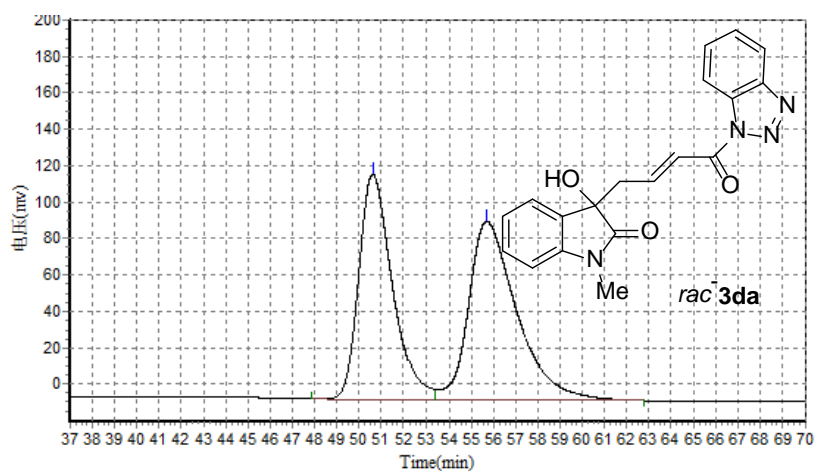

### Results

| Peak No.     | Peak ID | Ret Time | Height     | Area         | Conc.    |
|--------------|---------|----------|------------|--------------|----------|
| 1            |         | 50.625   | 123437.539 | 12872888.000 | 50.3314  |
| 2            |         | 55.695   | 92669.094  | 12703346.000 | 49.6686  |
| <b>Total</b> |         |          | 216106.633 | 25576234.000 | 100.0000 |

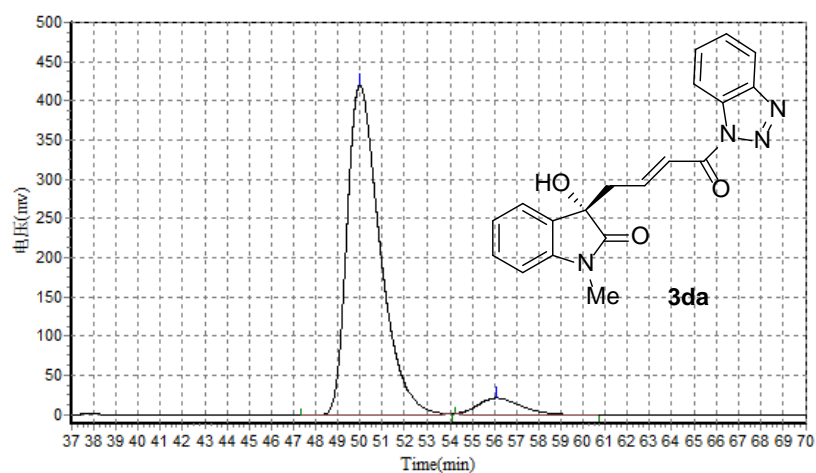

### Results

| Peak No.     | Peak ID | Ret Time | Height     | Area         | Conc.    |
|--------------|---------|----------|------------|--------------|----------|
| 1            |         | 49.992   | 420281.625 | 43163548.000 | 94.1428  |
| 2            |         | 56.110   | 20238.941  | 2685493.250  | 5.8573   |
| <b>Total</b> |         |          | 440520.566 | 45849041.250 | 100.0000 |

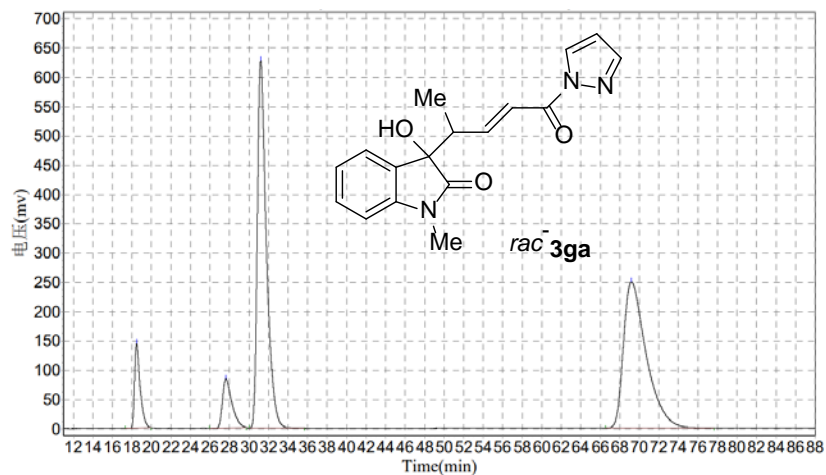

### Results

| Peak No.     | Peak ID | Ret Time | Height      | Area         | Conc.    |
|--------------|---------|----------|-------------|--------------|----------|
| 1            |         | 18.478   | 144970.797  | 5701830.000  | 6.1945   |
| 2            |         | 27.625   | 84008.375   | 5568705.500  | 6.0499   |
| 3            |         | 31.203   | 627064.063  | 40371924.000 | 43.8606  |
| 4            |         | 69.202   | 249688.828  | 40403524.000 | 43.8949  |
| <b>Total</b> |         |          | 1105732.063 | 92045983.500 | 100.0000 |

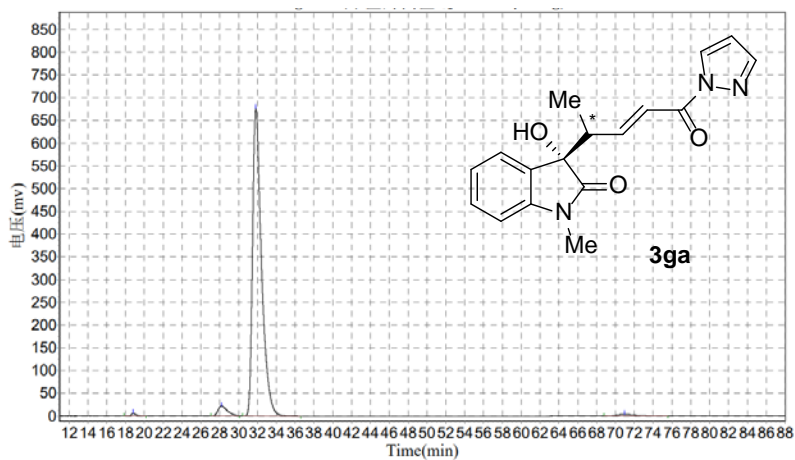

### Results

| Peak No.     | Peak ID | Ret Time | Height     | Area         | Conc.    |
|--------------|---------|----------|------------|--------------|----------|
| 1            |         | 18.797   | 5641.336   | 221189.594   | 0.4736   |
| 2            |         | 28.182   | 21584.182  | 1482099.125  | 3.1732   |
| 3            |         | 31.828   | 676421.250 | 44499072.000 | 95.2724  |
| 4            |         | 70.960   | 3456.905   | 504849.938   | 1.0809   |
| <b>Total</b> |         |          | 707103.673 | 46707210.656 | 100.0000 |



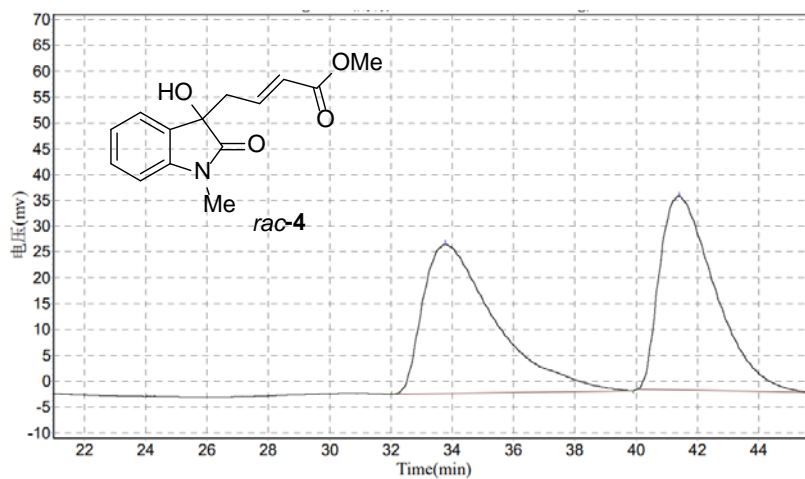

### Results

| Peak No. | Peak ID | Ret Time | Height    | Area        | Conc.    |
|----------|---------|----------|-----------|-------------|----------|
| 1        |         | 33.778   | 28828.404 | 4704108.500 | 50.0089  |
| 2        |         | 41.408   | 37585.512 | 4702439.500 | 49.9911  |
| Total    |         |          | 66413.916 | 9406548.000 | 100.0000 |

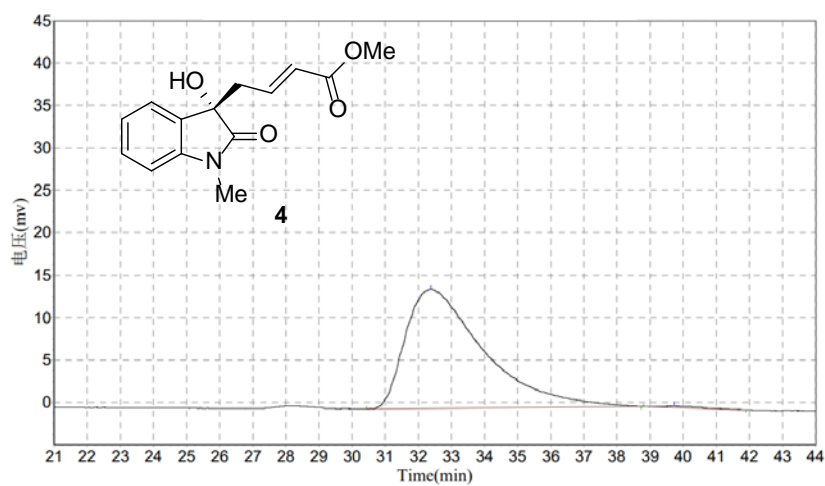

### Results

| Peak No. | Peak ID | Ret Time | Height    | Area        | Conc.    |
|----------|---------|----------|-----------|-------------|----------|
| 1        |         | 32.382   | 14001.913 | 2285290.500 | 99.3399  |
| 2        |         | 39.732   | 168.444   | 15186.409   | 0.6601   |
| Total    |         |          | 14170.358 | 2300476.909 | 100.0000 |

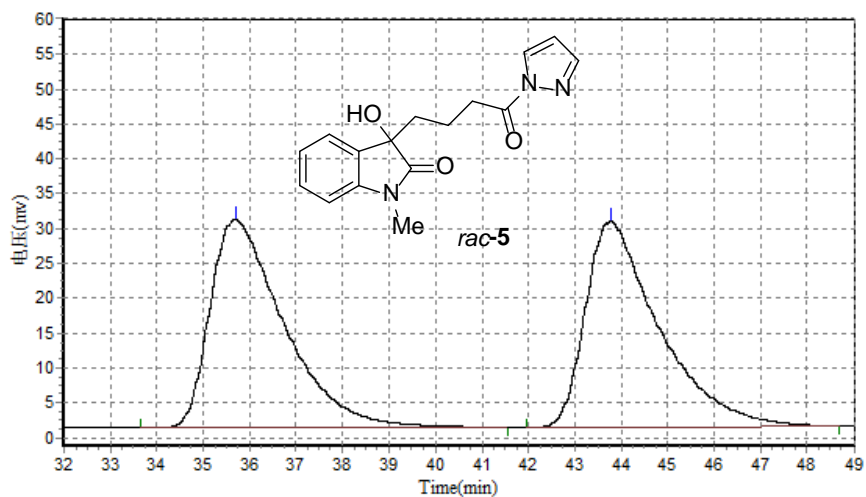

### Results

| Peak No.     | Peak ID | Ret Time | Height    | Area        | Conc.    |
|--------------|---------|----------|-----------|-------------|----------|
| 1            |         | 35.697   | 29914.379 | 3302776.500 | 50.3930  |
| 2            |         | 43.763   | 29551.355 | 3251256.000 | 49.6070  |
| <b>Total</b> |         |          | 59465.734 | 6554032.500 | 100.0000 |

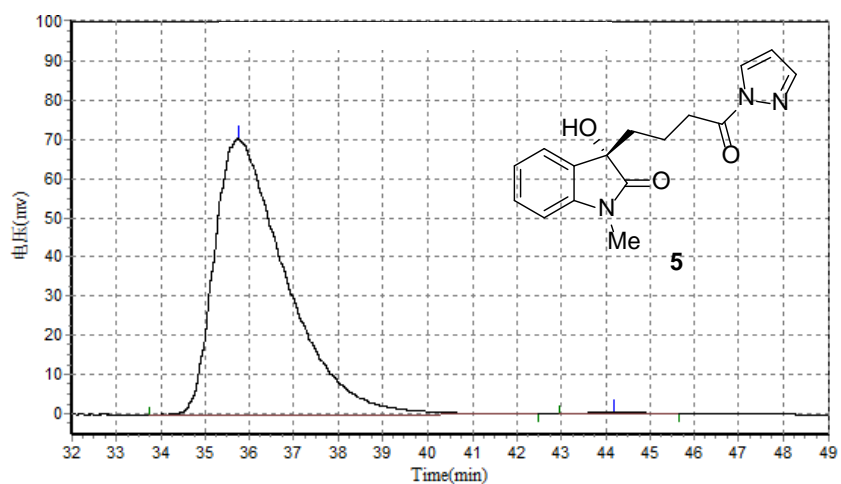

### Results

| Peak No.     | Peak ID | Ret Time | Height    | Area        | Conc.    |
|--------------|---------|----------|-----------|-------------|----------|
| 1            |         | 35.748   | 70351.078 | 7852268.500 | 99.3968  |
| 2            |         | 44.185   | 588.865   | 47650.699   | 0.6032   |
| <b>Total</b> |         |          | 70939.943 | 7899919.199 | 100.0000 |

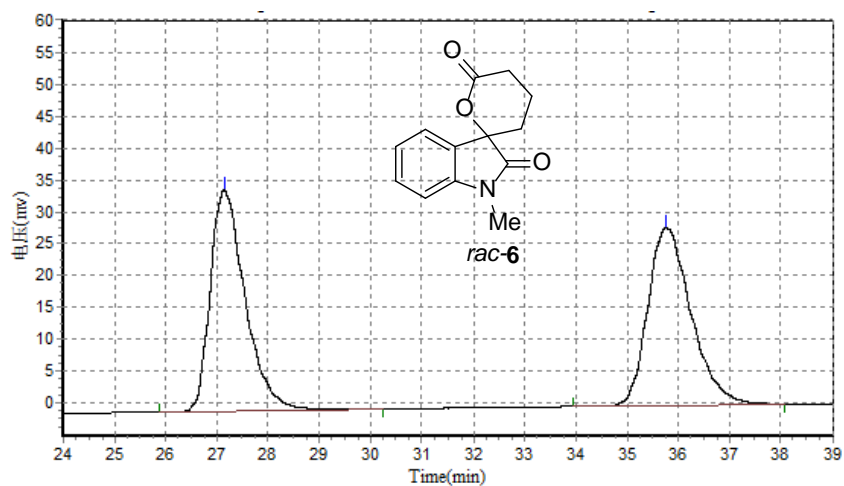

### Results

| Peak No.     | Peak ID | Ret Time | Height    | Area        | Conc.    |
|--------------|---------|----------|-----------|-------------|----------|
| 1            |         | 27.140   | 34734.004 | 1641941.000 | 50.0938  |
| 2            |         | 35.750   | 27950.576 | 1635794.500 | 49.9062  |
| <b>Total</b> |         |          | 62684.580 | 3277735.500 | 100.0000 |

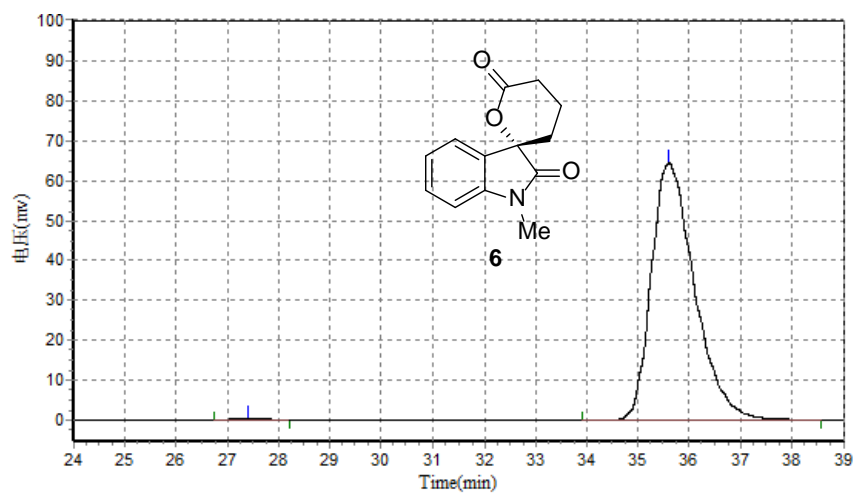

### Results

| Peak No.     | Peak ID | Ret Time | Height    | Area        | Conc.    |
|--------------|---------|----------|-----------|-------------|----------|
| 1            |         | 27.405   | 511.303   | 21577.701   | 0.5697   |
| 2            |         | 35.608   | 64346.277 | 3766186.250 | 99.4303  |
| <b>Total</b> |         |          | 64857.580 | 3787763.951 | 100.0000 |

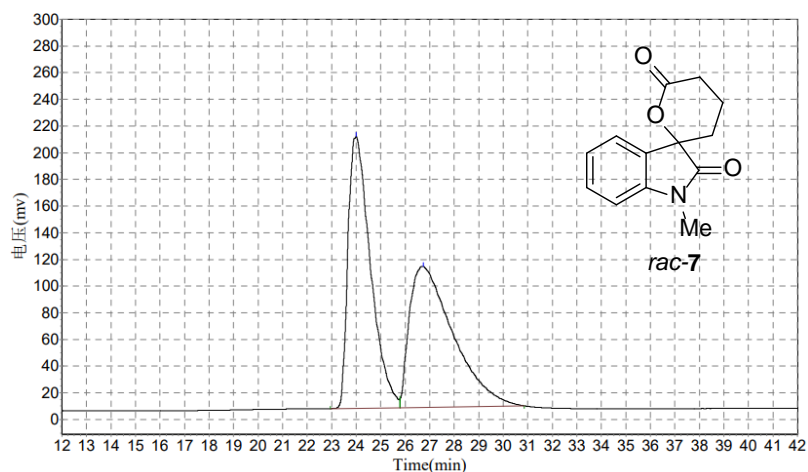

**Results**

| Peak No.     | Peak ID | Ret Time | Height     | Area         | Conc.    |
|--------------|---------|----------|------------|--------------|----------|
| 1            |         | 24.008   | 203687.719 | 12942083.000 | 49.8135  |
| 2            |         | 26.733   | 105729.633 | 13039004.000 | 50.1865  |
| <b>Total</b> |         |          | 309417.352 | 25981087.000 | 100.0000 |

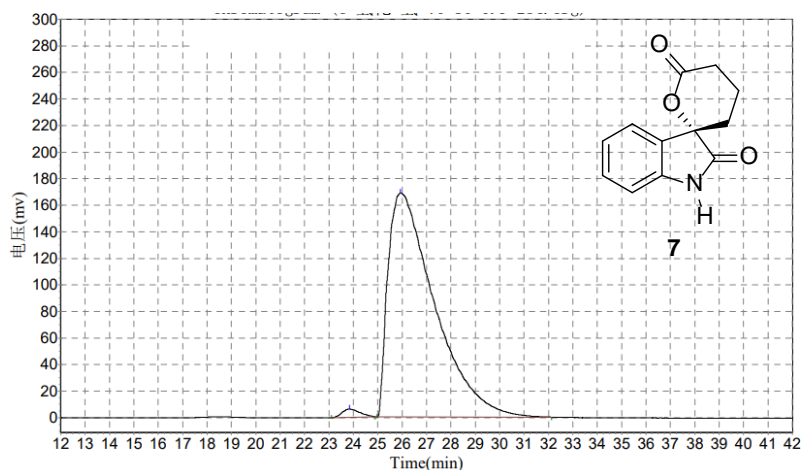

**Results**

| Peak No.     | Peak ID | Ret Time | Height     | Area         | Conc.    |
|--------------|---------|----------|------------|--------------|----------|
| 1            |         | 23.845   | 6205.409   | 315397.563   | 1.3959   |
| 2            |         | 25.918   | 168402.453 | 22279704.000 | 98.6041  |
| <b>Total</b> |         |          | 174607.862 | 22595101.563 | 100.0000 |
